# Supplementary material for: A theoretical kinetic model of the temperature and pH dependent dimerization of orthosilicic acid in aqueous solution
Source: Royal Society of Chemistry journal article supplement (doi:10.1039/c1cp22273b), 2011-11-28
Supplement: c1cp22273b.pdf [file c1cp22273b.pdf]

## Supplementary Info – Contents

|                                                                                                                                                                                                                                                                                                                                  |   |
|----------------------------------------------------------------------------------------------------------------------------------------------------------------------------------------------------------------------------------------------------------------------------------------------------------------------------------|---|
| Supplementary Info 1 – Additional Tables and Figures                                                                                                                                                                                                                                                                             | 2 |
| Table S1: Rotational and vibrational partition functions, as a function of temperature, for important stationary points on the $2\text{H}_4\text{SiO}_4 \rightarrow \text{H}_6\text{Si}_2\text{O}_7 + \text{H}_2\text{O}$ potential energy surface. Two four explicit waters are associated with each stationary point.          | 2 |
| <b>Figure S1:</b> The changes in the reaction barrier of the unimolecular $\text{H}_4\text{SiO}_4$ dimerization system, reaction (a), as a function of the number of explicit waters. The barriers are computed at the HF/6-31+G(d) level of theory and are inclusive of CPCM implicit solvation corrections.                    | 2 |
| <b>Table S2:</b> Pertinent rate parameters computed with conventional and variational transition state theory for reaction (a). Data for the hydrolysis reaction is given here. The reaction coordinate was followed <i>via</i> IRCmax calculations performed at both the HF/6-31+G(d) and DFT/B3LYP/6-31+G(d) levels of theory. | 3 |
| Supplementary Info II – Iterative fitting procedure for the derivation of acid/base kinetic parameters                                                                                                                                                                                                                           | 4 |
| Supplementary Info III – Structural parameters of pertinent stationary points used in the derivation of the kinetic model.                                                                                                                                                                                                       | 6 |

### Supplementary Info 1 – Additional Tables and Figures

**Table S1:** Rotational and vibrational partition functions, as a function of temperature, for important stationary points on the  $2\text{H}_4\text{SiO}_4 \rightarrow \text{H}_6\text{Si}_2\text{O}_7 + \text{H}_2\text{O}$  potential energy surface. Two four explicit waters are associated with each stationary point.

| Hydrolysis; HF/6-31+G(d) |            |             |                            |            |             |                            |
|--------------------------|------------|-------------|----------------------------|------------|-------------|----------------------------|
| T/ K                     | Q(rot - P) | Q(rot - TS) | Q(rot - TS)/<br>Q(rot - P) | Q(vib - P) | Q(vib - TS) | Q(vib - TS)/<br>Q(vib - P) |
| 300                      | 4.137E+06  | 3.796E+06   | 9.177E-01                  | 2.983E+11  | 9.460E+09   | 3.171E-02                  |
| 500                      | 8.901E+06  | 8.168E+06   | 9.177E-01                  | 9.957E+17  | 1.112E+16   | 1.117E-02                  |
| 800                      | 1.801E+07  | 1.653E+07   | 9.177E-01                  | 7.002E+25  | 3.394E+23   | 4.848E-03                  |

  

| Hydrolysis; B3LYP/6-31+G(d) |            |             |                            |            |             |                            |
|-----------------------------|------------|-------------|----------------------------|------------|-------------|----------------------------|
| T/ K                        | Q(rot - P) | Q(rot - TS) | Q(rot - TS)/<br>Q(rot - P) | Q(vib - P) | Q(vib - TS) | Q(vib - TS)/<br>Q(vib - P) |
| 300                         | 4.072E+06  | 3.689E+06   | 9.060E-01                  | 3.721E+10  | 8.392E+08   | 2.255E-02                  |
| 500                         | 8.761E+06  | 7.937E+06   | 9.060E-01                  | 7.718E+16  | 6.960E+14   | 9.018E-03                  |
| 800                         | 1.773E+07  | 1.606E+07   | 9.060E-01                  | 4.064E+24  | 1.846E+22   | 4.543E-03                  |

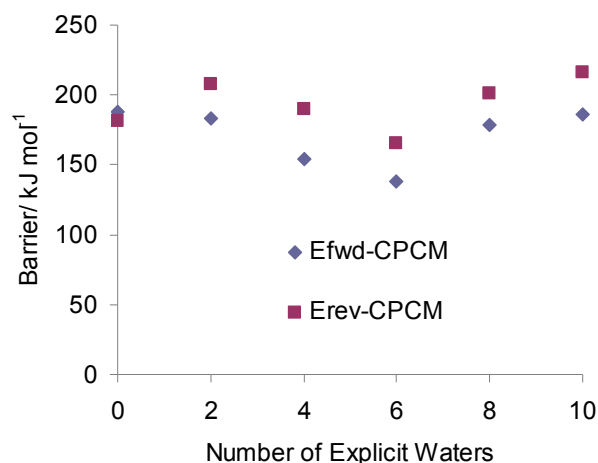

**Figure S1:** The changes in the reaction barrier of the unimolecular  $\text{H}_4\text{SiO}_4$  dimerization system, reaction (a), as a function of the number of explicit waters. The barriers are computed at the HF/6-31+G(d) level of theory and are inclusive of CPCM implicit solvation corrections.

**Table S2:** Pertinent rate parameters computed with conventional and variational transition state theory for reaction (a). Data for the hydrolysis reaction is given here. The reaction coordinate was followed *via* IRCmax calculations performed at both the HF/6-31+G(d) and DFT/B3LYP/6-31+G(d) levels of theory.

| HF/6-31+G(d)        |                                  |                             |                             |                        |                             |                        |
|---------------------|----------------------------------|-----------------------------|-----------------------------|------------------------|-----------------------------|------------------------|
| Hydrolysis          |                                  |                             |                             |                        |                             |                        |
| No.<br>water        | $E(s_{\min})/\text{kJ mol}^{-1}$ | $E(s=0)/\text{kJ mol}^{-1}$ | $A(s_{\min})/\text{s}^{-1}$ | $A(s=0)/\text{s}^{-1}$ | $k(s_{\min})/\text{s}^{-1}$ | $k(s=0)/\text{s}^{-1}$ |
| 0                   | 185.0                            | 184.9                       | $1.09 \times 10^{10}$       | $1.07 \times 10^{10}$  | 6.60E-23                    | 6.74E-23               |
| 2                   | 196.2                            | 196.1                       | $3.07 \times 10^{11}$       | $3.21 \times 10^{11}$  | 2.04E-23                    | 2.28E-23               |
| 4                   | 192.5                            | 192.5                       | $1.82 \times 10^{11}$       | $1.83 \times 10^{11}$  | 5.33E-23                    | 5.43E-23               |
| 6                   | 171.9                            | 171.9                       | $3.36 \times 10^{11}$       | $3.38 \times 10^{11}$  | 3.97E-19                    | 4.03E-19               |
| DFT/B3LYP/6-31+G(d) |                                  |                             |                             |                        |                             |                        |
| Hydrolysis          |                                  |                             |                             |                        |                             |                        |
| 0                   | 126.3                            | 126.2                       | $4.55 \times 10^9$          | $4.57 \times 10^9$     | $4.81 \times 10^{-13}$      | $4.92 \times 10^{-13}$ |
| 2                   | 148.7                            | 148.7                       | $3.40 \times 10^{11}$       | $3.37 \times 10^{11}$  | $4.24 \times 10^{-15}$      | $4.40 \times 10^{-15}$ |
| 4                   | 139.3                            | 139.3                       | $1.29 \times 10^{11}$       | $1.28 \times 10^{11}$  | $6.94 \times 10^{-14}$      | $7.00 \times 10^{-14}$ |
| 6                   | 111.8                            | 111.5                       | $1.01 \times 10^{12}$       | $9.47 \times 10^{11}$  | $3.41 \times 10^{-8}$       | $3.61 \times 10^{-8}$  |

## Supplementary Info II – Iterative fitting procedure for the derivation of acid/base kinetic parameters

The following is a script, in the Python programming language, for the derivation of the kinetic parameters for proton loss from H<sub>2</sub>O, H<sub>4</sub>SiO<sub>4</sub>, and H<sub>6</sub>Si<sub>2</sub>O<sub>7</sub>.

```
##From Henley, 1984:
##
##H4SiO4 <=> H3SiO4- + H+
##T/ K   273   298   400   500   573
##pK1    10.28  9.82  8.97  8.89  9.22
##
##Assuming equilibrium constants take on a similar non-Arrhenius form as
##rate constants do, i.e. AT^nexp(-Ea/RT), one finds:
##ln K(Ti) = lnA + nlnTi - Ea/R * 1/Ti
##
##To use the five data points provided, iterative solution for A, n and Ea may
##be possible using (ignore 273 - not interested in around 0 C:
##  n = [lnK(T3)-lnK(T2) - Ea/T(1/T2 - 1/T3)]/[ln(T3)-ln(T2)]      (1)
##  lnA = lnK(T4) - nlnT4 + Ea/R * 1/T4                        (2)
##  E = R*T5 * [lnA - lnK(T5) + ln(T4)]                        (3)
##
##Following the following steps:
## (a) Guess Ea
## (b) Use (1) to find n
## (c) Use (2) to find A
## (d) Use (3) to find Ea_2
## (e) If |Ea - Ea_2| < tol, print A, n, and Ea;
##     Otherwise, use Ea_2 in place of Ea in step (a) and repeat.
##
## Enter guess of Ea/ J mol-1 below:
E = 300
## Enter tolerance, in J mol-1
tol = 1e-7
## Enter max number of iteration cycles:
k = 5000

import math

##expt data
T1 = 273.0
pK_T1 = 10.28
T2 = 298.0
pK_T2 = 9.82
T3 = 400.0
pK_T3 = 8.97
```

```
T4 = 500.0
pK_T4 = 8.89
T5 = 573.0
pK_T5 = 9.22

R = 8.314472e-3          # kJ K-1 mol-1

lnK_1 = math.log(pow(10, - pK_T1))
lnK_2 = math.log(pow(10, - pK_T2)) # skip this temp?
lnK_3 = math.log(pow(10, - pK_T3))
lnK_4 = math.log(pow(10, - pK_T4))
lnK_5 = math.log(pow(10, - pK_T5))

for _ in range(k):
    n = (lnK_3-lnK_2 - E/R * (1/T2 - 1/T3))/(math.log(T3)-math.log(T2))
    A = math.exp(lnK_4 - n * math.log(T4) + E/R * (1/T4))
    E_2 = R * T5 * (math.log(A) - lnK_5 + n*math.log(T5))
    deltaE = abs(E - E_2)
    print "A = ", A
    print "n = ", n
    print "Ea = ", E_2
    if deltaE < tol:
        print ' '
        print '*****'
        print 'KINETIC PARAMETERS: '
        print "K(T) = AT^nexp(-Ea/RT)"
        print "A = ", A, " L-mol-s"
        print "n = ", n
        print "Ea = ", E_2, "kJ mol-1"
        print '*****'
        break
    else:
        E = E_2
        print "Not converged yet"
```

### Supplementary Info III – Structural parameters of pertinent stationary points used in the derivation of the kinetic model.

#### $\text{H}_3\text{SiO}_4^-$ (no explicit solvation)

Parameters from the HF/6-31+G(d) level of theory

Mass/ a.m.u.    Energy a.u.    ZPE a.u.  
94.98006        -590.2988786    0.048943

Rotational constant/  $\text{cm}^{-1}$

0.135779933463    0.135765590207    0.133381607619

Rotational symmetry number

1.0

Non-imaginary Vibrational Frequencies/  $\text{cm}^{-1}$

[ 150.31535572    151.34400845    161.83904647    331.39298843  
  331.40688914    383.40945498    431.94379303    432.02024695  
  757.49848216    870.21936065    870.30971528    982.07839496  
  982.08534531    1019.96478715    1208.52100324    4139.43760282  
  4139.46540424    4140.25079451]

Ground State Electronic Degeneracy and Irreducible Representation

2    (E)

Input orientation:

| Center<br>Number | Atomic<br>Number | Atomic<br>Type | Coordinates (Angstroms) |           |           |
|------------------|------------------|----------------|-------------------------|-----------|-----------|
|                  |                  |                | X                       | Y         | Z         |
| 1                | 14               | 0              | 0.013041                | 0.059637  | -0.048506 |
| 2                | 8                | 0              | -0.303129               | -0.754870 | 1.229654  |
| 3                | 8                | 0              | -0.754394               | 1.551879  | -0.134078 |
| 4                | 1                | 0              | -1.052122               | 1.797810  | 0.729769  |
| 5                | 8                | 0              | -0.416722               | -0.698290 | -1.485070 |
| 6                | 1                | 0              | -1.036207               | -1.388846 | -1.298736 |
| 7                | 8                | 0              | 1.638655                | 0.429075  | -0.258019 |
| 8                | 1                | 0              | 2.159761                | -0.142507 | 0.287045  |

#### $\text{H}_3\text{SiO}_4^-$ (Tetrahydrate)

Parameters from the HF/6-31+G(d) level of theory

Mass/ a.m.u.    Energy a.u.    ZPE a.u.  
167.02232        -894.4970702    0.157418

Rotational constant/  $\text{cm}^{-1}$

0.0346142797228    0.0223271127121    0.0197116366416

Rotational symmetry number

1.0

Vibrational Frequencies/  $\text{cm}^{-1}$

[ 8.96595963    16.6044012    27.58596416    33.42426345  
  60.89207155    62.51150457    75.07079841    112.09534642  
  146.95138327    148.26500061    188.22259898    202.1997655  
  222.92572799    236.87509309    242.15041352    313.79468627  
  344.08433903    351.45171671    376.9178222    389.49101674  
  399.54123196    413.55315026    428.72577806    446.98436406  
  456.77741609    461.18394199    521.79799929    558.76694445  
  674.4208733    789.08785155    815.34629765    866.66077822  
  893.78801887    913.58958397    914.44447779    971.62505908  
  1108.31076609    1109.68693664    1191.17291391    1872.7526542

```
1874.01066869 1874.53889577 1892.98514139 3702.03778009
3729.39438249 3870.53526789 4028.59332053 4064.61006688
4068.38411035 4102.64241656 4114.77773866 4133.70355887
4136.21263749 4137.38029735]
```

Ground State Electronic Degeneracy and Irreducible Representation

1 ) (A)

Input orientation:

| Center<br>Number | Atomic<br>Number | Atomic<br>Type | Coordinates (Angstroms) |           |           |
|------------------|------------------|----------------|-------------------------|-----------|-----------|
|                  |                  |                | X                       | Y         | Z         |
| 1                | 14               | 0              | -0.177732               | -0.233008 | 0.122582  |
| 2                | 8                | 0              | -1.383273               | -0.898603 | 1.060157  |
| 3                | 1                | 0              | -1.080683               | -1.139958 | 1.929341  |
| 4                | 8                | 0              | -0.899679               | 1.086974  | -0.592779 |
| 5                | 1                | 0              | -0.350452               | 1.863526  | -0.567810 |
| 6                | 8                | 0              | 1.134304                | 0.101077  | 0.907626  |
| 7                | 8                | 0              | 0.097136                | -1.324596 | -1.108151 |
| 8                | 1                | 0              | -0.669244               | -1.559593 | -1.611838 |
| 9                | 1                | 0              | 1.606596                | 1.807387  | 0.553562  |
| 10               | 8                | 0              | 1.701839                | 2.668657  | 0.120401  |
| 11               | 1                | 0              | 2.389160                | 2.541464  | -0.518809 |
| 12               | 1                | 0              | -3.296664               | -0.375682 | 0.218511  |
| 13               | 8                | 0              | -3.711078               | 0.132090  | -0.472342 |
| 14               | 1                | 0              | -3.023642               | 0.744843  | -0.714979 |
| 15               | 1                | 0              | 2.564030                | -1.780875 | -0.938455 |
| 16               | 8                | 0              | 3.188145                | -1.418623 | -0.321685 |
| 17               | 1                | 0              | 2.635187                | -0.840552 | 0.212445  |
| 18               | 8                | 0              | 0.769859                | -1.170751 | 3.312539  |
| 19               | 1                | 0              | 1.299421                | -1.950198 | 3.216940  |
| 20               | 1                | 0              | 1.019953                | -0.610135 | 2.563067  |

#### H<sub>4</sub>SiO<sub>4</sub> (no explicit solvation)

Parameters from the HF/6-31+G(d) level of theory

Mass/ a.m.u. Energy a.u. ZPE a.u.  
95.98789 -590.8664147 0.060759

Rotational constant/ cm<sup>-1</sup>  
0.137108519254 0.131740138706 0.12813130876

Rotational symmetry number  
1.0

Vibrational Frequencies/ cm<sup>-1</sup>

```
[ 65.78512239 271.12644894 278.73013873 306.67057106
369.57129559 370.98916827 382.45725617 394.02264905
405.70619799 795.99650571 915.07696022 927.51114764
958.5166871 969.23413651 977.69967049 1016.35060188
1071.05685632 4008.51374118 4009.66750032 4027.75232742
4147.87533537]
```

Ground State Electronic Degeneracy and Irreducible Representation

1 ) (A)

Input orientation:

| Center<br>Number | Atomic<br>Number | Atomic<br>Type | Coordinates (Angstroms) |          |          |
|------------------|------------------|----------------|-------------------------|----------|----------|
|                  |                  |                | X                       | Y        | Z        |
| 1                | 14               | 0              | 0.081717                | 0.044517 | 0.145100 |

|                                                                   |        |        |                         |           |           |
|-------------------------------------------------------------------|--------|--------|-------------------------|-----------|-----------|
| 2                                                                 | 8      | 0      | -0.301038               | -0.786756 | 1.497397  |
| 3                                                                 | 1      | 0      | -1.230575               | -0.935487 | 1.637051  |
| 4                                                                 | 8      | 0      | -0.578716               | 1.537650  | 0.121014  |
| 5                                                                 | 1      | 0      | -1.529312               | 1.565302  | 0.156501  |
| 6                                                                 | 8      | 0      | -0.168678               | -0.803941 | -1.237103 |
| 7                                                                 | 1      | 0      | -1.073197               | -1.026986 | -1.430925 |
| 8                                                                 | 8      | 0      | 1.712798                | 0.253047  | 0.168040  |
| 9                                                                 | 1      | 0      | 2.145933                | -0.137351 | -0.577075 |
| -----                                                             |        |        |                         |           |           |
| <b>H<sub>4</sub>SiO<sub>4</sub> (Tetrahydrate)</b>                |        |        |                         |           |           |
| Parameters from the HF/6-31+G(d) level of theory                  |        |        |                         |           |           |
| Mass/ a.m.u. Energy a.u. ZPE a.u.                                 |        |        |                         |           |           |
| 168.03015 -895.033739 0.170188                                    |        |        |                         |           |           |
| Rotational constant/ cm <sup>-1</sup>                             |        |        |                         |           |           |
| 0.0400166838086 0.0199965003789 0.0157949270358                   |        |        |                         |           |           |
| Rotational symmetry number                                        |        |        |                         |           |           |
| 1.0                                                               |        |        |                         |           |           |
| Vibrational Frequencies/ cm <sup>-1</sup>                         |        |        |                         |           |           |
| [ 20.90667175 25.74411974 30.95688696 46.29632332                 |        |        |                         |           |           |
| 80.51292739 113.36726162 138.38854431 148.91138375                |        |        |                         |           |           |
| 158.30826546 184.39990302 185.40770468 192.16345101               |        |        |                         |           |           |
| 197.35536716 209.40033463 223.91267859 237.88984511               |        |        |                         |           |           |
| 265.98318528 279.94645109 310.88943734 323.97695825               |        |        |                         |           |           |
| 362.94065567 389.77598135 401.1398139 417.43144907                |        |        |                         |           |           |
| 445.42748425 459.69656574 548.70977888 576.1914877                |        |        |                         |           |           |
| 642.24767398 685.40938661 694.26414054 731.58755387               |        |        |                         |           |           |
| 811.25253779 856.50630767 943.53171891 961.03271608               |        |        |                         |           |           |
| 989.82804223 1055.88422851 1128.37644473 1162.98226875            |        |        |                         |           |           |
| 1206.15093174 1820.23576199 1823.23831591 1834.44229027           |        |        |                         |           |           |
| 1851.95023779 3887.82775437 3939.865072 3953.97429529             |        |        |                         |           |           |
| 3976.40309507 3982.13713902 4012.85771387 4025.56991554           |        |        |                         |           |           |
| 4126.37093297 4149.52952017 4151.58682563 4159.97590569           |        |        |                         |           |           |
| 4162.95760854]                                                    |        |        |                         |           |           |
| Ground State Electronic Degeneracy and Irreducible Representation |        |        |                         |           |           |
| 1 ) (A)                                                           |        |        |                         |           |           |
| Input orientation:                                                |        |        |                         |           |           |
| -----                                                             |        |        |                         |           |           |
| Center                                                            | Atomic | Atomic | Coordinates (Angstroms) |           |           |
| Number                                                            | Number | Type   | X                       | Y         | Z         |
| -----                                                             |        |        |                         |           |           |
| 1                                                                 | 14     | 0      | -0.542811               | 0.126488  | -0.037786 |
| 2                                                                 | 8      | 0      | -0.735359               | -0.321910 | 1.497656  |
| 3                                                                 | 1      | 0      | -0.004135               | -0.618770 | 2.042465  |
| 4                                                                 | 8      | 0      | 0.840644                | 0.990792  | -0.179738 |
| 5                                                                 | 1      | 0      | 1.245585                | 0.973119  | -1.046714 |
| 6                                                                 | 8      | 0      | -0.446519               | -1.057171 | -1.158983 |
| 7                                                                 | 1      | 0      | -1.273262               | -1.424836 | -1.466431 |
| 8                                                                 | 8      | 0      | -1.899243               | 0.981722  | -0.421511 |
| 9                                                                 | 1      | 0      | -2.233212               | 1.557077  | 0.253792  |
| 10                                                                | 1      | 0      | 1.060500                | -0.586049 | -2.556210 |
| 11                                                                | 8      | 0      | 1.691376                | 0.104607  | -2.744680 |
| 12                                                                | 1      | 0      | 1.542432                | 0.382978  | -3.638087 |
| 13                                                                | 1      | 0      | -3.184026               | -0.304551 | -1.556186 |
| 14                                                                | 8      | 0      | -3.187551               | -1.179511 | -1.934435 |
| 15                                                                | 1      | 0      | -3.942964               | -1.632696 | -1.585207 |
| 16                                                                | 1      | 0      | 2.217812                | 1.288200  | 1.182656  |
| 17                                                                | 8      | 0      | 2.859418                | 1.230382  | 1.890009  |
| 18                                                                | 1      | 0      | 3.710821                | 1.165232  | 1.478990  |



|    |   |   |          |           |          |
|----|---|---|----------|-----------|----------|
| 19 | 8 | 0 | 1.498568 | -0.931985 | 3.115135 |
| 20 | 1 | 0 | 1.382250 | -0.868091 | 4.053304 |
| 21 | 1 | 0 | 2.106873 | -0.237857 | 2.859017 |

**2 - H<sub>3</sub>SiO<sub>4</sub><sup>-</sup>/H<sub>4</sub>SiO<sub>4</sub> H-bonded dimer (no explicit solvation)**

Parameters from the HF/6-31+G(d) level of theory

Mass/ a.m.u. Energy a.u. ZPE a.u.  
 190.96795 -1181.290346 0.11447

Rotational constant/ cm<sup>-1</sup>

0.0673862849478 0.0158462959065 0.0157508965753

Rotational symmetry number

1.0

Vibrational Frequencies/ cm<sup>-1</sup>

[ 22.07433161 47.85320313 69.96228652 89.08966706  
 98.27803809 115.91109203 121.77719275 137.87421794  
 157.80783981 162.08925929 304.89127985 322.11426276  
 328.68929982 350.35356041 381.74831982 398.6585367  
 412.58705073 419.87102414 431.44336738 459.85642393  
 623.3496552 748.84528857 778.66926745 801.86955679  
 829.43466988 869.72588535 887.89411672 931.0002265  
 951.70533792 958.61399208 963.16647546 973.64066241  
 995.78449758 1041.28848028 1127.15318202 1151.54198228  
 1181.76908184 1303.29606176 3846.13951728 3878.83399332  
 3983.94423166 4140.45930519 4147.0273919 4147.75022895  
 4150.75973323]

Ground State Electronic Degeneracy and Irreducible Representation

1 ) (A)

Cartesian Coordinates

Input orientation:

| Center Number | Atomic Number | Atomic Type | Coordinates (Angstroms) |           |           |
|---------------|---------------|-------------|-------------------------|-----------|-----------|
|               |               |             | X                       | Y         | Z         |
| 1             | 14            | 0           | -2.003179               | -0.082905 | 0.013426  |
| 2             | 14            | 0           | 2.052899                | 0.023282  | -0.008382 |
| 3             | 8             | 0           | 1.589652                | -0.605382 | 1.431473  |
| 4             | 1             | 0           | 0.691070                | -0.937935 | 1.340825  |
| 5             | 8             | 0           | 1.521589                | 1.545333  | -0.246758 |
| 6             | 1             | 0           | 0.572719                | 1.647176  | -0.300639 |
| 7             | 8             | 0           | 1.595146                | -1.004984 | -1.196957 |
| 8             | 1             | 0           | 0.691674                | -1.286760 | -1.023986 |
| 9             | 8             | 0           | 3.692705                | 0.154076  | -0.013817 |
| 10            | 1             | 0           | 4.144699                | -0.652904 | 0.183723  |
| 11            | 8             | 0           | -3.076848               | -0.407534 | -1.216399 |
| 12            | 1             | 0           | -2.792792               | -1.133530 | -1.752480 |
| 13            | 8             | 0           | -0.825688               | -1.086058 | 0.162394  |
| 14            | 8             | 0           | -1.421397               | 1.463270  | -0.296920 |
| 15            | 1             | 0           | -2.080973               | 2.134727  | -0.392358 |
| 16            | 8             | 0           | -2.996892               | 0.085757  | 1.341762  |
| 17            | 1             | 0           | -2.548612               | -0.091876 | 2.156075  |

**2 - H<sub>3</sub>SiO<sub>4</sub><sup>-</sup>/H<sub>4</sub>SiO<sub>4</sub> H-bonded dimer (Octahydrate)**

Parameters from the HF/6-31+G(d) level of theory

Mass/ a.m.u. Energy a.u. ZPE a.u.  
 335.05247 -1789.584477 0.335384

Rotational constant/ cm<sup>-1</sup>

0.00994821557519 0.00534036116412 0.00450978656708

Rotational symmetry number

1.0

Vibrational Frequencies/  $\text{cm}^{-1}$

```
[ 15.91631593 18.43234491 26.80752425 29.81007817
 36.52412236 39.29036417 41.71603852 49.93135967
 50.52909031 60.18313521 60.92682333 69.53136443
 95.35193809 99.3275419 108.73137397 116.63392908
 139.56315452 141.87067281 148.54301486 158.91294646
 164.11181298 167.0657144 173.38358828 174.53039707
 177.3244403 180.19493746 188.55621609 195.86104056
 203.48558142 212.66700209 218.08828001 230.5433185
 236.95849737 250.43523823 259.3942475 299.33099481
 319.51482951 329.1063212 340.03228131 351.61852526
 367.23597587 390.18605237 399.25626735 411.03017092
 420.93442865 429.38606191 436.45457427 445.23287428
 450.73060611 457.23613961 477.5798325 492.41189285
 497.63856079 502.15629238 510.03104607 544.93573541
 582.16879412 649.95561912 657.99718136 669.31931177
 678.70924314 713.52357785 728.16797857 735.27819307
 769.46699571 804.12147223 812.21863732 843.84970884
 856.66616586 864.22120316 872.69368749 910.4827747
 921.70760013 952.28916785 966.39144078 978.40165647
 984.05229615 1003.15187526 1006.07797526 1099.45601216
 1114.93445565 1152.21616684 1187.78114004 1217.15334576
 1225.25051085 1349.5089808 1857.62867889 1859.41492046
 1861.82669409 1869.59024208 1876.10272594 1883.21294043
 1886.88967891 1907.62954212 3549.02568613 3701.8779219
 3766.48843407 3866.66391943 3885.86080354 3899.30279262
 3917.14435725 3922.46833017 3932.73400643 3970.50919293
 3980.30224495 3984.79912548 4017.06267943 4025.97303621
 4045.53828919 4089.64525028 4090.24298092 4128.92171374
 4139.84767384 4142.24554676 4144.40015722 4145.4844128
 4147.50696648]
```

Ground State Electronic Degeneracy and Irreducible Representation

1 ) (A)

Input orientation:

| Center<br>Number | Atomic<br>Number | Atomic<br>Type | Coordinates (Angstroms) |           |           |
|------------------|------------------|----------------|-------------------------|-----------|-----------|
|                  |                  |                | X                       | Y         | Z         |
| 1                | 14               | 0              | -1.982070               | 0.115574  | 0.544762  |
| 2                | 14               | 0              | 2.186651                | -1.013558 | -0.180381 |
| 3                | 8                | 0              | 1.612587                | 0.504869  | -0.038321 |
| 4                | 1                | 0              | 0.769793                | 0.573301  | 0.446802  |
| 5                | 8                | 0              | 1.018399                | -1.999797 | -0.782769 |
| 6                | 1                | 0              | 0.105310                | -1.703244 | -0.776630 |
| 7                | 8                | 0              | 2.713917                | -1.629045 | 1.245634  |
| 8                | 1                | 0              | 2.110558                | -1.552800 | 1.986962  |
| 9                | 8                | 0              | 3.461119                | -0.977996 | -1.187933 |
| 10               | 1                | 0              | 4.056389                | -1.719625 | -1.116779 |
| 11               | 8                | 0              | -3.236210               | -0.567979 | 1.404128  |
| 12               | 1                | 0              | -3.618412               | -0.012235 | 2.068412  |
| 13               | 8                | 0              | -0.688578               | 0.487586  | 1.354111  |
| 14               | 8                | 0              | -1.648966               | -1.042148 | -0.593449 |
| 15               | 1                | 0              | -2.409974               | -1.462794 | -0.986781 |
| 16               | 8                | 0              | -2.685775               | 1.420456  | -0.197663 |
| 17               | 1                | 0              | -2.142905               | 2.204529  | -0.308429 |
| 18               | 8                | 0              | -4.965227               | 0.960723  | -1.806028 |
| 19               | 1                | 0              | -4.243122               | 1.233499  | -1.233597 |
| 20               | 1                | 0              | -4.690159               | 1.181752  | -2.685085 |
| 21               | 8                | 0              | 4.490235                | -3.556565 | -0.162968 |
| 22               | 1                | 0              | 3.776096                | -4.114374 | -0.464325 |

|    |   |   |           |           |           |
|----|---|---|-----------|-----------|-----------|
| 23 | 1 | 0 | 4.165498  | -3.154265 | 0.636770  |
| 24 | 8 | 0 | 0.074948  | 2.991942  | 2.240335  |
| 25 | 1 | 0 | -0.250582 | 2.109367  | 2.017261  |
| 26 | 1 | 0 | 1.015836  | 2.946295  | 2.134023  |
| 27 | 8 | 0 | 1.473428  | 2.796314  | -1.722497 |
| 28 | 1 | 0 | 1.645015  | 2.024307  | -1.179766 |
| 29 | 1 | 0 | 1.509916  | 2.492270  | -2.618842 |
| 30 | 8 | 0 | -4.458635 | -1.832700 | -1.016126 |
| 31 | 1 | 0 | -4.796543 | -1.011364 | -1.367277 |
| 32 | 1 | 0 | -4.409841 | -1.696393 | -0.075049 |
| 33 | 8 | 0 | -0.996526 | 3.721053  | -0.401249 |
| 34 | 1 | 0 | -0.233068 | 3.514613  | -0.936966 |
| 35 | 1 | 0 | -0.677089 | 3.725385  | 0.499047  |
| 36 | 8 | 0 | 1.871078  | -4.724553 | -0.910754 |
| 37 | 1 | 0 | 1.484396  | -3.851460 | -0.997857 |
| 38 | 1 | 0 | 1.419664  | -5.126293 | -0.180989 |
| 39 | 8 | 0 | 0.676756  | -1.044736 | 3.177132  |
| 40 | 1 | 0 | 0.909135  | -0.440780 | 3.868673  |
| 41 | 1 | 0 | 0.092137  | -0.549881 | 2.583144  |

### TS3 - H<sub>3</sub>SiO<sub>4</sub><sup>-</sup>-H<sub>4</sub>SiO<sub>4</sub> Si-O bond formation TS (no explicit solvation)

Parameters from the HF/6-31+G(d) level of theory

Mass/ a.m.u. Energy a.u. ZPE a.u.  
 190.96795 -1181.282711 0.115723

Rotational constant/ cm<sup>-1</sup>

0.0644028876804 0.017530127459 0.0173169800022

Rotational symmetry number

1.0

Imaginary Frequency/ cm<sup>-1</sup>

-136.9256

Non-imaginary Vibrational Frequencies/ cm<sup>-1</sup>

[ 24.94482876 48.17986988 85.78824782 130.57634382  
 179.88912178 182.29394506 200.13550968 211.25607976  
 280.90560026 313.106601 328.87695944 342.36760102  
 360.00760532 370.46789155 403.67669395 418.27939254  
 439.59613532 450.80706003 463.99883629 634.15050889  
 686.20172723 738.63521516 770.64855628 797.10161236  
 827.71793187 893.6073096 907.51497256 932.80036878  
 986.91584294 990.36321967 1012.17343774 1016.89272967  
 1065.01004634 1091.94962736 1104.80778652 1163.95531864  
 1243.55079899 4027.9469374 4035.44637184 4044.62779252  
 4131.46554414 4149.82838549 4151.91349238 4155.92384796]

Ground State Electronic Degeneracy and Irreducible Representation

1 ) (A)

Cartesian Coordinates

Input orientation:

| Center Number | Atomic Number | Atomic Type | Coordinates (Angstroms) |           |          |
|---------------|---------------|-------------|-------------------------|-----------|----------|
|               |               |             | X                       | Y         | Z        |
| 1             | 14            | 0           | 0.000000                | 0.000000  | 0.000000 |
| 2             | 14            | 0           | 0.000000                | 0.000000  | 3.694351 |
| 3             | 8             | 0           | 1.637504                | 0.000000  | 3.658692 |
| 4             | 1             | 0           | 1.889252                | -0.210699 | 2.763979 |
| 5             | 8             | 0           | -0.742804               | -1.449092 | 3.492160 |
| 6             | 1             | 0           | -0.565081               | -1.737197 | 2.600582 |
| 7             | 8             | 0           | -0.737170               | 1.342397  | 3.047917 |
| 8             | 1             | 0           | -1.154261               | 1.845408  | 3.734093 |
| 9             | 8             | 0           | -0.348392               | 0.313397  | 5.306446 |

|                                                                                                                         |        |        |                         |           |           |
|-------------------------------------------------------------------------------------------------------------------------|--------|--------|-------------------------|-----------|-----------|
| 10                                                                                                                      | 1      | 0      | -0.304327               | -0.447869 | 5.865365  |
| 11                                                                                                                      | 8      | 0      | -0.911506               | 1.381047  | 0.136665  |
| 12                                                                                                                      | 1      | 0      | -0.960338               | 1.636272  | 1.053753  |
| 13                                                                                                                      | 8      | 0      | 0.483994                | -0.519798 | 1.401850  |
| 14                                                                                                                      | 8      | 0      | -0.980140               | -1.014907 | -0.883651 |
| 15                                                                                                                      | 1      | 0      | -1.871787               | -0.701987 | -0.922250 |
| 16                                                                                                                      | 8      | 0      | 1.288917                | 0.278317  | -1.016412 |
| 17                                                                                                                      | 1      | 0      | 2.106837                | 0.273778  | -0.541615 |
| -----                                                                                                                   |        |        |                         |           |           |
| <b>TS3 - H<sub>3</sub>SiO<sub>4</sub><sup>-</sup>-H<sub>4</sub>SiO<sub>4</sub> Si-O bond formation TS (Octahydrate)</b> |        |        |                         |           |           |
| Parameters from the HF/6-31+G(d) level of theory                                                                        |        |        |                         |           |           |
| Mass/ a.m.u. Energy a.u. ZPE a.u.                                                                                       |        |        |                         |           |           |
| 335.05247 -1789.553895 0.334457                                                                                         |        |        |                         |           |           |
| Rotational constant/ cm <sup>-1</sup>                                                                                   |        |        |                         |           |           |
| 0.00951458225143 0.00653985765045 0.00539806775259                                                                      |        |        |                         |           |           |
| Rotational symmetry number                                                                                              |        |        |                         |           |           |
| 1.0                                                                                                                     |        |        |                         |           |           |
| Imaginary Frequency/ cm <sup>-1</sup>                                                                                   |        |        |                         |           |           |
| -157.8598                                                                                                               |        |        |                         |           |           |
| Non-imaginary Vibrational Frequencies/ cm <sup>-1</sup>                                                                 |        |        |                         |           |           |
| [ 15.64525203 22.18553731 29.15674468 32.11064611                                                                       |        |        |                         |           |           |
| 36.13490241 40.86809505 45.51788341 49.68809719                                                                         |        |        |                         |           |           |
| 53.3926371 58.65405682 60.8364687 74.86228772                                                                           |        |        |                         |           |           |
| 83.54328274 96.97137111 101.23193952 111.47676471                                                                       |        |        |                         |           |           |
| 119.83804334 126.81620107 128.71364834 133.30783385                                                                     |        |        |                         |           |           |
| 143.20514122 148.584717 160.33081915 168.56004101                                                                       |        |        |                         |           |           |
| 181.99507974 187.47891086 198.54387809 206.88430565                                                                     |        |        |                         |           |           |
| 229.54941755 234.12275199 238.75863965 270.51481759                                                                     |        |        |                         |           |           |
| 279.96730216 284.13751594 293.07567414 301.26319386                                                                     |        |        |                         |           |           |
| 309.79128104 320.6129858 329.27312975 346.92703476                                                                      |        |        |                         |           |           |
| 359.79909463 364.7338476 376.3756944 387.98973978                                                                       |        |        |                         |           |           |
| 416.1386828 425.36180561 438.09485836 441.47968187                                                                      |        |        |                         |           |           |
| 450.16762725 451.68280492 462.81727572 476.73883939                                                                     |        |        |                         |           |           |
| 497.0477805 500.09203656 524.65459573 552.08070169                                                                      |        |        |                         |           |           |
| 613.26468821 625.40001031 637.89675094 666.33760892                                                                     |        |        |                         |           |           |
| 675.92215026 687.45974172 723.38613344 737.19649141                                                                     |        |        |                         |           |           |
| 761.55053989 765.53309405 776.13933776 791.55522804                                                                     |        |        |                         |           |           |
| 808.97977128 823.01254065 847.97127013 884.91936423                                                                     |        |        |                         |           |           |
| 896.40135284 917.48873385 963.39583722 968.55995195                                                                     |        |        |                         |           |           |
| 993.9843553 1048.28053872 1087.39714398 1102.65317606                                                                   |        |        |                         |           |           |
| 1107.58097868 1145.15460484 1173.03248397 1196.21192223                                                                 |        |        |                         |           |           |
| 1229.54583105 1840.17633422 1844.65236367 1857.34371428                                                                 |        |        |                         |           |           |
| 1865.77449647 1871.98116465 1882.24684091 1885.90967868                                                                 |        |        |                         |           |           |
| 1890.28840315 3834.28915979 3884.7209451 3889.53754202                                                                  |        |        |                         |           |           |
| 3966.26947558 3968.82025634 3980.11458533 3996.50352549                                                                 |        |        |                         |           |           |
| 4000.3192711 4007.96466303 4019.54395663 4031.65842766                                                                  |        |        |                         |           |           |
| 4040.48538016 4055.82481652 4061.19744194 4071.69943031                                                                 |        |        |                         |           |           |
| 4083.53588709 4112.8316389 4117.89149829 4133.54370068                                                                  |        |        |                         |           |           |
| 4141.36285151 4142.55136244 4143.25334843 4151.32966245]                                                                |        |        |                         |           |           |
| Ground State Electronic Degeneracy and Irreducible Representation                                                       |        |        |                         |           |           |
| 1 ) (A)                                                                                                                 |        |        |                         |           |           |
| Input orientation:                                                                                                      |        |        |                         |           |           |
| -----                                                                                                                   |        |        |                         |           |           |
| Center                                                                                                                  | Atomic | Atomic | Coordinates (Angstroms) |           |           |
| Number                                                                                                                  | Number | Type   | X                       | Y         | Z         |
| -----                                                                                                                   |        |        |                         |           |           |
| 1                                                                                                                       | 14     | 0      | -2.219704               | 0.539129  | 0.254031  |
| 2                                                                                                                       | 14     | 0      | 1.438885                | -0.327347 | 0.255494  |
| 3                                                                                                                       | 8      | 0      | 0.648427                | -1.788635 | 0.205575  |

|    |   |   |           |           |           |
|----|---|---|-----------|-----------|-----------|
| 4  | 1 | 0 | -0.241328 | -1.638035 | 0.511309  |
| 5  | 8 | 0 | 1.630730  | 0.431465  | 1.698561  |
| 6  | 1 | 0 | 0.796150  | 0.810496  | 1.953007  |
| 7  | 8 | 0 | 1.255901  | 0.667247  | -1.037485 |
| 8  | 1 | 0 | 2.059023  | 0.788630  | -1.540462 |
| 9  | 8 | 0 | 3.008024  | -0.895484 | 0.003341  |
| 10 | 1 | 0 | 3.146318  | -1.815972 | 0.202272  |
| 11 | 8 | 0 | -2.902844 | 1.921836  | 0.793394  |
| 12 | 1 | 0 | -2.362486 | 2.707020  | 0.812497  |
| 13 | 8 | 0 | -0.771468 | 0.237551  | 0.829951  |
| 14 | 8 | 0 | -3.262099 | -0.695464 | 0.696492  |
| 15 | 1 | 0 | -3.187827 | -0.959514 | 1.606677  |
| 16 | 8 | 0 | -2.305495 | 0.572598  | -1.394902 |
| 17 | 1 | 0 | -1.866095 | -0.140262 | -1.853989 |
| 18 | 1 | 0 | -4.314557 | -2.436135 | -1.796099 |
| 19 | 8 | 0 | -3.684385 | -2.772068 | -1.173061 |
| 20 | 1 | 0 | -3.623270 | -2.101825 | -0.487490 |
| 21 | 1 | 0 | 1.740331  | -3.405880 | 0.332733  |
| 22 | 8 | 0 | 2.581577  | -3.859477 | 0.310004  |
| 23 | 1 | 0 | 2.628549  | -4.284232 | -0.535506 |
| 24 | 1 | 0 | -0.214613 | 3.868276  | 1.012174  |
| 25 | 8 | 0 | -0.966993 | 4.142139  | 0.505478  |
| 26 | 1 | 0 | -0.791144 | 3.847756  | -0.391299 |
| 27 | 1 | 0 | 0.127059  | 2.154381  | -1.691954 |
| 28 | 8 | 0 | -0.521081 | 2.801939  | -1.962666 |
| 29 | 1 | 0 | -1.317945 | 2.283728  | -2.043228 |
| 30 | 1 | 0 | 4.067115  | 0.073289  | -1.595627 |
| 31 | 8 | 0 | 4.070163  | 0.944146  | -1.979451 |
| 32 | 1 | 0 | 4.366934  | 1.501332  | -1.266389 |
| 33 | 1 | 0 | 3.880877  | 1.762369  | 1.541346  |
| 34 | 8 | 0 | 4.565374  | 1.362611  | 1.019342  |
| 35 | 1 | 0 | 4.238579  | 0.477826  | 0.874886  |
| 36 | 8 | 0 | -1.450546 | -1.080145 | 3.235161  |
| 37 | 1 | 0 | -1.111241 | -0.564207 | 2.497539  |
| 38 | 1 | 0 | -0.718935 | -1.577777 | 3.572888  |
| 39 | 8 | 0 | -1.153246 | -1.964324 | -2.379894 |
| 40 | 1 | 0 | -0.426196 | -2.051942 | -1.774128 |
| 41 | 1 | 0 | -1.889227 | -2.445439 | -2.006033 |

-----

### 3 – H<sub>7</sub>Si<sub>2</sub>O<sub>8</sub><sup>-</sup> (no explicit solvation)

Parameters from the HF/6-31+G(d) level of theory

Mass/ a.m.u.    Energy a.u.    ZPE a.u.  
 190.96795    -1181.300898    0.118957

Rotational constant/ cm<sup>-1</sup>

0.0626993758462    0.0212333560439    0.0209858514853

Rotational symmetry number

1.0

Vibrational Frequencies/ cm<sup>-1</sup>

[ 44.40582641    120.88059678    127.61549204    153.51946997  
 199.96175078    211.62444865    235.46417076    300.38744897  
 318.37497107    338.62830933    370.88491293    377.0290279  
 419.16903815    437.58748235    439.74904316    482.06281232  
 487.1713242    540.61261379    593.88709484    602.609792  
 612.16653191    629.79958585    656.10668445    681.85775454  
 722.01691325    840.22857321    864.83283452    883.10532123  
 924.77270726    954.22831726    1028.49287433    1035.70734417  
 1074.69884302    1084.03317153    1103.20920457    1141.20680246  
 1179.82993243    1214.99178495    4001.59813666    4012.53104712  
 4150.95434321    4152.31661304    4153.39391827    4154.49207457  
 4158.04370664]

Ground State Electronic Degeneracy and Irreducible Representation

1 ) (A)

Input orientation:

| Center<br>Number | Atomic<br>Number | Atomic<br>Type | Coordinates (Angstroms) |           |           |
|------------------|------------------|----------------|-------------------------|-----------|-----------|
|                  |                  |                | X                       | Y         | Z         |
| 1                | 14               | 0              | -1.515386               | -0.109339 | 0.511446  |
| 2                | 14               | 0              | 1.385448                | -0.662389 | -0.304102 |
| 3                | 8                | 0              | 1.034935                | 0.753688  | -1.174689 |
| 4                | 1                | 0              | 1.847975                | 1.156734  | -1.442367 |
| 5                | 8                | 0              | 1.574616                | -2.160394 | -1.055044 |
| 6                | 1                | 0              | 0.738983                | -2.602020 | -1.094006 |
| 7                | 8                | 0              | 1.525543                | -0.467960 | 1.375680  |
| 8                | 1                | 0              | 2.430078                | -0.293526 | 1.591267  |
| 9                | 8                | 0              | 3.120302                | -0.371854 | -0.503828 |
| 10               | 1                | 0              | 3.534375                | -1.109077 | -0.926405 |
| 11               | 8                | 0              | -3.001599               | -0.821733 | 0.422754  |
| 12               | 1                | 0              | -3.499300               | -0.542048 | -0.331297 |
| 13               | 8                | 0              | -0.335026               | -0.977916 | -0.125898 |
| 14               | 8                | 0              | -1.679105               | 1.294652  | -0.340018 |
| 15               | 1                | 0              | -0.870464               | 1.470264  | -0.817051 |
| 16               | 8                | 0              | -1.221967               | 0.134268  | 2.105466  |
| 17               | 1                | 0              | -0.298849               | -0.030831 | 2.284365  |

**3 – H<sub>7</sub>Si<sub>2</sub>O<sub>8</sub><sup>-</sup> (Octahydrate)**

Parameters from the HF/6-31+G(d) level of theory

Mass/ a.m.u.    Energy a.u.    ZPE a.u.  
335.05247       -1789.572058    0.335061

Rotational constant/ cm<sup>-1</sup>

0.00850655155574    0.00727670073675    0.00545343939239

Rotational symmetry number

1.0

Vibrational Frequencies/ cm<sup>-1</sup>

|   |               |               |               |               |
|---|---------------|---------------|---------------|---------------|
| [ | 10.76610191   | 17.2090822    | 28.32270193   | 30.86653233   |
|   | 36.72568269   | 40.70823685   | 47.49873496   | 48.83320337   |
|   | 56.64540385   | 64.08923545   | 70.80327964   | 73.00654258   |
|   | 90.37548298   | 94.83066137   | 111.26130366  | 117.27336186  |
|   | 125.15506591  | 127.26102387  | 132.00811722  | 139.2642892   |
|   | 157.02244955  | 159.99025169  | 163.25691915  | 167.76770039  |
|   | 178.77706477  | 185.27564791  | 193.73423153  | 213.91806623  |
|   | 222.24459308  | 228.73622586  | 235.74218501  | 258.92162328  |
|   | 268.45751212  | 282.42772829  | 286.85510525  | 298.85142022  |
|   | 309.65922427  | 320.73809222  | 332.71355612  | 361.7590951   |
|   | 368.89711102  | 373.99172219  | 394.33541509  | 403.89910536  |
|   | 417.55655549  | 418.52265501  | 426.03599017  | 428.100246    |
|   | 447.7419529   | 455.95032369  | 474.40351967  | 478.47642846  |
|   | 487.96366481  | 496.70721304  | 501.09983822  | 532.04977483  |
|   | 544.49786297  | 563.04141358  | 578.90212666  | 614.39759628  |
|   | 645.13207185  | 654.10498183  | 671.79363862  | 680.39817972  |
|   | 688.44669231  | 698.29534719  | 711.85549233  | 749.67933132  |
|   | 767.27068312  | 793.73763991  | 803.96856439  | 829.78913805  |
|   | 857.76432216  | 879.22702242  | 886.36503834  | 904.59582291  |
|   | 966.09257546  | 1002.51939284 | 1044.31188527 | 1090.01047795 |
|   | 1110.38197227 | 1134.44410578 | 1154.94070651 | 1161.47404144 |
|   | 1192.22241771 | 1221.84483627 | 1838.16073089 | 1845.75747033 |
|   | 1856.08569979 | 1857.01704753 | 1863.2723682  | 1876.81166228 |
|   | 1889.08599151 | 1898.04500078 | 3841.32987072 | 3923.71244395 |

```

3945.61996701 3957.518977 3960.87599909 3977.68891098
3979.39869863 4018.77246708 4021.37190034 4033.15970462
4044.54438824 4055.79701509 4078.24666595 4097.07518116
4114.76383795 4123.84100328 4127.41348642 4134.65575768
4137.44980092 4140.35504985 4141.91192966 4145.94313632
4151.9899463 ]
    
```

Ground State Electronic Degeneracy and Irreducible Representation  
 1 ) (A)

Input orientation:

| Center<br>Number | Atomic<br>Number | Atomic<br>Type | Coordinates (Angstroms) |           |           |
|------------------|------------------|----------------|-------------------------|-----------|-----------|
|                  |                  |                | X                       | Y         | Z         |
| 1                | 14               | 0              | -1.354043               | -1.019057 | -0.524329 |
| 2                | 14               | 0              | 0.948281                | 0.988588  | 0.138459  |
| 3                | 8                | 0              | 0.722936                | 2.407163  | -0.901991 |
| 4                | 1                | 0              | 0.177993                | 2.209144  | -1.649738 |
| 5                | 8                | 0              | 2.327566                | 0.536282  | -0.753804 |
| 6                | 1                | 0              | 2.501555                | 1.198219  | -1.409497 |
| 7                | 8                | 0              | 1.197030                | -0.393863 | 1.209660  |
| 8                | 1                | 0              | 1.379920                | -0.088628 | 2.087384  |
| 9                | 8                | 0              | 1.055696                | 1.989159  | 1.480078  |
| 10               | 1                | 0              | 0.951420                | 2.914821  | 1.295364  |
| 11               | 8                | 0              | -0.931875               | -1.862655 | -1.864004 |
| 12               | 1                | 0              | -0.002519               | -2.094062 | -1.957289 |
| 13               | 8                | 0              | -0.516867               | 0.363486  | -0.425453 |
| 14               | 8                | 0              | -2.950338               | -0.687214 | -0.707955 |
| 15               | 1                | 0              | -3.311005               | -0.844152 | -1.577084 |
| 16               | 8                | 0              | -1.180658               | -1.862111 | 0.858029  |
| 17               | 1                | 0              | -0.392799               | -1.582926 | 1.322973  |
| 18               | 1                | 0              | -3.207187               | -2.496401 | 1.772857  |
| 19               | 8                | 0              | -4.130977               | -2.368933 | 1.588391  |
| 20               | 1                | 0              | -4.119570               | -1.783890 | 0.839753  |
| 21               | 1                | 0              | 0.059923                | 4.078975  | -0.203953 |
| 22               | 8                | 0              | -0.257036               | 4.711087  | 0.439481  |
| 23               | 1                | 0              | -1.119305               | 4.398915  | 0.687697  |
| 24               | 1                | 0              | 2.108451                | -1.251405 | -1.689463 |
| 25               | 8                | 0              | 1.867447                | -2.147368 | -1.915018 |
| 26               | 1                | 0              | 2.218345                | -2.658875 | -1.187869 |
| 27               | 1                | 0              | 3.784241                | -2.205335 | 0.704363  |
| 28               | 8                | 0              | 2.951796                | -2.666702 | 0.731105  |
| 29               | 1                | 0              | 2.319884                | -1.987982 | 0.968541  |
| 30               | 8                | 0              | -2.569785               | 2.355835  | 0.586945  |
| 31               | 1                | 0              | -3.354137               | 1.825446  | 0.521049  |
| 32               | 1                | 0              | -1.892968               | 1.828143  | 0.171092  |
| 33               | 8                | 0              | 4.762710                | -0.290139 | 0.518629  |
| 34               | 1                | 0              | 4.828393                | 0.199853  | 1.326730  |
| 35               | 1                | 0              | 3.963667                | 0.021181  | 0.090245  |
| 36               | 8                | 0              | -3.203746               | -1.521318 | -3.520890 |
| 37               | 1                | 0              | -2.366778               | -1.873373 | -3.219442 |
| 38               | 1                | 0              | -2.995058               | -0.881786 | -4.187732 |
| 39               | 8                | 0              | -1.289257               | 2.208050  | 3.401090  |
| 40               | 1                | 0              | -0.435402               | 2.079345  | 3.001381  |
| 41               | 1                | 0              | -1.881739               | 2.289782  | 2.661630  |

**TS4 – H<sub>2</sub>O-loss TS from H<sub>7</sub>Si<sub>2</sub>O<sub>8</sub><sup>-</sup> (No explicit solvation)**

Parameters from the HF/6-31+G(d) level of theory  
 Mass/ a.m.u. Energy a.u. ZPE a.u.  
 190.96795 -1181.232324 0.111649

Rotational constant/  $\text{cm}^{-1}$   
0.0619114974533 0.019811038742 0.0194281071607  
Rotational symmetry number  
1.0

Imaginary Frequency/  $\text{cm}^{-1}$   
-1690.1961

Non-imaginary Vibrational Frequencies/  $\text{cm}^{-1}$   
[ 24.59036059 48.11036631 130.60414525 147.43790821  
176.29578757 182.93337784 219.01962775 249.0729684  
265.94148314 298.98347699 314.39241691 339.22603998  
348.18504925 362.19001719 378.13413455 413.73385952  
425.18804671 478.55983274 506.9242368 625.12894641  
648.60725 716.46357856 728.75875886 814.58175846  
841.61169412 858.0909889 923.89696236 942.73242794  
948.76533721 999.23187431 1025.38606507 1027.40861875  
1048.9199715 1073.65628958 1133.23474379 1285.0305254  
1599.74960906 1992.09027188 3743.54530792 4132.02157265  
4143.15604344 4146.05434202 4147.05519332 4153.72058502]

Ground State Electronic Degeneracy and Irreducible Representation  
1 ) (A)

Input orientation:

| Center<br>Number | Atomic<br>Number | Atomic<br>Type | Coordinates (Angstroms) |           |           |
|------------------|------------------|----------------|-------------------------|-----------|-----------|
|                  |                  |                | X                       | Y         | Z         |
| 1                | 14               | 0              | -1.770135               | -0.017800 | -0.036446 |
| 2                | 14               | 0              | 1.284380                | 0.200716  | 0.077967  |
| 3                | 8                | 0              | 1.118410                | -1.048134 | -0.934891 |
| 4                | 1                | 0              | 2.309509                | -1.167461 | -0.825447 |
| 5                | 8                | 0              | 1.611282                | -0.111941 | 1.684330  |
| 6                | 1                | 0              | 0.860086                | 0.083871  | 2.225515  |
| 7                | 8                | 0              | 1.866240                | 1.660268  | -0.449542 |
| 8                | 1                | 0              | 1.174196                | 2.304446  | -0.460210 |
| 9                | 8                | 0              | 3.255426                | -0.636948 | -0.304685 |
| 10               | 1                | 0              | 3.536465                | -1.098215 | 0.473553  |
| 11               | 8                | 0              | -2.480856               | -0.674105 | 1.299056  |
| 12               | 1                | 0              | -2.472785               | -1.620346 | 1.298715  |
| 13               | 8                | 0              | -0.362546               | 0.691331  | 0.280099  |
| 14               | 8                | 0              | -1.584170               | -1.206906 | -1.135224 |
| 15               | 1                | 0              | -0.643566               | -1.369128 | -1.297442 |
| 16               | 8                | 0              | -2.841402               | 1.131671  | -0.532088 |
| 17               | 1                | 0              | -2.456818               | 1.819521  | -1.055384 |

#### TS4 – H<sub>2</sub>O-loss TS from H<sub>7</sub>Si<sub>2</sub>O<sub>8</sub><sup>-</sup> (Octahydrate)

Parameters from the HF/6-31+G(d) level of theory

Mass/ a.m.u. Energy a.u. ZPE a.u.  
335.05247 -1789.556807 0.334604

Rotational constant/  $\text{cm}^{-1}$   
0.00799252928504 0.00749285027044 0.00494141850627  
Rotational symmetry number  
1.0

Imaginary Frequency/  $\text{cm}^{-1}$   
-194.4714

Non-imaginary Vibrational Frequencies/  $\text{cm}^{-1}$   
[ 18.49489812 24.52780739 27.82227627 34.71007937  
42.90454945 46.41447938 50.9600124 57.54199981  
61.13533402 73.24980505 78.8726433 94.55959747  
98.77151339 104.33874879 115.22995711 122.3888241



|               |               |               |                |
|---------------|---------------|---------------|----------------|
| 128.24102411  | 142.10698493  | 146.74287258  | 151.5594695    |
| 156.22315857  | 161.53323079  | 170.01961583  | 175.69805693   |
| 183.17664031  | 196.68813296  | 205.74444722  | 225.76842372   |
| 240.94105153  | 249.06601804  | 262.40375178  | 275.9360955    |
| 282.2192176   | 282.72659361  | 304.93993234  | 323.98390861   |
| 341.93667893  | 348.0182407   | 356.03895187  | 363.36462741   |
| 363.47583311  | 375.06902742  | 384.02108634  | 402.98860868   |
| 408.54194336  | 413.46974598  | 426.57116761  | 432.08280016   |
| 448.37443533  | 471.43571753  | 477.46167644  | 517.68338836   |
| 528.27573136  | 545.88793423  | 547.75062971  | 563.03446322   |
| 564.41758412  | 604.78525352  | 615.72511434  | 635.42242409   |
| 646.2371785   | 672.56512817  | 705.78783128  | 762.19692302   |
| 769.60600284  | 789.4770715   | 792.71593754  | 816.84062426   |
| 821.89353329  | 862.18474877  | 881.19397325  | 900.46731127   |
| 911.59483171  | 950.54462842  | 982.36335956  | 992.72634081   |
| 1013.68861541 | 1066.43486938 | 1091.40749957 | 1136.37630483  |
| 1150.93035093 | 1153.46028062 | 1165.42879417 | 1189.43532484  |
| 1227.84299375 | 1845.40995251 | 1860.40187105 | 1864.56513448  |
| 1867.74839766 | 1877.99322285 | 1887.94613307 | 1888.25194875  |
| 1909.78415257 | 3435.60282165 | 3774.02957066 | 3904.24449595  |
| 3910.00634133 | 3928.09116842 | 3934.00592163 | 3935.31953897  |
| 3941.95017889 | 3965.60919173 | 3984.61841622 | 4005.02466232  |
| 4051.07772317 | 4057.79176735 | 4064.67957045 | 4084.79390158  |
| 4089.08922177 | 4095.26808853 | 4108.425113   | 4126.04426623  |
| 4133.69660851 | 4137.15788595 | 4147.33320758 | 4151.31576174] |

Ground State Electronic Degeneracy and Irreducible Representation

1 ) (A)

Input orientation:

| Center Number | Atomic Number | Atomic Type | Coordinates (Angstroms) |           |           |
|---------------|---------------|-------------|-------------------------|-----------|-----------|
|               |               |             | X                       | Y         | Z         |
| 1             | 14            | 0           | 0.249831                | 2.015340  | 0.206527  |
| 2             | 14            | 0           | 0.405913                | -1.008368 | -0.459193 |
| 3             | 8             | 0           | -1.240278               | -1.893488 | 1.171739  |
| 4             | 1             | 0           | -1.211300               | -1.643319 | 2.086256  |
| 5             | 8             | 0           | 1.278324                | -1.901702 | 0.624176  |
| 6             | 1             | 0           | 0.609840                | -2.302635 | 1.184366  |
| 7             | 8             | 0           | 1.627979                | -0.519428 | -1.526496 |
| 8             | 1             | 0           | 1.562278                | -0.952952 | -2.366932 |
| 9             | 8             | 0           | -0.558360               | -1.799383 | -1.493293 |
| 10            | 1             | 0           | -1.206773               | -2.428531 | -1.174570 |
| 11            | 8             | 0           | 0.910763                | 2.331567  | 1.655178  |
| 12            | 1             | 0           | 1.649192                | 1.777753  | 1.910716  |
| 13            | 8             | 0           | -0.095739               | 0.429913  | 0.096445  |
| 14            | 8             | 0           | -1.100035               | 2.912947  | 0.056297  |
| 15            | 1             | 0           | -1.708242               | 2.883323  | 0.794316  |
| 16            | 8             | 0           | 1.214200                | 2.407033  | -1.059470 |
| 17            | 1             | 0           | 1.561386                | 1.647075  | -1.515777 |
| 18            | 1             | 0           | 0.348650                | 4.095643  | -2.264041 |
| 19            | 8             | 0           | -0.431668               | 4.625077  | -2.384487 |
| 20            | 1             | 0           | -0.991913               | 4.339283  | -1.671299 |
| 21            | 1             | 0           | -2.111924               | -3.269182 | 0.377757  |
| 22            | 8             | 0           | -2.433228               | -3.727566 | -0.408608 |
| 23            | 1             | 0           | -3.324928               | -3.419238 | -0.537441 |
| 24            | 1             | 0           | 2.416184                | -0.496843 | 1.845477  |
| 25            | 8             | 0           | 2.924764                | 0.292902  | 1.999929  |
| 26            | 1             | 0           | 3.609035                | 0.261010  | 1.333762  |
| 27            | 1             | 0           | 4.518747                | -1.381408 | -0.282349 |
| 28            | 8             | 0           | 4.403229                | -0.447833 | -0.435071 |
| 29            | 1             | 0           | 3.577560                | -0.385883 | -0.908440 |
| 30            | 8             | 0           | -3.150682               | -0.153267 | 0.438775  |
| 31            | 1             | 0           | -2.716175               | 0.359124  | -0.232785 |

|    |   |   |           |           |           |
|----|---|---|-----------|-----------|-----------|
| 32 | 1 | 0 | -2.467843 | -0.801958 | 0.715995  |
| 33 | 8 | 0 | 3.727621  | -3.285918 | 0.091868  |
| 34 | 1 | 0 | 3.561568  | -3.983211 | -0.527093 |
| 35 | 1 | 0 | 2.874139  | -2.904504 | 0.301486  |
| 36 | 8 | 0 | -2.780267 | 2.085054  | 2.234465  |
| 37 | 1 | 0 | -2.142256 | 1.833975  | 2.889646  |
| 38 | 1 | 0 | -3.035594 | 1.279201  | 1.782525  |
| 39 | 8 | 0 | -4.935975 | -2.046502 | -0.800176 |
| 40 | 1 | 0 | -4.919562 | -1.802737 | -1.715380 |
| 41 | 1 | 0 | -4.456343 | -1.356218 | -0.338835 |

### 5 -H<sub>5</sub>Si<sub>2</sub>O<sub>7</sub><sup>-</sup> (No explicit waters)

Parameters from the HF/6-31+G(d) level of theory

Mass/ a.m.u. Energy a.u. ZPE a.u.

172.95738 -1105.251025 0.088143

Rotational constant/ cm<sup>-1</sup>

0.0707863037702 0.0258989170435 0.0250519978058

Rotational symmetry number

1.0

Vibrational Frequencies/ cm<sup>-1</sup>

[ 26.60596392 44.16951429 149.5230151 178.040327 190.446713  
 222.91182728 234.11580164 262.61921283 268.47836319  
 319.48007773 361.30732194 371.07257255 376.6467583  
 397.23371366 422.46350704 465.38195719 513.37416745  
 701.74272392 812.87892117 872.65893571 889.22858513  
 902.72617707 940.73767568 961.36633318 977.69967049  
 999.60024319 1018.77627622 1044.66635345 1084.93671785  
 1184.82723861 1301.23180594 3636.05109737 4130.69405459  
 4139.75731921 4140.54965983 4146.16554772]

Ground State Electronic Degeneracy and Irreducible Representation

1 ) (A)

Input orientation:

| Center<br>Number | Atomic<br>Number | Atomic<br>Type | Coordinates (Angstroms) |           |           |
|------------------|------------------|----------------|-------------------------|-----------|-----------|
|                  |                  |                | X                       | Y         | Z         |
| 1                | 14               | 0              | 1.448567                | 0.023892  | -0.060603 |
| 2                | 14               | 0              | -1.507298               | -0.063587 | -0.066952 |
| 3                | 8                | 0              | -1.422887               | -0.834717 | 1.279669  |
| 4                | 8                | 0              | -2.452633               | -0.795642 | -1.228013 |
| 5                | 1                | 0              | -2.635859               | -1.692246 | -0.986845 |
| 6                | 8                | 0              | -2.073592               | 1.504125  | 0.048416  |
| 7                | 1                | 0              | -2.587985               | 1.618867  | 0.834481  |
| 8                | 8                | 0              | 2.581548                | -0.710105 | -1.001092 |
| 9                | 1                | 0              | 2.664231                | -1.637103 | -0.830314 |
| 10               | 8                | 0              | -0.001964               | 0.140213  | -0.762239 |
| 11               | 8                | 0              | 1.327761                | -0.849187 | 1.307749  |
| 12               | 1                | 0              | 0.397008                | -0.981510 | 1.558803  |
| 13               | 8                | 0              | 2.020799                | 1.550372  | 0.163641  |
| 14               | 1                | 0              | 1.345887                | 2.211385  | 0.093914  |

### 5 -H<sub>5</sub>Si<sub>2</sub>O<sub>7</sub><sup>-</sup> (Nonahydrate)

Parameters from the HF/6-31+G(d) level of theory

Mass/ a.m.u. Energy a.u. ZPE a.u.

335.05247 -1789.591912 0.336998

Rotational constant/  $\text{cm}^{-1}$   
0.009183686669 0.00698783423031 0.00582002633302  
Rotational symmetry number  
1.0

Vibrational Frequencies/  $\text{cm}^{-1}$   
[ 24.36794919 30.33830525 33.6397245 41.80639315  
42.97405301 48.59689126 52.25972903 58.4663972  
60.19008557 79.89434568 85.62838963 91.04966754  
104.38045093 110.44811198 119.08740486 125.19676805  
135.55974929 141.54400607 148.01478778 150.61422104  
164.1396144 171.05521892 174.14117712 178.17238377  
181.72401584 182.93337784 191.85068497 202.76274437  
211.2352287 214.87026504 221.63991208 225.17069308  
247.06431543 254.29963634 261.56970903 279.36262116  
292.17907818 305.30135087 348.03214141 353.68973144  
362.21086826 382.7700222 389.57442102 397.37272079  
404.4481835 430.83173602 441.37542653 458.16748735  
476.55117977 487.28948025 496.06778026 501.22494464  
518.71899145 520.64424014 545.61687033 550.04424729  
557.0571568 594.22071194 607.42638891 611.13787918  
676.81179587 680.88470466 692.17903365 717.49918165  
736.25819331 756.25436838 817.80672378 838.0044592  
848.65240505 858.27864852 867.89099129 880.90900864  
902.69142529 914.9518538 940.83498067 954.74264362  
978.4920111 986.429318 1002.79740709 1079.61969528  
1113.94750505 1139.62212123 1182.84638706 1210.88412438  
1248.61065838 1850.81037936 1858.8032891 1864.32187201  
1869.93080954 1878.25733639 1883.21294043 1888.40485659  
1895.51507108 1920.52245305 3719.76118866 3750.93353667  
3809.96986309 3851.06036954 3879.00775222 3936.86946843  
3949.09514516 3950.42266322 3975.20763379 3980.65671313  
3983.31174923 4025.87573122 4036.23871246 4049.33318373  
4056.00552578 4078.44822628 4089.07532106 4095.74071275  
4118.69773962 4137.31079379 4142.8919299 4145.56781708  
4147.70157646]

Ground State Electronic Degeneracy and Irreducible Representation  
1 ) (A)

Input orientation:

| Center<br>Number | Atomic<br>Number | Atomic<br>Type | Coordinates (Angstroms) |           |           |
|------------------|------------------|----------------|-------------------------|-----------|-----------|
|                  |                  |                | X                       | Y         | Z         |
| 1                | 14               | 0              | -1.626345               | -0.728237 | -0.844878 |
| 2                | 14               | 0              | 0.656149                | 0.479176  | 0.823532  |
| 3                | 8                | 0              | 2.465297                | 1.942622  | -2.147341 |
| 4                | 1                | 0              | 2.753760                | 1.332842  | -2.812540 |
| 5                | 8                | 0              | 2.044995                | 0.391003  | 0.115828  |
| 6                | 1                | 0              | 2.389174                | 1.423204  | -1.334752 |
| 7                | 8                | 0              | 0.366041                | -0.739507 | 1.920820  |
| 8                | 1                | 0              | -0.214462               | -0.476546 | 2.634591  |
| 9                | 8                | 0              | 0.395588                | 1.889985  | 1.664078  |
| 10               | 1                | 0              | 1.023064                | 2.574571  | 1.479341  |
| 11               | 8                | 0              | -0.957127               | -1.454980 | -2.149301 |
| 12               | 1                | 0              | -0.041836               | -1.733604 | -2.033912 |
| 13               | 8                | 0              | -0.607726               | 0.383286  | -0.245974 |
| 14               | 8                | 0              | -3.043576               | -0.067797 | -1.275073 |
| 15               | 1                | 0              | -3.051152               | 0.516872  | -2.038079 |
| 16               | 8                | 0              | -1.984819               | -1.801761 | 0.347110  |
| 17               | 1                | 0              | -1.293837               | -1.890171 | 0.996169  |
| 18               | 1                | 0              | -3.565743               | -0.880042 | 1.417969  |
| 19               | 8                | 0              | -3.978405               | -0.070014 | 1.704615  |
| 20               | 1                | 0              | -4.095820               | 0.412012  | 0.893587  |

|    |   |   |           |           |           |
|----|---|---|-----------|-----------|-----------|
| 21 | 1 | 0 | 0.571561  | 2.601117  | -2.367287 |
| 22 | 8 | 0 | -0.360966 | 2.726451  | -2.195803 |
| 23 | 1 | 0 | -0.537539 | 2.162348  | -1.449848 |
| 24 | 1 | 0 | 1.948352  | -1.139395 | -1.026579 |
| 25 | 8 | 0 | 1.704727  | -1.979441 | -1.425822 |
| 26 | 1 | 0 | 1.878834  | -2.616244 | -0.736695 |
| 27 | 1 | 0 | 3.112701  | -2.468957 | 1.354365  |
| 28 | 8 | 0 | 2.309735  | -2.985347 | 1.328107  |
| 29 | 1 | 0 | 1.646161  | -2.403451 | 1.687568  |
| 30 | 8 | 0 | -1.674361 | 0.699952  | 3.413492  |
| 31 | 1 | 0 | -2.492035 | 0.569817  | 2.935958  |
| 32 | 1 | 0 | -1.254655 | 1.462952  | 3.029293  |
| 33 | 8 | 0 | 4.272648  | -0.798243 | 1.215108  |
| 34 | 1 | 0 | 4.475645  | -0.325194 | 2.009645  |
| 35 | 1 | 0 | 3.546298  | -0.313854 | 0.796569  |
| 36 | 8 | 0 | -2.659741 | 1.575947  | -3.549171 |
| 37 | 1 | 0 | -2.356827 | 0.918160  | -4.170656 |
| 38 | 1 | 0 | -1.891718 | 2.089358  | -3.299766 |
| 39 | 8 | 0 | -1.822877 | -0.931563 | -4.827538 |
| 40 | 1 | 0 | -1.448817 | -1.180382 | -3.980980 |
| 41 | 1 | 0 | -2.576210 | -1.492921 | -4.949163 |

## 2H<sub>4</sub>SiO<sub>4</sub> Hydrogen-bonded Dimer (No explicit waters)

Parameters from the HF/6-31+G(d) level of theory

Mass/ a.m.u. Energy a.u. ZPE a.u.  
 191.97577 -1181.831466 0.126335

Rotational constant/ cm<sup>-1</sup>

0.0683863101052 0.0132625084251 0.0131017305312

Rotational symmetry number

1.0

Vibrational Frequencies/ cm<sup>-1</sup>

[ 23.4435518 40.79164113 43.66908864 92.09917134  
 110.87208371 142.85762341 204.04160992 213.29253416  
 235.10275223 236.40941922 300.02603044 300.81837106  
 317.97185041 319.27156704 374.20718324 380.66406424  
 385.57796615 385.81427826 397.00435191 409.04236902  
 437.20521275 440.90975266 640.87150343 731.47634817  
 813.00402758 813.17083613 890.00702504 894.97652979  
 908.10575285 908.14745498 963.09002154 974.39130089  
 982.69697667 985.92194199 1003.0337192 1006.3907413  
 1063.49486866 1091.1155846 1091.59515919 1122.03076943  
 3974.79756276 3993.28551052 4123.97306005 4124.34837929  
 4138.67306363 4138.95107788 4142.85717812 4143.37845484]

Ground State Electronic Degeneracy and Irreducible Representation

1 ) (A)

Input orientation:

| Center<br>Number | Atomic<br>Number | Atomic<br>Type | Coordinates (Angstroms) |           |           |
|------------------|------------------|----------------|-------------------------|-----------|-----------|
|                  |                  |                | X                       | Y         | Z         |
| 1                | 14               | 0              | 1.364228                | 1.207015  | -1.412520 |
| 2                | 8                | 0              | 1.401274                | 1.161699  | 0.233742  |
| 3                | 1                | 0              | 2.258361                | 1.122012  | 0.637730  |
| 4                | 8                | 0              | 2.660262                | 0.335098  | -1.877855 |
| 5                | 1                | 0              | 3.039407                | 0.510071  | -2.727633 |
| 6                | 8                | 0              | -0.086011               | 0.669287  | -1.875197 |
| 7                | 1                | 0              | -0.507034               | -0.047472 | -1.404403 |
| 8                | 8                | 0              | -0.860606               | 0.289395  | 1.774056  |

|    |    |   |           |           |           |
|----|----|---|-----------|-----------|-----------|
| 9  | 8  | 0 | 1.548804  | 2.698496  | -2.042510 |
| 10 | 1  | 0 | -0.090920 | 0.653042  | 1.340486  |
| 11 | 14 | 0 | -1.373141 | -1.197988 | 1.411568  |
| 12 | 8  | 0 | -0.578552 | -2.443337 | 2.100201  |
| 13 | 1  | 0 | -0.848532 | -2.728845 | 2.961645  |
| 14 | 8  | 0 | -1.156123 | -1.410009 | -0.207553 |
| 15 | 1  | 0 | -1.089912 | -2.305419 | -0.512897 |
| 16 | 8  | 0 | -2.925565 | -1.304158 | 1.895488  |
| 17 | 1  | 0 | -3.432713 | -0.505426 | 1.937630  |
| 18 | 1  | 0 | 0.768260  | 3.203880  | -2.222196 |

-----

## 2H<sub>4</sub>SiO<sub>4</sub> Hydrogen-bonded Dimer (Dihydrate)

Parameters from the HF/6-31+G(d) level of theory

Mass/ a.m.u.    Energy a.u.    ZPE a.u.  
 227.9969        -1333.893707    0.180038

Rotational constant/ cm<sup>-1</sup>

0.0243091505658    0.0138265653101    0.0101593616475

Rotational symmetry number

1.0

Vibrational Frequencies/ cm<sup>-1</sup>

[ 24.08993494    38.74823638    58.19533331    63.32469626  
 73.05519508    87.17831908    98.9452723    111.21265117  
 132.41123789    146.79152507    158.1275562    166.04401203  
 170.978765    176.55990111    188.9037339    206.95380921  
 219.80501801    249.2953798    280.94035204    302.54205942  
 321.39142571    333.63795351    346.4266091    355.44122123  
 389.01839252    395.53087637    403.82265144    414.39414337  
 424.16634433    438.48407831    548.24410501    577.25489221  
 621.59816541    675.05335572    783.20089976    810.41154468  
 814.94317699    828.05154897    878.14276683    888.12347848  
 893.25284143    942.32235691    976.10108854    977.85952868  
 989.47357406    1018.99173727    1034.33117363    1056.33600167  
 1077.01331167    1112.25856847    1127.27828844    1235.26597428  
 1813.20200141    1827.48498361    3913.88464014    3958.29046655  
 3977.31359174    3990.28990696    3998.36622098    4027.02254001  
 4121.23461967    4141.36980187    4146.24895199    4149.68937836  
 4157.63363561    4163.52753776]

Ground State Electronic Degeneracy and Irreducible Representation

1 ) (A)

Input orientation:

| Center<br>Number | Atomic<br>Number | Atomic<br>Type | Coordinates (Angstroms) |           |           |
|------------------|------------------|----------------|-------------------------|-----------|-----------|
|                  |                  |                | X                       | Y         | Z         |
| 1                | 14               | 0              | 0.336450                | -1.887146 | -1.079319 |
| 2                | 8                | 0              | 0.451343                | -1.833519 | 0.548585  |
| 3                | 1                | 0              | 1.306095                | -1.929199 | 0.966518  |
| 4                | 8                | 0              | -1.280939               | -2.000859 | -1.372123 |
| 5                | 1                | 0              | -1.767848               | -2.628027 | -0.853683 |
| 6                | 8                | 0              | 0.888013                | -0.577521 | -1.849719 |
| 7                | 1                | 0              | 0.560392                | 0.275276  | -1.568343 |
| 8                | 8                | 0              | 0.404940                | 0.778822  | 1.794068  |
| 9                | 8                | 0              | 1.168640                | -3.172634 | -1.629240 |
| 10               | 1                | 0              | 0.184118                | -0.092400 | 1.468503  |
| 11               | 14               | 0              | -0.319194               | 2.022747  | 1.012667  |
| 12               | 8                | 0              | -1.796491               | 2.397471  | 1.577430  |

|    |   |   |           |           |           |
|----|---|---|-----------|-----------|-----------|
| 13 | 1 | 0 | -1.873447 | 3.005297  | 2.298683  |
| 14 | 8 | 0 | -0.489210 | 1.576401  | -0.546234 |
| 15 | 1 | 0 | -1.359502 | 1.490433  | -0.939273 |
| 16 | 8 | 0 | 0.633599  | 3.327047  | 1.222400  |
| 17 | 1 | 0 | 1.573586  | 3.217929  | 1.212450  |
| 18 | 1 | 0 | 1.629676  | -3.087386 | -2.451993 |
| 19 | 1 | 0 | -2.900541 | 0.675765  | -2.828940 |
| 20 | 8 | 0 | -2.681030 | 0.506434  | -1.922905 |
| 21 | 1 | 0 | -2.335874 | -0.383177 | -1.878697 |
| 22 | 1 | 0 | 2.194693  | -0.274063 | 2.353629  |
| 23 | 8 | 0 | 2.648639  | -1.096628 | 2.193337  |
| 24 | 1 | 0 | 2.967029  | -1.408974 | 3.029493  |

-----

### 2H<sub>4</sub>SiO<sub>4</sub> Hydrogen-bonded Dimer (Tetrahydrate)

Parameters from the HF/6-31+G(d) level of theory

Mass/ a.m.u.    Energy a.u.    ZPE a.u.  
 264.01803       -1485.956124    0.235128

Rotational constant/ cm<sup>-1</sup>

0.0236983947074    0.0076132669088    0.00681037813166

Rotational symmetry number

1.0

Vibrational Frequencies/ cm<sup>-1</sup>

[    16.14567769    20.92752282    25.54950976    46.8245504  
    50.32752997    58.84171644    83.75874378    91.64044783  
    97.7359103    100.58555639    116.56442552    139.09053029  
   150.3501075    154.77748446    162.10316001    176.01082296  
   181.2861434    184.74047048    189.25125172    193.24075623  
   198.85664412    229.88998501    268.58956889    286.36858031  
   287.77950264    293.51354659    310.78518199    316.44972238  
   336.25128748    351.38221315    370.25938086    383.5971146  
   397.85229537    410.64790132    412.80251178    419.70421558  
   426.47386262    441.38237689    521.57558789    544.67857223  
   588.07659697    617.86582408    623.96128655    665.94143861  
   670.57037591    680.15491725    760.2925254    808.15267888  
   814.28289314    831.90899672    937.79767496    947.52122343  
   955.45853032    961.38718425    982.49541633    1007.12747906  
 1038.73074916    1056.01628528    1077.05501381    1091.14338603  
 1120.1263718    1141.19290175    1158.40198395    1167.94482315  
 1798.76611138    1817.31661234    1819.68668384    1827.73519644  
 3900.25499144    3968.66039815    3970.25202974    3985.02153688  
 3988.06579294    4002.00820768    4026.97388751    4028.53076733  
 4035.84254215    4048.14467281    4075.59858019    4126.96171326  
 4153.22710972    4156.34086934    4162.90895605    4164.7299494 ]

Ground State Electronic Degeneracy and Irreducible Representation

1 ) (A)

Input orientation:

| Center<br>Number | Atomic<br>Number | Atomic<br>Type | Coordinates (Angstroms) |           |           |
|------------------|------------------|----------------|-------------------------|-----------|-----------|
|                  |                  |                | X                       | Y         | Z         |
| 1                | 14               | 0              | -2.096092               | 0.061263  | 0.706468  |
| 2                | 8                | 0              | -1.477324               | 1.018523  | -0.464271 |
| 3                | 1                | 0              | -1.088408               | 1.855713  | -0.226554 |
| 4                | 8                | 0              | -2.586022               | -1.304541 | -0.045748 |
| 5                | 1                | 0              | -3.436600               | -1.242062 | -0.478124 |
| 6                | 8                | 0              | -1.039575               | -0.268612 | 1.885073  |
| 7                | 1                | 0              | -0.185592               | -0.610996 | 1.623126  |

|    |    |   |           |           |           |
|----|----|---|-----------|-----------|-----------|
| 8  | 8  | 0 | 1.176202  | 0.589129  | -1.697157 |
| 9  | 8  | 0 | -3.376981 | 0.815176  | 1.410239  |
| 10 | 1  | 0 | 0.238511  | 0.434034  | -1.629449 |
| 11 | 14 | 0 | 2.098243  | -0.127243 | -0.545809 |
| 12 | 8  | 0 | 3.379043  | -0.832882 | -1.225199 |
| 13 | 1  | 0 | 4.224422  | -0.733238 | -0.794193 |
| 14 | 8  | 0 | 1.166517  | -1.161434 | 0.313342  |
| 15 | 1  | 0 | 0.821260  | -1.956158 | -0.097828 |
| 16 | 8  | 0 | 2.632539  | 1.017677  | 0.506478  |
| 17 | 1  | 0 | 2.080307  | 1.782058  | 0.630658  |
| 18 | 1  | 0 | -3.409075 | 0.798179  | 2.357603  |
| 19 | 1  | 0 | -0.587231 | -4.054665 | -0.469642 |
| 20 | 8  | 0 | -0.485919 | -3.154821 | -0.748269 |
| 21 | 1  | 0 | -1.307887 | -2.703670 | -0.560572 |
| 22 | 1  | 0 | 0.901031  | 2.602673  | -1.191842 |
| 23 | 8  | 0 | 0.594306  | 3.074624  | -0.420304 |
| 24 | 1  | 0 | 0.665775  | 4.002242  | -0.603421 |
| 25 | 1  | 0 | 4.641595  | 0.658141  | 0.927334  |
| 26 | 8  | 0 | 5.365838  | 0.096573  | 0.664818  |
| 27 | 1  | 0 | 5.672257  | -0.345602 | 1.444760  |
| 28 | 1  | 0 | -5.035083 | 0.367846  | 0.033147  |
| 29 | 8  | 0 | -5.154041 | -0.223791 | -0.703605 |
| 30 | 1  | 0 | -5.397564 | 0.307077  | -1.450119 |

-----

### 2H<sub>4</sub>SiO<sub>4</sub> Hydrogen-bonded Dimer (Hexahydrate)

Parameters from the HF/6-31+G(d) level of theory

Mass/ a.m.u.    Energy a.u.    ZPE a.u.  
 300.03916       -1638.027312    0.290222

Rotational constant/ cm<sup>-1</sup>

0.0140774055096    0.00565958200323    0.00510286352834

Rotational symmetry number

1.0

Vibrational Frequencies/ cm<sup>-1</sup>

[ 15.65220239    20.85801926    25.8622758    27.89873019  
 31.37390834    43.62043614    51.37008342    59.75916347  
 62.79646918    68.51661241    75.63377727    90.38938369  
 103.60896138    111.17094903    123.87620035    127.39308064  
 139.94542412    155.29181083    165.61308994    166.70429588  
 179.13153294    187.17309518    194.0886997    202.27621942  
 211.22132798    218.08132965    222.95352942    239.49537742  
 244.10346364    276.17935797    287.70999907    294.38234112  
 305.80177653    323.65724186    343.50745946    354.93384522  
 363.14221601    378.40519844    383.22179536    395.92009632  
 399.73584193    402.14066521    415.77726427    425.64677022  
 427.16889825    449.02081846    457.70181348    538.52055655  
 561.98495942    574.87787036    597.13986159    617.27504379  
 657.14923789    688.18952913    715.86584792    754.05110544  
 755.99025484    810.55750216    814.70686487    832.70133734  
 855.31084638    876.11326279    895.62291293    944.01824385  
 951.628884       975.01683295    985.7620838    1001.6505983  
 1036.29812446    1047.85656699    1138.4336103    1153.45333027  
 1173.06723575    1194.25192175    1208.79206713    1279.2408786  
 1814.64767552    1831.05746675    1835.03307055    1843.49165417  
 1850.03888981    1856.90584183    3836.04759993    3856.19668285  
 3894.54874891    3924.76889811    3938.66266036    3946.73897438  
 3954.80138769    3974.96437131    3984.84082762    3989.57402026  
 4012.29473501    4017.77856613    4116.11915743    4118.00965434  
 4145.67207242    4145.77632776    4149.89788905    4153.25491114  
 4155.39562089    4160.85165058]

Ground State Electronic Degeneracy and Irreducible Representation

1 ) (A)

Input orientation:

| Center Number | Atomic Number | Atomic Type | Coordinates (Angstroms) |           |           |
|---------------|---------------|-------------|-------------------------|-----------|-----------|
|               |               |             | X                       | Y         | Z         |
| 1             | 14            | 0           | 1.850339                | 0.220353  | -0.152132 |
| 2             | 8             | 0           | 0.901984                | 0.642330  | 1.132374  |
| 3             | 1             | 0           | 1.157111                | 1.430892  | 1.593731  |
| 4             | 8             | 0           | 1.761936                | -1.390653 | -0.300225 |
| 5             | 1             | 0           | 2.089349                | -1.926620 | 0.427730  |
| 6             | 8             | 0           | 1.347577                | 0.926268  | -1.529354 |
| 7             | 1             | 0           | 0.439757                | 0.756126  | -1.784528 |
| 8             | 8             | 0           | -1.976639               | 0.520658  | 0.703714  |
| 9             | 8             | 0           | 3.355544                | 0.779914  | 0.155732  |
| 10            | 1             | 0           | -1.045954               | 0.542302  | 0.920739  |
| 11            | 14            | 0           | -2.418315               | -0.338590 | -0.627187 |
| 12            | 8             | 0           | -2.527123               | -1.936223 | -0.374443 |
| 13            | 1             | 0           | -3.215570               | -2.245192 | 0.218179  |
| 14            | 8             | 0           | -1.265723               | -0.142060 | -1.770887 |
| 15            | 1             | 0           | -0.957664               | -0.964181 | -2.165390 |
| 16            | 8             | 0           | -3.879597               | 0.244661  | -1.047979 |
| 17            | 1             | 0           | -4.061691               | 1.160745  | -0.895076 |
| 18            | 1             | 0           | 3.778909                | 1.257808  | -0.559286 |
| 19            | 1             | 0           | -0.820164               | -3.063529 | -1.617237 |
| 20            | 8             | 0           | -0.170115               | -2.666530 | -2.187177 |
| 21            | 1             | 0           | 0.582586                | -2.474896 | -1.633491 |
| 22            | 1             | 0           | -5.455348               | -2.253894 | 1.139164  |
| 23            | 8             | 0           | -4.593046               | -2.365819 | 1.516956  |
| 24            | 1             | 0           | -4.460603               | -1.626503 | 2.109780  |
| 25            | 1             | 0           | 4.468243                | 0.008916  | 1.595800  |
| 26            | 8             | 0           | 4.789412                | -0.552074 | 2.299981  |
| 27            | 1             | 0           | 5.732965                | -0.589484 | 2.220670  |
| 28            | 8             | 0           | 3.840630                | 2.145783  | -2.274451 |
| 29            | 1             | 0           | 2.930165                | 1.942013  | -2.472796 |
| 30            | 1             | 0           | 4.348212                | 1.955430  | -3.051812 |
| 31            | 8             | 0           | -3.856146               | 0.054562  | 2.873608  |
| 32            | 1             | 0           | -3.177985               | 0.346303  | 2.265985  |
| 33            | 1             | 0           | -3.520110               | 0.175997  | 3.751001  |
| 34            | 8             | 0           | 2.910121                | -2.656016 | 1.926738  |
| 35            | 1             | 0           | 3.627581                | -2.078040 | 2.187839  |
| 36            | 1             | 0           | 2.408556                | -2.846241 | 2.707953  |

### 2H<sub>4</sub>SiO<sub>4</sub> Hydrogen-bonded Dimer (Octahydrate)

Parameters from the HF/6-31+G(d) level of theory

Mass/ a.m.u.    Energy a.u.    ZPE a.u.  
 336.06029       -1790.098466    0.346008

Rotational constant/ cm<sup>-1</sup>

0.0103308135924    0.00564257023437    0.00453813951517

Rotational symmetry number

1.0

Vibrational Frequencies/ cm<sup>-1</sup>

|   |              |              |              |              |
|---|--------------|--------------|--------------|--------------|
| [ | 18.04312496  | 23.9370271   | 29.6780214   | 35.16880288  |
|   | 36.64922877  | 45.59433733  | 49.65334541  | 57.56285088  |
|   | 62.81732025  | 72.64512406  | 75.35576301  | 80.0820053   |
|   | 86.67789343  | 104.29009629 | 111.40726115 | 116.9814469  |
|   | 125.86400225 | 135.02457186 | 141.5857082  | 146.24939728 |
|   | 151.37180988 | 159.35081891 | 162.30472034 | 162.49237996 |
|   | 178.06812843 | 186.12359138 | 189.38330849 | 190.83593295 |



```

197.81409068 201.9773541 207.63494413 215.23863393
217.33764153 242.08090996 252.29793372 295.5152492
298.62205847 300.76276821 314.67043117 327.7232003
338.82986967 342.19384212 358.01980341 364.16391838
389.15739964 393.93924478 416.27768993 419.16208779
424.22889754 427.98208994 433.77868709 444.13471798
494.20508477 507.87643562 519.00395605 538.05488268
558.07885918 574.98907606 581.932482 592.44142073
609.85206326 629.36866376 656.79476972 659.84597614
681.3225771 708.75563342 719.25067144 773.1437342
801.67494681 813.83111998 820.75367486 827.59282546
851.09198011 934.72561748 940.03568969 962.05441845
976.60151419 987.96534674 1004.15272657 1006.91896838
1031.3286197 1129.2243882 1148.42822266 1170.55815712
1179.1348968 1192.61858802 1255.44980898 1296.49166294
1768.98383463 1813.62597315 1821.21576223 1824.80214608
1836.23548219 1841.16328481 1876.65875444 1882.52485516
3819.47100015 3831.4395137 3849.6980997 3880.42562491
3901.91612659 3951.38181239 3958.04720408 3961.86990004
3970.31458295 3977.03557749 3987.45416159 3991.14480078
4009.12537253 4014.30338798 4031.85303764 4085.23177403
4089.561846 4108.74482939 4129.75575649 4136.0527793
4152.57377623 4158.13406127 4160.11491281 4164.91760902]
    
```

Ground State Electronic Degeneracy and Irreducible Representation

1 ) (A)

Input orientation:

| Center<br>Number | Atomic<br>Number | Atomic<br>Type | Coordinates (Angstroms) |           |           |
|------------------|------------------|----------------|-------------------------|-----------|-----------|
|                  |                  |                | X                       | Y         | Z         |
| 1                | 14               | 0              | -2.624479               | -0.174126 | 0.198460  |
| 2                | 8                | 0              | -1.889600               | -0.322216 | 1.644019  |
| 3                | 1                | 0              | -1.311885               | -1.066393 | 1.809874  |
| 4                | 8                | 0              | -2.878629               | 1.413635  | -0.042142 |
| 5                | 1                | 0              | -3.762919               | 1.672473  | -0.300337 |
| 6                | 8                | 0              | -1.714525               | -0.877229 | -0.962547 |
| 7                | 1                | 0              | -0.815269               | -0.549630 | -1.048672 |
| 8                | 8                | 0              | 1.947147                | -0.169374 | 1.469441  |
| 9                | 8                | 0              | -4.099603               | -0.898425 | 0.139957  |
| 10               | 1                | 0              | 1.475469                | 0.531379  | 1.931869  |
| 11               | 14               | 0              | 2.187874                | 0.043229  | -0.138893 |
| 12               | 8                | 0              | 3.220778                | 1.272101  | -0.448718 |
| 13               | 1                | 0              | 4.148358                | 1.040764  | -0.478681 |
| 14               | 8                | 0              | 0.762843                | 0.417132  | -0.854506 |
| 15               | 1                | 0              | 0.417573                | 1.296290  | -0.679523 |
| 16               | 8                | 0              | 2.801613                | -1.327898 | -0.746097 |
| 17               | 1                | 0              | 2.288012                | -2.138534 | -0.670401 |
| 18               | 1                | 0              | -4.138101               | -1.844114 | 0.092579  |
| 19               | 1                | 0              | 0.192601                | 3.532514  | -0.609887 |
| 20               | 8                | 0              | -0.280911               | 2.896209  | -0.077037 |
| 21               | 1                | 0              | -1.205443               | 2.899185  | -0.303996 |
| 22               | 1                | 0              | 0.902581                | -1.618885 | 2.086707  |
| 23               | 8                | 0              | 0.188907                | -2.246829 | 2.225343  |
| 24               | 1                | 0              | 0.272268                | -2.571844 | 3.112584  |
| 25               | 1                | 0              | 4.876861                | -1.028319 | -0.953907 |
| 26               | 8                | 0              | 5.535919                | -0.353634 | -0.809460 |
| 27               | 1                | 0              | 6.177236                | -0.715815 | -0.213318 |
| 28               | 1                | 0              | -5.630475               | 0.508982  | -0.368299 |
| 29               | 8                | 0              | -5.669912               | 1.430062  | -0.608544 |
| 30               | 1                | 0              | -6.360523               | 1.825855  | -0.094200 |
| 31               | 8                | 0              | 1.090525                | -3.503771 | -0.308018 |
| 32               | 1                | 0              | 0.360533                | -3.666839 | -0.902540 |
| 33               | 1                | 0              | 0.706607                | -3.387082 | 0.555543  |

|    |   |   |           |           |           |
|----|---|---|-----------|-----------|-----------|
| 34 | 8 | 0 | -1.372016 | -3.571284 | -1.863181 |
| 35 | 1 | 0 | -1.600348 | -2.656689 | -1.706083 |
| 36 | 1 | 0 | -1.446455 | -3.722622 | -2.795696 |
| 37 | 8 | 0 | 0.139002  | 1.687830  | 2.553279  |
| 38 | 1 | 0 | 0.056047  | 2.375506  | 1.898545  |
| 39 | 1 | 0 | -0.658201 | 1.172305  | 2.463921  |
| 40 | 8 | 0 | 2.055270  | 3.838278  | -1.340396 |
| 41 | 1 | 0 | 2.456419  | 4.174481  | -2.129945 |
| 42 | 1 | 0 | 2.559541  | 3.068620  | -1.079984 |

## 2H<sub>4</sub>SiO<sub>4</sub> Hydrogen-bonded Dimer (Decahydrate)

Parameters from the HF/6-31+G(d) level of theory

Mass/ a.m.u.    Energy a.u.    ZPE a.u.  
 372.08142       -1942.164814    0.401496

Rotational constant/ cm<sup>-1</sup>

0.00722633255837    0.00563222974742    0.00425094082921

Rotational symmetry number

1.0

Vibrational Frequencies/ cm<sup>-1</sup>

[    21.01787745    27.72497128    34.32085941    42.76554232  
    45.01745776    48.26327415    53.83745991    58.34824115  
    59.5645535    60.9963269    67.84937821    71.58171954  
    76.59987679    83.59888559    90.17392265    92.00881671  
 109.37080675    115.23690747    116.78683692    125.79449869  
 129.48513789    138.24258682    144.5604607    148.52216379  
 149.83578113    154.02684598    160.07365597    162.79819564  
 166.94755835    174.39138994    184.14273984    187.25649946  
 193.92189115    207.80870304    209.69919995    221.22984106  
 221.84842277    227.7909774    251.54034488    253.3196361  
 261.77821972    279.86999717    294.17383043    302.63241405  
 312.18220361    322.83014946    349.60987229    351.34746136  
 355.03810056    363.01015924    370.00916803    389.15739964  
 400.83399823    413.37244099    416.4097467    424.97953602  
 438.37287261    444.94790967    459.14053724    463.37330422  
 471.93614318    507.27870497    512.69998289    549.3909138  
 565.05006655    574.34269292    588.16000125    589.23035612  
 601.66454354    619.12383857    629.81348656    653.70186117  
 660.01278469    663.62696996    673.51732698    711.44542131  
 716.1230111    724.53294223    741.85323013    789.17820618  
 798.71409503    816.57651072    822.0672922    879.706597  
 926.73270773    941.66902342    954.74264362    960.57399256  
 977.70662084    984.87938855    1012.92407622    1021.22280164  
 1044.02692067    1091.77586845    1129.34254426    1144.36226422  
 1172.90737755    1190.14426118    1245.12157952    1327.71266344  
 1814.60597339    1818.65108075    1821.18101045    1825.08711069  
 1835.92271616    1837.92441878    1858.73378554    1870.21577415  
 1888.48131051    1895.29265968    3747.59041529    3763.18006447  
 3794.2690082    3899.1637855    3913.59272518    3931.94861617  
 3959.98635349    3966.82550409    3969.45273877    3972.99742048  
 3986.46721099    3989.17089959    3999.35317157    4003.28707324  
 4012.44764285    4016.61090627    4021.26764499    4043.37672838  
 4082.59063863    4085.9198593    4113.31816384    4119.78894556  
 4131.72270732    4136.28909141    4147.70157646    4149.82838549  
 4160.49718241    4164.7299494 ]

Ground State Electronic Degeneracy and Irreducible Representation

1 ) (A)

Input orientation:

-----  
 Center            Atomic            Atomic            Coordinates (Angstroms)

| Number | Number | Type | X         | Y         | Z         |
|--------|--------|------|-----------|-----------|-----------|
| 1      | 14     | 0    | 2.652390  | 0.993254  | 0.404538  |
| 2      | 8      | 0    | 2.469685  | 1.874128  | 1.741571  |
| 3      | 1      | 0    | 1.602987  | 2.083997  | 2.087338  |
| 4      | 8      | 0    | 2.608587  | -0.606320 | 0.745595  |
| 5      | 1      | 0    | 3.065392  | -1.175230 | 0.132488  |
| 6      | 8      | 0    | 1.525339  | 1.328507  | -0.732594 |
| 7      | 1      | 0    | 0.785655  | 0.728084  | -0.829815 |
| 8      | 8      | 0    | -1.526942 | 0.051554  | 1.598008  |
| 9      | 8      | 0    | 4.120857  | 1.356655  | -0.237477 |
| 10     | 1      | 0    | -0.976456 | -0.681202 | 1.899464  |
| 11     | 14     | 0    | -2.031906 | -0.024930 | 0.043103  |
| 12     | 8      | 0    | -3.154587 | -1.175283 | -0.227374 |
| 13     | 1      | 0    | -4.066299 | -0.914695 | -0.102341 |
| 14     | 8      | 0    | -0.734562 | -0.414826 | -0.901939 |
| 15     | 1      | 0    | -0.379224 | -1.302229 | -0.761141 |
| 16     | 8      | 0    | -2.649117 | 1.403177  | -0.393462 |
| 17     | 1      | 0    | -2.225324 | 2.235627  | -0.150266 |
| 18     | 1      | 0    | 4.595636  | 2.073792  | 0.161195  |
| 19     | 1      | 0    | -0.661281 | -3.460790 | -1.047800 |
| 20     | 8      | 0    | 0.105996  | -3.071529 | -0.625051 |
| 21     | 1      | 0    | 0.807094  | -3.096359 | -1.277786 |
| 22     | 1      | 0    | -0.736785 | 1.563838  | 2.436007  |
| 23     | 8      | 0    | -0.212977 | 2.327470  | 2.688666  |
| 24     | 1      | 0    | -0.341606 | 2.458777  | 3.619246  |
| 25     | 1      | 0    | -4.773751 | 1.213687  | -0.339536 |
| 26     | 8      | 0    | -5.425536 | 0.535227  | -0.184564 |
| 27     | 1      | 0    | -6.073997 | 0.894324  | 0.405487  |
| 28     | 1      | 0    | 4.589295  | -0.282073 | -1.470857 |
| 29     | 8      | 0    | 4.271624  | -1.163740 | -1.652589 |
| 30     | 1      | 0    | 5.032347  | -1.715348 | -1.782911 |
| 31     | 8      | 0    | -1.391356 | 3.734205  | 0.362548  |
| 32     | 1      | 0    | -0.722204 | 4.011816  | -0.261079 |
| 33     | 1      | 0    | -0.946476 | 3.588589  | 1.191792  |
| 34     | 8      | 0    | 0.830772  | 4.026260  | -1.435701 |
| 35     | 1      | 0    | 1.152613  | 3.130627  | -1.348499 |
| 36     | 1      | 0    | 0.955948  | 4.289836  | -2.336707 |
| 37     | 8      | 0    | 0.332917  | -1.977098 | 2.076677  |
| 38     | 1      | 0    | 0.227442  | -2.636573 | 1.395430  |
| 39     | 1      | 0    | 1.169868  | -1.564692 | 1.879971  |
| 40     | 8      | 0    | -2.317375 | -3.366713 | -2.083813 |
| 41     | 1      | 0    | -2.042514 | -2.883434 | -2.855407 |
| 42     | 1      | 0    | -2.809988 | -2.750307 | -1.548286 |
| 43     | 8      | 0    | 1.864276  | -2.515502 | -2.791882 |
| 44     | 1      | 0    | 2.595848  | -1.929900 | -2.625435 |
| 45     | 1      | 0    | 1.235169  | -2.051076 | -3.336347 |
| 46     | 8      | 0    | -0.677208 | -1.174560 | -3.691391 |
| 47     | 1      | 0    | -0.791501 | -0.687415 | -2.877564 |
| 48     | 1      | 0    | -0.973928 | -0.616054 | -4.397646 |

**2H<sub>4</sub>SiO<sub>4</sub> Hydrogen-bonded Dimer (12 explicit waters)**

Parameters from the HF/6-31+G(d) level of theory

Mass/ a.m.u. Energy a.u. ZPE a.u.

408.10255 -2094.229835 0.456489

Rotational constant/ cm<sup>-1</sup>

0.006356063834 0.00415153872884 0.00334564787484

Rotational symmetry number

1.0

Vibrational Frequencies/ cm<sup>-1</sup>

```
[ 14.727805      20.44099788      25.22979337      31.81873115
  34.20270336      37.96979647      43.92625182      47.53348674
  51.71065088      56.12412713      56.68015563      60.37774519
  63.85292334      68.26639959      69.3784566       76.15505399
  86.78214877      88.90200744      95.31718631     108.11974262
 121.86059702     125.53038515     126.88570463     132.09847185
 132.30698254     138.1035797      147.62556783     148.23719918
 149.71067472     160.18486167     164.55663578     167.31592723
 170.74245289     172.71635408     179.7431643      190.27295409
 194.3111111      204.66019164     213.75820803     216.78161302
 225.11509023     227.54076458     230.29310567     231.16885057
 247.22417362     257.48984988     260.03368028     269.3193563
 283.62318957     306.87908175     310.27085563     325.31837702
 332.43554187     338.81596895     343.5491616      366.87455734
 367.74335188     374.07512647     391.33286116     402.84960155
 406.95031177     419.25244242     424.04123792     428.26010419
 440.48578092     446.72025053     452.78791158     460.87812631
 471.40791611     472.63117882     476.95430043     513.37416745
 546.98609052     573.36269268     579.20099198     593.37971883
 603.74965043     611.94412051     613.89022027     621.09773976
 627.1028476      648.15547684     655.43249988     674.79619254
 686.41023792     703.86258259     710.50017286     726.95861658
 738.00968309     762.78770331     777.96728147     808.84771451
 817.38275205     821.35835585     882.54234237     896.76277136
 920.74845096     963.12477332     974.37044982     977.95683367
 986.93669401    1001.55329331    1014.43925389    1047.34919098
1104.41161621    1131.25389224    1148.14325805    1171.0863842
1173.51205855    1180.30255666    1270.3027204     1341.67592925
1810.17859642    1820.65973372    1822.71008883    1824.32257149
1837.79236201    1838.48044728    1840.09292994    1844.22144158
1860.06825395    1863.43917676    1893.31875849    1897.12060339
3735.53849746    3762.72134096    3815.41894243    3868.62391991
3907.44165985    3910.06889453    3934.16577983    3951.13854992
3955.89259363    3962.71089316    3962.79429743    3975.15898129
3987.06494163    3988.66352358    3992.80593594    3996.63558226
4000.31232074    4009.49374142    4012.899416      4019.91232551
4036.48197493    4067.35545762    4104.84567951    4109.43291467
4118.30851966    4134.20398452    4145.53306529    4147.44441328
4147.87533537    4149.18895271    4159.22526721    4163.60399168]
```

Ground State Electronic Degeneracy and Irreducible Representation

1 ) (A)

Input orientation:

| Center<br>Number | Atomic<br>Number | Atomic<br>Type | Coordinates (Angstroms) |           |           |
|------------------|------------------|----------------|-------------------------|-----------|-----------|
|                  |                  |                | X                       | Y         | Z         |
| 1                | 14               | 0              | 2.690144                | -0.292510 | -0.405169 |
| 2                | 8                | 0              | 2.736999                | -1.858167 | -0.848834 |
| 3                | 1                | 0              | 1.938449                | -2.384193 | -0.797447 |
| 4                | 8                | 0              | 2.116239                | 0.618408  | -1.640660 |
| 5                | 1                | 0              | 2.412783                | 1.524491  | -1.651455 |
| 6                | 8                | 0              | 1.748426                | -0.070956 | 0.909424  |
| 7                | 1                | 0              | 0.863818                | 0.278675  | 0.798441  |
| 8                | 8                | 0              | -1.752356               | -1.223688 | -0.907020 |
| 9                | 8                | 0              | 4.207198                | 0.175564  | -0.032613 |
| 10               | 1                | 0              | -1.386786               | -0.730863 | -1.654671 |
| 11               | 14               | 0              | -2.138862               | -0.274801 | 0.397305  |
| 12               | 8                | 0              | -3.506536               | 0.563735  | 0.144040  |
| 13               | 1                | 0              | -4.321378               | 0.060726  | 0.063273  |
| 14               | 8                | 0              | -0.937618               | 0.844957  | 0.561150  |
| 15               | 1                | 0              | -0.900608               | 1.508656  | -0.139362 |
| 16               | 8                | 0              | -2.269540               | -1.189697 | 1.704907  |
| 17               | 1                | 0              | -1.623482               | -1.857302 | 1.956299  |
| 18               | 1                | 0              | 4.899687                | -0.479107 | -0.119471 |

|    |   |   |           |           |           |
|----|---|---|-----------|-----------|-----------|
| 19 | 1 | 0 | -1.796034 | 3.249129  | -1.101738 |
| 20 | 8 | 0 | -0.983689 | 2.839630  | -1.405031 |
| 21 | 1 | 0 | -0.274581 | 3.400403  | -1.085729 |
| 22 | 1 | 0 | -0.491705 | -2.677290 | -0.753109 |
| 23 | 8 | 0 | 0.248243  | -3.275436 | -0.635091 |
| 24 | 1 | 0 | 0.047527  | -4.063872 | -1.123128 |
| 25 | 1 | 0 | -5.797799 | -1.790520 | 0.626950  |
| 26 | 8 | 0 | -5.608207 | -1.285392 | -0.152786 |
| 27 | 1 | 0 | -5.266984 | -1.898503 | -0.802957 |
| 28 | 1 | 0 | 4.195207  | 2.228378  | -0.228354 |
| 29 | 8 | 0 | 3.643442  | 2.933949  | -0.560805 |
| 30 | 1 | 0 | 4.217600  | 3.599945  | -0.916397 |
| 31 | 8 | 0 | -0.309095 | -3.060038 | 2.302203  |
| 32 | 1 | 0 | 0.397692  | -2.678685 | 2.820173  |
| 33 | 1 | 0 | 0.079074  | -3.353731 | 1.485221  |
| 34 | 8 | 0 | 1.833015  | -1.494497 | 3.411754  |
| 35 | 1 | 0 | 1.951941  | -0.926879 | 2.652743  |
| 36 | 1 | 0 | 2.675566  | -1.586409 | 3.834749  |
| 37 | 8 | 0 | -0.563369 | 0.352201  | -2.855125 |
| 38 | 1 | 0 | -0.827108 | 1.254904  | -2.688521 |
| 39 | 1 | 0 | 0.373312  | 0.340739  | -2.673664 |
| 40 | 8 | 0 | -3.227627 | 3.526997  | 0.197913  |
| 41 | 1 | 0 | -2.762909 | 3.692612  | 1.010990  |
| 42 | 1 | 0 | -3.560044 | 2.635073  | 0.259181  |
| 43 | 8 | 0 | 1.009548  | 4.124915  | 0.149747  |
| 44 | 1 | 0 | 1.882762  | 3.746102  | 0.161838  |
| 45 | 1 | 0 | 0.614166  | 3.979653  | 1.004705  |
| 46 | 8 | 0 | -0.850993 | 3.161557  | 2.302485  |
| 47 | 1 | 0 | -0.882070 | 2.260752  | 1.987157  |
| 48 | 1 | 0 | -0.840627 | 3.124398  | 3.249944  |
| 49 | 8 | 0 | -4.003611 | -2.740277 | -2.032658 |
| 50 | 1 | 0 | -3.210298 | -2.288763 | -1.752417 |
| 51 | 1 | 0 | -4.112061 | -2.558464 | -2.956874 |
| 52 | 8 | 0 | 5.578129  | -2.259531 | -0.535551 |
| 53 | 1 | 0 | 4.716795  | -2.575176 | -0.795925 |
| 54 | 1 | 0 | 6.201349  | -2.566382 | -1.179948 |

### 2H<sub>4</sub>SiO<sub>4</sub> Dimerization/H<sub>2</sub>O-loss transition state (No explicit waters)

Parameters from the HF/6-31+G(d) level of theory

Mass/ a.m.u. Energy a.u. ZPE a.u.

191.97577 -1181.744121 0.12348

Rotational constant/ cm<sup>-1</sup>

0.0547585489959 0.0222393853551 0.0211673103531

Rotational symmetry number

1.0

Imaginary Frequency/ cm<sup>-1</sup>

-1498.6943

Non-imaginary Vibrational Frequencies/ cm<sup>-1</sup>

|   |               |               |               |               |
|---|---------------|---------------|---------------|---------------|
| [ | 34.94639148   | 47.31107534   | 116.50882267  | 130.15237209  |
|   | 166.16911844  | 214.39764081  | 245.41708098  | 261.63226223  |
|   | 302.74361975  | 309.27000432  | 324.9708592   | 339.18433784  |
|   | 364.22647159  | 371.0169697   | 386.42590962  | 425.22974884  |
|   | 443.56478876  | 455.58890517  | 471.10210043  | 484.09231636  |
|   | 505.79132873  | 570.27673449  | 593.91489627  | 686.5561954   |
|   | 798.44998149  | 826.23055562  | 857.60446396  | 886.1009248   |
|   | 908.06405071  | 925.34263647  | 962.8745605   | 983.20435268  |
|   | 1020.93783703 | 1023.3774121  | 1048.74621259 | 1052.45770286 |
|   | 1087.60565467 | 1105.81558818 | 1360.19862879 | 2168.22620126 |
|   | 4098.31929494 | 4108.64057405 | 4133.93292063 | 4139.79207099 |
|   | 4142.35675246 | 4145.95703703 | 4166.828957   | ]             |

Ground State Electronic Degeneracy and Irreducible Representation

1 ) (A)

Input orientation:

| Center<br>Number | Atomic<br>Number | Atomic<br>Type | Coordinates (Angstroms) |           |           |
|------------------|------------------|----------------|-------------------------|-----------|-----------|
|                  |                  |                | X                       | Y         | Z         |
| 1                | 14               | 0              | -0.026241               | -0.055436 | -1.715825 |
| 2                | 14               | 0              | -0.066505               | 0.019231  | 1.428317  |
| 3                | 8                | 0              | 1.879868                | 0.131292  | 1.613375  |
| 4                | 1                | 0              | 1.633870                | 0.016426  | 0.340115  |
| 5                | 8                | 0              | -0.177901               | -1.293253 | 2.409042  |
| 6                | 1                | 0              | 0.474180                | -1.419416 | 3.080961  |
| 7                | 8                | 0              | -1.585772               | -0.117620 | 0.708826  |
| 8                | 1                | 0              | -2.317422               | -0.165719 | 1.308973  |
| 9                | 8                | 0              | -0.202723               | 1.517322  | 2.066720  |
| 10               | 1                | 0              | 0.593926                | 1.878206  | 2.429221  |
| 11               | 8                | 0              | -0.834133               | 1.338869  | -1.893448 |
| 12               | 1                | 0              | -1.512027               | 1.538995  | -1.259557 |
| 13               | 8                | 0              | 0.648357                | -0.092917 | -0.174436 |
| 14               | 8                | 0              | -0.902755               | -1.401089 | -1.882559 |
| 15               | 1                | 0              | -1.497299               | -1.594835 | -1.167403 |
| 16               | 8                | 0              | 1.203556                | -0.062951 | -2.764648 |
| 17               | 1                | 0              | 1.307370                | 0.678995  | -3.343841 |
| 18               | 1                | 0              | 2.387858                | -0.583003 | 1.973657  |

**2H<sub>4</sub>SiO<sub>4</sub> Dimerization/H<sub>2</sub>O-loss transition state (Dihydrate)**

Parameters from the HF/6-31+G(d) level of theory

Mass/ a.m.u. Energy a.u. ZPE a.u.

227.9969 -1333.818601 0.1783

Rotational constant/ cm<sup>-1</sup>

0.0235793123255 0.0193944171871 0.0139923466654

Rotational symmetry number

1.0

Imaginary Frequency/ cm<sup>-1</sup>

-1651.8617

Non-imaginary Vibrational Frequencies/ cm<sup>-1</sup>

[ 25.0977366 35.80823566 44.8993017 47.58213924  
77.50342311 90.16002193 121.60343384 128.26882553  
146.30500013 175.35748947 183.67011561 204.57678736  
220.18033726 245.92445699 254.41779239 291.97751784  
330.52419389 332.06022263 358.54803049 360.44547776  
372.49044523 405.56024051 415.18648399 427.3843593  
453.03117405 476.1480591 510.69132992 533.2313354  
551.91389314 563.81985348 575.70496276 590.04354781  
626.3244077 644.10341911 668.34626189 718.51393367  
814.18558815 836.21126727 896.33879963 921.69369941  
963.9866175 990.46052465 1006.44634415 1017.60861637  
1047.02252423 1050.08763136 1075.94990716 1093.52735824  
1114.46183142 1143.59077468 1386.82544378 1813.06994464  
1815.04384583 2092.23100547 3951.75018127 3984.97288439  
4032.6384279 4045.96226093 4123.28497478 4123.99391112  
4124.51518784 4125.52993986 4138.94412752 4156.06285509  
4171.03392256]

Ground State Electronic Degeneracy and Irreducible Representation

1 ) (A)

Input orientation:

| Center<br>Number | Atomic<br>Number | Atomic<br>Type | Coordinates (Angstroms) |           |           |
|------------------|------------------|----------------|-------------------------|-----------|-----------|
|                  |                  |                | X                       | Y         | Z         |
| 1                | 14               | 0              | -0.175417               | 0.155722  | -1.647555 |
| 2                | 14               | 0              | -0.157386               | 0.113819  | 1.535652  |
| 3                | 8                | 0              | 1.684474                | 0.140919  | 1.684597  |
| 4                | 1                | 0              | 1.488086                | 0.295646  | 0.411931  |
| 5                | 8                | 0              | -0.198357               | -1.450832 | 2.096700  |
| 6                | 1                | 0              | 0.631342                | -1.731717 | 2.460066  |
| 7                | 8                | 0              | -1.767450               | 0.148128  | 0.998422  |
| 8                | 1                | 0              | -2.236938               | -0.675502 | 0.990082  |
| 9                | 8                | 0              | -0.245300               | 1.440043  | 2.500106  |
| 10               | 1                | 0              | -1.123045               | 1.780453  | 2.604877  |
| 11               | 8                | 0              | -1.464082               | 1.125773  | -1.699496 |
| 12               | 1                | 0              | -1.979397               | 1.134419  | -0.897928 |
| 13               | 8                | 0              | 0.474244                | 0.287897  | -0.113825 |
| 14               | 8                | 0              | -0.440556               | -1.398765 | -1.997653 |
| 15               | 1                | 0              | -0.947068               | -1.956269 | -1.409298 |
| 16               | 8                | 0              | 0.963925                | 0.681977  | -2.691203 |
| 17               | 1                | 0              | 1.227773                | 0.067692  | -3.363753 |
| 18               | 1                | 0              | 2.048567                | 0.908027  | 2.108692  |
| 19               | 1                | 0              | 3.662397                | 2.412897  | -1.080192 |
| 20               | 8                | 0              | 3.074873                | 1.691424  | -0.903077 |
| 21               | 1                | 0              | 2.523538                | 1.583224  | -1.671589 |
| 22               | 1                | 0              | -1.176853               | -2.697277 | 0.918104  |
| 23               | 8                | 0              | -1.751550               | -2.816367 | 0.162781  |
| 24               | 1                | 0              | -2.100948               | -3.696748 | 0.196838  |

### 2H<sub>4</sub>SiO<sub>4</sub> Dimerization/H<sub>2</sub>O-loss transition state (Tetrahydrate)

Parameters from the HF/6-31+G(d) level of theory

Mass/ a.m.u.    Energy a.u.    ZPE a.u.  
 264.01803       -1485.865859    0.233246

Rotational constant/ cm<sup>-1</sup>

0.0173543391809    0.0115036249511    0.00989851452501

Rotational symmetry number

1.0

Imaginary Frequency/ cm<sup>-1</sup>

-1694.983

Non-imaginary Vibrational Frequencies/ cm<sup>-1</sup>

|   |               |               |               |               |
|---|---------------|---------------|---------------|---------------|
| [ | 19.48184871   | 35.52327105   | 38.92199528   | 43.70384042   |
|   | 60.30824162   | 86.98370911   | 88.20002146   | 104.90172765  |
|   | 119.86584476  | 131.59109584  | 135.21918183  | 151.05904384  |
|   | 171.62514814  | 175.85791512  | 180.04897997  | 183.75351988  |
|   | 199.61423296  | 210.44983843  | 216.36459165  | 225.98388477  |
|   | 237.35466767  | 270.95269003  | 284.61709052  | 303.626315    |
|   | 320.24461692  | 343.01398416  | 371.55214713  | 381.47030557  |
|   | 397.97740179  | 408.57669515  | 423.07513839  | 443.80110088  |
|   | 457.6670617   | 461.23954484  | 479.85259901  | 509.42636507  |
|   | 545.32495537  | 560.4767321   | 566.49574066  | 585.90808581  |
|   | 602.52638772  | 628.47901815  | 638.0774602   | 659.92243005  |
|   | 691.36584196  | 720.05691277  | 726.47904199  | 784.10444608  |
|   | 818.08473804  | 836.08616086  | 906.20135522  | 924.23057946  |
|   | 1000.3300306  | 1010.97797645 | 1016.51046007 | 1045.20153088 |
|   | 1046.66805606 | 1082.75430597 | 1132.10878607 | 1159.25687778 |
|   | 1180.7890816  | 1188.77504099 | 1419.64502623 | 1809.10824155 |
|   | 1819.03335035 | 1821.68838646 | 1842.59505821 | 2034.40404104 |

```
3878.45172372 3936.59145418 3941.00493043 3956.86564351
4017.24338869 4018.8002685 4023.82537611 4101.64156525
4122.4856838 4128.51859307 4143.61476696 4149.33491019
4158.69704013 4162.5822893 4165.80725462]
```

Ground State Electronic Degeneracy and Irreducible Representation

1 ) (A)

Input orientation:

| Center<br>Number | Atomic<br>Number | Atomic<br>Type | Coordinates (Angstroms) |           |           |
|------------------|------------------|----------------|-------------------------|-----------|-----------|
|                  |                  |                | X                       | Y         | Z         |
| 1                | 14               | 0              | 1.242499                | -0.208958 | 0.421901  |
| 2                | 14               | 0              | -1.826811               | 0.338814  | -0.495996 |
| 3                | 8                | 0              | -1.584364               | 2.159349  | -0.563675 |
| 4                | 1                | 0              | -0.406353               | 1.728442  | -0.232370 |
| 5                | 8                | 0              | -2.908767               | 0.520566  | 0.755086  |
| 6                | 1                | 0              | -3.156622               | 1.425636  | 0.890295  |
| 7                | 8                | 0              | -1.707970               | -1.352179 | -0.358597 |
| 8                | 1                | 0              | -1.905682               | -1.708612 | 0.498888  |
| 9                | 8                | 0              | -2.223307               | 0.346561  | -2.089880 |
| 10               | 1                | 0              | -2.389089               | -0.508199 | -2.462209 |
| 11               | 8                | 0              | 1.847051                | -1.072290 | -0.811304 |
| 12               | 1                | 0              | 1.363567                | -1.830716 | -1.146318 |
| 13               | 8                | 0              | -0.138054               | 0.627807  | -0.017787 |
| 14               | 8                | 0              | 0.875152                | -1.147364 | 1.681383  |
| 15               | 1                | 0              | 0.017800                | -1.136115 | 2.097556  |
| 16               | 8                | 0              | 2.342931                | 0.937876  | 0.765158  |
| 17               | 1                | 0              | 3.231921                | 0.773931  | 0.448500  |
| 18               | 1                | 0              | -1.609102               | 2.546407  | -1.430056 |
| 19               | 1                | 0              | 1.085486                | 4.101307  | 0.319214  |
| 20               | 8                | 0              | 1.223985                | 3.379028  | -0.277500 |
| 21               | 1                | 0              | 1.818172                | 2.771860  | 0.154132  |
| 22               | 1                | 0              | -2.432172               | -0.562399 | 2.323131  |
| 23               | 8                | 0              | -1.862712               | -1.261891 | 2.641817  |
| 24               | 1                | 0              | -2.192782               | -1.555587 | 3.480328  |
| 25               | 1                | 0              | 3.892342                | -0.616214 | -1.098984 |
| 26               | 8                | 0              | 4.555558                | -0.058852 | -0.700034 |
| 27               | 1                | 0              | 5.282132                | -0.616652 | -0.457728 |
| 28               | 1                | 0              | -0.664887               | -2.621633 | -1.305890 |
| 29               | 8                | 0              | 0.081900                | -3.068858 | -1.706696 |
| 30               | 1                | 0              | 0.078949                | -3.961774 | -1.389682 |

### 2H<sub>4</sub>SiO<sub>4</sub> Dimerization/H<sub>2</sub>O-loss transition state (Hexahydrate)

Parameters from the HF/6-31+G(d) level of theory

Mass/ a.m.u. Energy a.u. ZPE a.u.

300.03916 -1637.964027 0.288365

Rotational constant/ cm<sup>-1</sup>

0.0104442253847 0.00841148578861 0.00697182315374

Rotational symmetry number

1.0

Imaginary Frequency/ cm<sup>-1</sup>

-1600.5568

Non-imaginary Vibrational Frequencies/ cm<sup>-1</sup>

|   |              |              |              |              |
|---|--------------|--------------|--------------|--------------|
| [ | 12.23262709  | 22.6651119   | 29.21234753  | 32.93773851  |
|   | 40.57618008  | 45.68469197  | 51.14767202  | 60.32909269  |
|   | 73.44441503  | 92.07136992  | 114.28470866 | 119.83109298 |
|   | 137.67960796 | 141.07833219 | 154.23535667 | 157.98159872 |
|   | 169.51919018 | 174.36358852 | 181.25139161 | 193.58827405 |
|   | 195.58997666 | 208.78870328 | 211.4576401  | 216.46189663 |



```

231.55807052 236.83339095 239.45367528 249.962614
267.01183801 279.33481973 319.79284376 330.65625066
335.59100363 345.02263713 361.26561981 385.40420724
400.77839538 402.68974336 424.08294005 426.63372082
440.27031988 455.65840873 479.31047122 516.5157285
527.17062471 565.20992474 567.94141477 579.50680765
580.95943212 600.85135185 606.56454473 635.29036732
667.47746735 693.31889208 701.36740468 727.68840399
778.1688418 796.3648746 809.18133162 819.21764611
838.37977844 910.37851936 929.60320488 956.84860158
1002.19967645 1045.48649549 1051.6723126 1076.5476378
1092.27629411 1130.4337502 1140.94963928 1151.70879083
1189.5048284 1210.47405336 1372.59111408 1815.00909405
1816.08639928 1838.02867412 1847.05718695 1855.96754373
1871.32783116 2162.31839841 3830.86958449 3870.05569331
3920.2859183 3930.30833208 3935.43074468 3952.22975585
3972.78890979 3986.44635992 4016.89587088 4021.30239677
4073.4509201 4122.41618024 4125.78710304 4127.69150067
4142.91973133 4147.99349142 4150.2245558 4161.38682802
4163.84725415]
    
```

Ground State Electronic Degeneracy and Irreducible Representation

1 ) (A)

Input orientation:

| Center<br>Number | Atomic<br>Number | Atomic<br>Type | Coordinates (Angstroms) |           |           |
|------------------|------------------|----------------|-------------------------|-----------|-----------|
|                  |                  |                | X                       | Y         | Z         |
| 1                | 14               | 0              | -0.920531               | 1.085364  | 0.275132  |
| 2                | 14               | 0              | 1.687546                | -0.912176 | 0.094471  |
| 3                | 8                | 0              | 1.552568                | -0.974226 | -1.736721 |
| 4                | 1                | 0              | 0.630240                | -0.150134 | -1.394077 |
| 5                | 8                | 0              | 1.325019                | -2.520332 | 0.219115  |
| 6                | 1                | 0              | 1.339358                | -2.974641 | -0.612901 |
| 7                | 8                | 0              | 1.549615                | -0.591755 | 1.759983  |
| 8                | 1                | 0              | 1.055886                | -1.233663 | 2.253080  |
| 9                | 8                | 0              | 3.224492                | -0.302864 | -0.022020 |
| 10               | 1                | 0              | 3.606518                | -0.122820 | 0.826914  |
| 11               | 8                | 0              | -0.356183               | 2.542580  | 0.713081  |
| 12               | 1                | 0              | 0.223720                | 2.569206  | 1.478734  |
| 13               | 8                | 0              | 0.321504                | 0.144438  | -0.343740 |
| 14               | 8                | 0              | -1.587014               | 0.305303  | 1.505846  |
| 15               | 1                | 0              | -1.536499               | -0.652134 | 1.577603  |
| 16               | 8                | 0              | -1.931510               | 1.317018  | -0.982285 |
| 17               | 1                | 0              | -2.021008               | 2.217607  | -1.297367 |
| 18               | 1                | 0              | 2.284110                | -0.655576 | -2.264376 |
| 19               | 1                | 0              | -3.538630               | -0.930093 | -2.749406 |
| 20               | 8                | 0              | -3.726276               | -0.815185 | -1.827513 |
| 21               | 1                | 0              | -3.214707               | -0.060344 | -1.540110 |
| 22               | 1                | 0              | -0.559138               | -2.799541 | 1.091486  |
| 23               | 8                | 0              | -1.330725               | -2.469660 | 1.541679  |
| 24               | 1                | 0              | -2.093449               | -2.803668 | 1.068017  |
| 25               | 1                | 0              | -1.087661               | 4.050572  | -0.545347 |
| 26               | 8                | 0              | -1.641823               | 4.113055  | -1.319202 |
| 27               | 1                | 0              | -2.251212               | 4.824124  | -1.174203 |
| 28               | 1                | 0              | 1.525645                | 1.116043  | 2.624236  |
| 29               | 8                | 0              | 1.389952                | 2.036023  | 2.856701  |
| 30               | 1                | 0              | 1.025195                | 2.045524  | 3.731667  |
| 31               | 8                | 0              | 4.041065                | 0.042302  | -2.733474 |
| 32               | 1                | 0              | 4.171971                | 0.091498  | -1.790056 |
| 33               | 1                | 0              | 4.267950                | 0.887727  | -3.095838 |
| 34               | 8                | 0              | -3.578635               | -3.096103 | -0.098755 |
| 35               | 1                | 0              | -4.441292               | -3.294125 | 0.239429  |
| 36               | 1                | 0              | -3.679517               | -2.351766 | -0.693552 |

-----  
**2H<sub>4</sub>SiO<sub>4</sub> Dimerization/H<sub>2</sub>O-loss transition state (Octahydrate)**

Parameters from the HF/6-31+G(d) level of theory

Mass/ a.m.u. Energy a.u. ZPE a.u.  
 336.06029 -1789.983043 0.343441

Rotational constant/ cm<sup>-1</sup>

0.00824036740778 0.00718763912333 0.00649616075398

Rotational symmetry number

1.0

Imaginary Frequency/ cm<sup>-1</sup>

-1485.835

Non-imaginary Vibrational Frequencies/ cm<sup>-1</sup>

|   |               |               |                |               |
|---|---------------|---------------|----------------|---------------|
| [ | 18.84936629   | 27.64156701   | 35.85688816    | 41.60483282   |
|   | 50.8001542    | 60.3916459    | 62.72696562    | 73.71547893   |
|   | 77.66328131   | 82.41037466   | 88.464135      | 96.13732835   |
|   | 113.16570129  | 115.78598562  | 126.85095285   | 129.06116615  |
|   | 131.91081223  | 140.84202008  | 148.19549705   | 151.47606522  |
|   | 154.94429302  | 163.09706096  | 165.62699065   | 176.52514933  |
|   | 191.73947927  | 193.79678474  | 198.63423272   | 205.04246123  |
|   | 210.25522846  | 217.33069117  | 226.53296291   | 230.2097014   |
|   | 240.82984582  | 246.15381875  | 251.17892636   | 262.52190784  |
|   | 292.3667378   | 312.76603354  | 332.76915897   | 336.32079104  |
|   | 348.85923381  | 353.12675258  | 381.498107     | 383.50675997  |
|   | 399.31882055  | 418.99527924  | 433.18790681   | 441.47273152  |
|   | 456.86777072  | 462.04578617  | 473.72933511   | 489.9862185   |
|   | 494.60125508  | 523.5772905   | 560.72694493   | 571.33318864  |
|   | 581.77262381  | 586.84638391  | 595.29801717   | 612.59050365  |
|   | 622.55731458  | 628.99334452  | 644.92356116   | 676.65888803  |
|   | 712.08485409  | 725.24882893  | 762.94061115   | 775.29834465  |
|   | 798.96430785  | 809.73736012  | 831.08885468   | 858.60531527  |
|   | 898.15979298  | 921.50603979  | 950.60718163   | 992.69158903  |
|   | 1017.51131138 | 1037.9940114  | 1041.72635273  | 1090.64991073 |
|   | 1121.5581452  | 1138.80892954 | 1199.24922793  | 1228.85774577 |
|   | 1250.25094247 | 1269.6493869  | 1402.14402907  | 1810.7068235  |
|   | 1813.9039874  | 1814.68937766 | 1818.15760546  | 1822.50157814 |
|   | 1833.80980785 | 1839.45349716 | 1878.02102428  | 2145.24137297 |
|   | 3750.96133809 | 3815.57185027 | 3906.24619857  | 3948.60862022 |
|   | 3965.90805705 | 3969.7655048  | 3975.49954875  | 3978.38394661 |
|   | 3985.38295541 | 3994.47402145 | 3999.38792336  | 4007.08196778 |
|   | 4021.01743216 | 4025.22239773 | 4092.07787498  | 4093.89886834 |
|   | 4143.90668192 | 4145.49136316 | 4152.74753513  | 4155.77094013 |
|   | 4160.60838811 | 4161.65094156 | 4167.19037553] |               |

Ground State Electronic Degeneracy and Irreducible Representation

1 ) (A)

Input orientation:

| -----  |        |        |                         |           |           |  |
|--------|--------|--------|-------------------------|-----------|-----------|--|
| Center | Atomic | Atomic | Coordinates (Angstroms) |           |           |  |
| Number | Number | Type   | X                       | Y         | Z         |  |
| -----  |        |        |                         |           |           |  |
| 1      | 14     | 0      | 0.810730                | -0.752397 | -1.004127 |  |
| 2      | 14     | 0      | -0.288877               | 1.063112  | 1.564964  |  |
| 3      | 8      | 0      | -2.009245               | 0.999600  | 0.719798  |  |
| 4      | 1      | 0      | -1.258827               | 0.202810  | 0.048147  |  |
| 5      | 8      | 0      | -0.232563               | 2.690449  | 1.349640  |  |
| 6      | 1      | 0      | -1.011108               | 3.105384  | 1.005822  |  |
| 7      | 8      | 0      | 1.352105                | 0.934523  | 1.992989  |  |
| 8      | 1      | 0      | 1.861177                | 1.679386  | 1.678217  |  |
| 9      | 8      | 0      | -0.935747               | 0.342085  | 2.892740  |  |
| 10     | 1      | 0      | -0.327953               | 0.184434  | 3.612713  |  |

|    |   |   |           |           |           |
|----|---|---|-----------|-----------|-----------|
| 11 | 8 | 0 | 1.588370  | -2.022599 | -0.373777 |
| 12 | 1 | 0 | 2.278736  | -1.865102 | 0.279109  |
| 13 | 8 | 0 | -0.154957 | 0.010361  | 0.135200  |
| 14 | 8 | 0 | 1.874340  | 0.353289  | -1.539536 |
| 15 | 1 | 0 | 1.556656  | 1.255244  | -1.678280 |
| 16 | 8 | 0 | -0.219268 | -1.259819 | -2.135721 |
| 17 | 1 | 0 | -0.329646 | -2.202244 | -2.250017 |
| 18 | 1 | 0 | -2.720671 | 0.598643  | 1.218413  |
| 19 | 1 | 0 | 1.403168  | 3.237803  | -0.718328 |
| 20 | 8 | 0 | 1.027139  | 2.974864  | -1.553267 |
| 21 | 1 | 0 | 0.085896  | 3.114908  | -1.477491 |
| 22 | 1 | 0 | 0.771830  | -3.816337 | -1.143690 |
| 23 | 8 | 0 | 0.090200  | -4.070475 | -1.759821 |
| 24 | 1 | 0 | 0.411808  | -4.814327 | -2.250368 |
| 25 | 1 | 0 | 2.791952  | -0.455723 | 1.848317  |
| 26 | 8 | 0 | 3.419350  | -1.067318 | 1.468228  |
| 27 | 1 | 0 | 4.036354  | -0.535578 | 0.975071  |
| 28 | 8 | 0 | -3.677334 | -0.336065 | 2.641128  |
| 29 | 1 | 0 | -2.825953 | -0.284784 | 3.070695  |
| 30 | 1 | 0 | -4.316767 | 0.023965  | 3.240012  |
| 31 | 8 | 0 | -1.929317 | 3.143940  | -1.126148 |
| 32 | 1 | 0 | -2.582045 | 3.393705  | -1.766147 |
| 33 | 1 | 0 | -2.247750 | 2.363001  | -0.674494 |
| 34 | 8 | 0 | 4.504251  | 0.794387  | -0.624198 |
| 35 | 1 | 0 | 3.700425  | 0.562517  | -1.094658 |
| 36 | 1 | 0 | 5.221981  | 0.725084  | -1.239748 |
| 37 | 8 | 0 | 1.237292  | 0.248890  | 4.777696  |
| 38 | 1 | 0 | 1.660025  | 0.596108  | 3.996329  |
| 39 | 1 | 0 | 1.354078  | 0.886183  | 5.468990  |
| 40 | 8 | 0 | 3.099074  | 2.913038  | 0.725567  |
| 41 | 1 | 0 | 3.768203  | 2.387407  | 0.289616  |
| 42 | 1 | 0 | 3.531200  | 3.663336  | 1.111277  |

-----

## 2H<sub>4</sub>SiO<sub>4</sub> Dimerization/H<sub>2</sub>O-loss transition state (Decahydrate)

Parameters from the HF/6-31+G(d) level of theory

Mass/ a.m.u.    Energy a.u.    ZPE a.u.  
372.08142       -1941.990765    0.398503

Rotational constant/ cm<sup>-1</sup>

0.00760926413966    0.00591108933101    0.00549646916068

Rotational symmetry number

1.0

Imaginary Frequency/ cm<sup>-1</sup>

-1655.4711

Non-imaginary Vibrational Frequencies/ cm<sup>-1</sup>

[ 23.42965109    34.04284516    37.49717224    40.97235039  
49.42398366    51.91916157    53.42738888    57.93121977  
60.57235516    61.84427037    71.79718059    74.39661384  
86.94895732    94.69165424    99.79321577    100.50215211  
112.04669393    119.73378799    128.24797446    142.23209134  
147.47961035    149.61336973    157.21010917    161.14401084  
166.31507592    167.94840965    171.4235878    181.00117879  
187.49976193    195.68033129    197.70983533    209.40033463  
222.02913203    226.22019688    232.72573038    234.35211375  
243.11651305    247.00871258    254.65410451    269.95878908  
284.02631023    289.09311998    304.0085846    317.25596371  
334.33298914    349.35270911    361.86335045    377.66846068  
379.53810652    389.2755557    399.20761485    406.1023683  
411.83641225    432.13145265    446.81755551    449.93826549  
477.4686268    486.66394819    490.24338168    495.64380853  
501.41955461    518.09345938    523.87615582    553.87389362

```

577.77616893 587.79163236 596.46567703 603.01986302
612.52100008 615.15518512 630.82128822 640.73249631
649.71235665 667.52611985 680.28697402 692.13038115
710.52102392 736.27209402 740.08783963 758.88160307
786.94019145 806.35948696 824.80573258 850.93212191
904.23440439 923.9386645 944.19200276 961.31768069
1007.08577693 1038.98096199 1044.57599881 1058.96323636
1091.80366988 1108.87374495 1174.83262625 1190.70028968
1216.16639517 1237.85150683 1372.36175232 1806.26554582
1811.46441234 1816.89959097 1817.19845629 1828.81945202
1849.87208126 1850.9632872 1875.19917962 1887.66811882
1907.60174069 2124.94633258 3721.33891954 3750.82928132
3898.79541661 3901.79797054 3947.8649321 3967.29117796
3969.27897986 3977.88352096 3987.32905517 3988.33685684
4000.98650531 4012.5032457 4018.55005568 4050.26453148
4077.63503459 4079.9078011 4086.80255455 4089.55489565
4110.89248949 4123.67419473 4127.03121682 4140.38285128
4150.81533608 4152.14980449 4153.26881186 4153.88739357
4158.23136626]
    
```

Ground State Electronic Degeneracy and Irreducible Representation

1 ) (A)

Input orientation:

| Center<br>Number | Atomic<br>Number | Atomic<br>Type | Coordinates (Angstroms) |           |           |
|------------------|------------------|----------------|-------------------------|-----------|-----------|
|                  |                  |                | X                       | Y         | Z         |
| 1                | 14               | 0              | 1.046464                | -0.471047 | -0.853496 |
| 2                | 14               | 0              | -0.377923               | 1.238159  | 1.486356  |
| 3                | 8                | 0              | -2.020428               | 1.207718  | 0.665544  |
| 4                | 1                | 0              | -1.269209               | 0.541981  | -0.150725 |
| 5                | 8                | 0              | -0.339262               | 2.887397  | 1.390623  |
| 6                | 1                | 0              | -1.164319               | 3.268209  | 1.120115  |
| 7                | 8                | 0              | 1.255640                | 1.093431  | 1.940645  |
| 8                | 1                | 0              | 1.834568                | 1.780305  | 1.641065  |
| 9                | 8                | 0              | -0.963044               | 0.350892  | 2.756210  |
| 10               | 1                | 0              | -0.310502               | 0.064527  | 3.388189  |
| 11               | 8                | 0              | 1.467806                | -1.806246 | -0.049770 |
| 12               | 1                | 0              | 2.074193                | -1.816247 | 0.703459  |
| 13               | 8                | 0              | -0.149031               | 0.358850  | -0.040007 |
| 14               | 8                | 0              | 2.280869                | 0.552564  | -1.079276 |
| 15               | 1                | 0              | 2.046630                | 1.482099  | -1.203480 |
| 16               | 8                | 0              | 0.401118                | -0.966724 | -2.268264 |
| 17               | 1                | 0              | -0.003097               | -1.831312 | -2.247712 |
| 18               | 1                | 0              | -2.722963               | 0.694953  | 1.051034  |
| 19               | 1                | 0              | -2.971773               | -0.248092 | -2.000912 |
| 20               | 8                | 0              | -2.901217               | 0.510959  | -2.574889 |
| 21               | 1                | 0              | -2.543998               | 0.199144  | -3.398130 |
| 22               | 1                | 0              | 0.925144                | 3.411670  | -0.398111 |
| 23               | 8                | 0              | 1.291682                | 3.135778  | -1.231353 |
| 24               | 1                | 0              | 0.546230                | 3.101901  | -1.835862 |
| 25               | 1                | 0              | 0.302148                | -3.352430 | -0.613052 |
| 26               | 8                | 0              | -0.422479               | -3.567484 | -1.198927 |
| 27               | 1                | 0              | -0.336568               | -4.480353 | -1.440465 |
| 28               | 1                | 0              | 2.737501                | -1.592775 | 2.890575  |
| 29               | 8                | 0              | 3.186423                | -1.835276 | 2.085482  |
| 30               | 1                | 0              | 3.776411                | -1.113984 | 1.875938  |
| 31               | 8                | 0              | -3.345488               | -1.024579 | 2.111635  |
| 32               | 1                | 0              | -2.567616               | -0.745226 | 2.594640  |
| 33               | 1                | 0              | -4.054297               | -1.117874 | 2.733839  |
| 34               | 8                | 0              | -1.007940               | 2.728246  | -2.853461 |
| 35               | 1                | 0              | -0.811294               | 2.258850  | -3.658146 |
| 36               | 1                | 0              | -1.736843               | 2.237089  | -2.479098 |
| 37               | 8                | 0              | -2.729562               | -1.760500 | -0.679036 |
| 38               | 1                | 0              | -3.041589               | -1.723649 | 0.220520  |

|    |   |   |           |           |           |
|----|---|---|-----------|-----------|-----------|
| 39 | 1 | 0 | -2.143105 | -2.507149 | -0.744884 |
| 40 | 8 | 0 | 4.447935  | 0.472975  | 0.868497  |
| 41 | 1 | 0 | 3.841900  | 0.519665  | 0.130754  |
| 42 | 1 | 0 | 5.320544  | 0.589542  | 0.517792  |
| 43 | 8 | 0 | 1.638040  | -0.392323 | 4.191548  |
| 44 | 1 | 0 | 1.751580  | 0.291592  | 3.528826  |
| 45 | 1 | 0 | 1.977735  | -0.063175 | 5.012586  |
| 46 | 8 | 0 | -0.620040 | 0.366257  | -4.614611 |
| 47 | 1 | 0 | -0.205745 | 0.135312  | -5.434811 |
| 48 | 1 | 0 | -0.140005 | -0.073804 | -3.915261 |

-----

## 2H<sub>4</sub>SiO<sub>4</sub> Dimerization/H<sub>2</sub>O-loss transition state (12 explicit waters)

Parameters from the HF/6-31+G(d) level of theory

Mass/ a.m.u. Energy a.u. ZPE a.u.

408.10255 -2094.150809 0.44981

Rotational constant/ cm<sup>-1</sup>

0.00627100498973 0.00467390010192 0.00412418647303

Rotational symmetry number

1.0

Imaginary Frequency/ cm<sup>-1</sup>

-1639.9745

Non-imaginary Vibrational Frequencies/ cm<sup>-1</sup>

|   |               |               |               |               |
|---|---------------|---------------|---------------|---------------|
| [ | 19.21078482   | 22.65816154   | 28.53121262   | 30.24100027   |
|   | 33.32000811   | 37.74738507   | 38.73433566   | 45.15646489   |
|   | 54.80355943   | 56.89561668   | 60.27348984   | 62.31689459   |
|   | 64.24214329   | 68.03008747   | 80.29746634   | 85.29477252   |
|   | 88.43633357   | 92.64129913   | 96.07477515   | 107.48030984  |
|   | 109.30130319  | 118.26031246  | 122.42357588  | 125.53038515  |
|   | 127.22627209  | 133.32868492  | 137.8325158   | 144.13648897  |
|   | 149.4118094   | 157.22400988  | 159.2882657   | 171.9170631   |
|   | 174.71110633  | 184.09408734  | 193.97054364  | 196.75763652  |
|   | 202.88785078  | 204.05551064  | 212.29863321  | 213.20912989  |
|   | 218.49835103  | 224.43395531  | 235.37381613  | 238.34856863  |
|   | 238.91849784  | 250.44218859  | 257.11453064  | 267.79027792  |
|   | 284.79084943  | 296.37014303  | 308.05369197  | 325.09596562  |
|   | 333.28348534  | 338.16958582  | 343.62561551  | 350.49256754  |
|   | 359.86164783  | 372.39314024  | 381.05328419  | 387.94108729  |
|   | 392.84803884  | 396.81669229  | 406.9781132   | 419.04393174  |
|   | 425.47301131  | 438.24081584  | 441.81329898  | 446.44223627  |
|   | 462.81727572  | 478.63628666  | 485.50323868  | 493.26678667  |
|   | 494.85841827  | 517.1829627   | 537.95062733  | 546.03389171  |
|   | 555.6740359   | 565.8215561   | 578.93687844  | 585.15049697  |
|   | 587.54141954  | 618.40795187  | 631.80823882  | 655.21008848  |
|   | 662.68867186  | 676.42952627  | 689.69775645  | 733.7143629   |
|   | 751.11805508  | 766.32543466  | 775.27054322  | 791.22856129  |
|   | 800.70189693  | 823.90218626  | 844.62814875  | 864.52006848  |
|   | 885.51014451  | 900.37000628  | 918.18376948  | 992.8236458   |
|   | 1013.09088477 | 1024.3157102  | 1045.64635368 | 1071.07770739 |
|   | 1084.58224968 | 1091.42140028 | 1133.73516944 | 1173.92907993 |
|   | 1207.00582556 | 1222.27575836 | 1412.56261316 | 1812.53476721 |
|   | 1815.87093823 | 1819.42952066 | 1827.22782043 | 1829.16696984 |
|   | 1841.94867507 | 1843.67931379 | 1845.3473993  | 1871.38343401 |
|   | 1881.58655706 | 1885.7150687  | 1889.55166538 | 2093.19015464 |
|   | 3830.53596738 | 3848.66944697 | 3912.77258313 | 3914.89244181 |
|   | 3937.36294373 | 3940.74776725 | 3976.14593189 | 3986.43940957 |
|   | 3988.06579294 | 3994.14735471 | 4002.5781369  | 4008.91686184 |
|   | 4013.28863596 | 4029.7123279  | 4031.35261198 | 4033.71573313 |
|   | 4045.53133884 | 4048.10297067 | 4050.07687186 | 4086.33688068 |
|   | 4109.0784465  | 4124.91830851 | 4126.73930186 | 4139.30554605 |
|   | 4141.35590116 | 4148.36186031 | 4149.63377551 | 4150.12030045 |

4155.027252 4157.08455747 4164.63264441]

Ground State Electronic Degeneracy and Irreducible Representation

1 ) (A)

Input orientation:

| Center<br>Number | Atomic<br>Number | Atomic<br>Type | Coordinates (Angstroms) |           |           |
|------------------|------------------|----------------|-------------------------|-----------|-----------|
|                  |                  |                | X                       | Y         | Z         |
| 1                | 14               | 0              | 0.565652                | -0.008774 | 1.406167  |
| 2                | 14               | 0              | -0.551112               | 0.940851  | -1.502083 |
| 3                | 8                | 0              | -2.210533               | 0.120498  | -1.201774 |
| 4                | 1                | 0              | -1.551341               | -0.082793 | -0.114822 |
| 5                | 8                | 0              | -0.301249               | -0.018033 | -2.831741 |
| 6                | 1                | 0              | -1.077561               | -0.445879 | -3.166087 |
| 7                | 8                | 0              | 1.082043                | 1.408058  | -1.407895 |
| 8                | 1                | 0              | 1.520895                | 1.434350  | -2.247652 |
| 9                | 8                | 0              | -1.280924               | 2.395305  | -1.559738 |
| 10               | 1                | 0              | -0.716290               | 3.164159  | -1.505816 |
| 11               | 8                | 0              | 0.806626                | 1.427588  | 2.118772  |
| 12               | 1                | 0              | 1.367019                | 2.080164  | 1.687644  |
| 13               | 8                | 0              | -0.459262               | 0.174476  | 0.098236  |
| 14               | 8                | 0              | 1.924294                | -0.699336 | 0.862962  |
| 15               | 1                | 0              | 1.892426                | -1.069498 | -0.023777 |
| 16               | 8                | 0              | -0.169178               | -0.971469 | 2.486522  |
| 17               | 1                | 0              | -0.699896               | -0.535891 | 3.147968  |
| 18               | 1                | 0              | -2.933504               | 0.732079  | -1.085447 |
| 19               | 1                | 0              | -2.666054               | -2.081058 | 1.270081  |
| 20               | 8                | 0              | -2.042231               | -2.791823 | 1.136361  |
| 21               | 1                | 0              | -1.338273               | -2.577561 | 1.740900  |
| 22               | 1                | 0              | 1.165861                | -1.338863 | -2.264265 |
| 23               | 8                | 0              | 1.670731                | -1.916096 | -1.695218 |
| 24               | 1                | 0              | 1.084768                | -2.651149 | -1.506105 |
| 25               | 1                | 0              | -0.815908               | 1.726005  | 3.426031  |
| 26               | 8                | 0              | -1.559314               | 1.238913  | 3.776370  |
| 27               | 1                | 0              | -1.693491               | 1.532009  | 4.668339  |
| 28               | 1                | 0              | 2.051629                | 2.483459  | -0.283791 |
| 29               | 8                | 0              | 2.393922                | 3.025131  | 0.430432  |
| 30               | 1                | 0              | 3.303617                | 2.748860  | 0.517550  |
| 31               | 8                | 0              | -5.073942               | 0.523198  | -0.386035 |
| 32               | 1                | 0              | -5.881623               | 0.962537  | -0.615717 |
| 33               | 1                | 0              | -5.103417               | -0.355618 | -0.765530 |
| 34               | 8                | 0              | -0.477804               | -3.715905 | -1.088266 |
| 35               | 1                | 0              | -0.393113               | -4.654337 | -0.983548 |
| 36               | 1                | 0              | -1.058227               | -3.415760 | -0.387272 |
| 37               | 8                | 0              | -3.296114               | -0.203752 | 1.770301  |
| 38               | 1                | 0              | -3.999362               | 0.207075  | 1.274036  |
| 39               | 1                | 0              | -3.011911               | 0.409174  | 2.440379  |
| 40               | 8                | 0              | 4.419273                | 0.936259  | 0.366158  |
| 41               | 1                | 0              | 3.736332                | 0.370051  | 0.710953  |
| 42               | 1                | 0              | 4.848855                | 0.406241  | -0.296363 |
| 43               | 8                | 0              | 4.538076                | -1.629736 | -1.392578 |
| 44               | 1                | 0              | 5.113735                | -2.118712 | -1.965476 |
| 45               | 1                | 0              | 3.643108                | -1.808556 | -1.678626 |
| 46               | 8                | 0              | 0.483101                | 4.678120  | -1.048378 |
| 47               | 1                | 0              | 1.208931                | 4.456223  | -0.470074 |
| 48               | 1                | 0              | 0.241032                | 5.575634  | -0.866023 |
| 49               | 8                | 0              | -4.220959               | -1.938861 | -1.494240 |
| 50               | 1                | 0              | -3.366418               | -1.513637 | -1.494526 |
| 51               | 1                | 0              | -4.097749               | -2.798650 | -1.113519 |
| 52               | 8                | 0              | 3.949111                | -3.127510 | 1.217298  |
| 53               | 1                | 0              | 4.319096                | -2.676771 | 0.466010  |
| 54               | 1                | 0              | 3.297930                | -2.532551 | 1.566989  |

### **H<sub>6</sub>Si<sub>2</sub>O<sub>7</sub> (Monohydrate)**

Parameters from the HF/6-31+G(d) level of theory

Mass/ a.m.u. Energy a.u. ZPE a.u.

191.97577 -1181.831107 0.124797

Rotational constant/ cm<sup>-1</sup>

0.0365519535518 0.0236740445285 0.0184547671309

Rotational symmetry number

1.0

Vibrational Frequencies/ cm<sup>-1</sup>

[ 18.67560738 29.65021998 35.47461856 45.2815713  
64.54795897 105.34655045 167.75379968 192.52486953  
195.83323913 215.61395317 236.13835532 265.44105749  
275.92914514 290.55964516 328.18887417 337.62745803  
345.8705806 371.1281754 378.25924096 388.09399513  
423.49911012 450.63330112 457.56280635 473.40961872  
540.16779099 699.60201418 841.81325445 890.98007492  
893.55170675 913.39497399 927.53199871 936.3450505  
955.67399137 987.30506289 1010.50535223 1016.69116933  
1046.36224038 1066.38621689 1151.73659226 1825.49718171  
4067.16084765 4100.57816074 4102.21844483 4123.74369829  
4136.768666 4139.88242562 4141.30029831 4171.37449002]

Ground State Electronic Degeneracy and Irreducible Representation

1 ) (A)

Input orientation:

| Center<br>Number | Atomic<br>Number | Atomic<br>Type | Coordinates (Angstroms) |           |           |
|------------------|------------------|----------------|-------------------------|-----------|-----------|
|                  |                  |                | X                       | Y         | Z         |
| 1                | 14               | 0              | 0.098372                | 0.213247  | -1.599526 |
| 2                | 14               | 0              | 0.128482                | 0.328915  | 1.386034  |
| 3                | 8                | 0              | 1.748698                | 0.533214  | 1.323841  |
| 4                | 1                | 0              | 2.220974                | 0.789896  | 2.103556  |
| 5                | 8                | 0              | -0.247406               | -0.730092 | 2.563302  |
| 6                | 1                | 0              | -1.036715               | -0.568908 | 3.063562  |
| 7                | 8                | 0              | -0.692687               | 1.698223  | 1.693450  |
| 8                | 1                | 0              | -0.876279               | 2.278740  | 0.964566  |
| 9                | 8                | 0              | -0.756633               | -0.601202 | -2.709503 |
| 10               | 1                | 0              | -0.361135               | -1.356442 | -3.122439 |
| 11               | 8                | 0              | -0.241115               | -0.256888 | -0.080275 |
| 12               | 8                | 0              | 1.675626                | -0.024711 | -1.920804 |
| 13               | 1                | 0              | 2.293110                | 0.081213  | -1.207169 |
| 14               | 8                | 0              | -0.346856               | 1.786390  | -1.616370 |
| 15               | 1                | 0              | -0.351668               | 2.261298  | -2.435707 |
| 16               | 1                | 0              | -0.912752               | -2.685357 | 1.595755  |
| 17               | 8                | 0              | -1.468444               | -3.135301 | 0.971128  |
| 18               | 1                | 0              | -1.520955               | -2.547767 | 0.228620  |

### **H<sub>6</sub>Si<sub>2</sub>O<sub>7</sub> (Trihydrate)**

Parameters from the HF/6-31+G(d) level of theory

Mass/ a.m.u. Energy a.u. ZPE a.u.

227.9969 -1333.906616 0.1811

Rotational constant/  $\text{cm}^{-1}$   
 0.0191659257819 0.017211240184 0.0130466924555  
 Rotational symmetry number  
 1.0

Vibrational Frequencies/  $\text{cm}^{-1}$   
 [ 19.79461474 31.56156796 38.34511571 51.72455159  
 53.05902 69.03093878 86.06626207 138.5484025  
 150.89223529 164.75124576 172.49394267 187.97933651  
 193.21990516 198.46742417 236.77083775 248.73240094  
 257.4550981 263.0848867 275.17850666 285.20787081  
 292.95056773 327.30617892 361.21001696 368.01441577  
 371.55909749 386.80122886 409.97371676 423.56861369  
 438.92195076 451.04337214 463.60961634 473.46522157  
 618.22724261 638.4110773 660.41590535 689.33633792  
 776.82047268 845.53169507 886.1009248 892.54390509  
 906.62532695 955.40292747 958.28732534 973.58505956  
 993.24066717 1022.61982326 1040.14862185 1050.66451093  
 1122.13502477 1172.99773218 1218.05689208 1811.74937695  
 1839.83576676 1852.96498981 3850.05951823 3925.39443018  
 3954.04379885 3974.70025778 4006.62324427 4101.87092701  
 4126.22497549 4143.9414337 4144.434909 4146.19334914  
 4150.37051328 4153.53987575]

Ground State Electronic Degeneracy and Irreducible Representation

1 ) (A)

Input orientation:

| Center<br>Number | Atomic<br>Number | Atomic<br>Type | Coordinates (Angstroms) |           |           |
|------------------|------------------|----------------|-------------------------|-----------|-----------|
|                  |                  |                | X                       | Y         | Z         |
| 1                | 14               | 0              | -0.689761               | 0.235220  | -1.650070 |
| 2                | 14               | 0              | -0.633143               | 0.228789  | 1.500316  |
| 3                | 8                | 0              | 3.135457                | 0.405650  | 1.532738  |
| 4                | 1                | 0              | 3.270156                | 0.551886  | 0.594703  |
| 5                | 8                | 0              | 0.613682                | -0.736469 | 1.928990  |
| 6                | 1                | 0              | 1.505801                | -0.384579 | 1.859404  |
| 7                | 8                | 0              | -1.997986               | -0.579864 | 1.867416  |
| 8                | 1                | 0              | -2.013658               | -1.511442 | 1.684158  |
| 9                | 8                | 0              | -0.641958               | 1.660726  | 2.267384  |
| 10               | 1                | 0              | -0.963523               | 1.690415  | 3.157268  |
| 11               | 8                | 0              | -1.911757               | 1.036201  | -2.370333 |
| 12               | 1                | 0              | -2.772004               | 0.641103  | -2.376985 |
| 13               | 8                | 0              | -0.529706               | 0.553972  | -0.080897 |
| 14               | 8                | 0              | -0.893559               | -1.357988 | -1.870837 |
| 15               | 1                | 0              | -0.739736               | -1.962703 | -1.148945 |
| 16               | 8                | 0              | 0.660750                | 0.810665  | -2.394528 |
| 17               | 1                | 0              | 0.508200                | 1.275965  | -3.206675 |
| 18               | 1                | 0              | 3.321288                | 1.229132  | 1.963791  |
| 19               | 1                | 0              | 3.815747                | 0.211059  | -1.820124 |
| 20               | 8                | 0              | 3.314569                | 0.797610  | -1.269890 |
| 21               | 1                | 0              | 2.440634                | 0.854187  | -1.654677 |
| 22               | 1                | 0              | 0.190958                | -2.496865 | 1.100740  |
| 23               | 8                | 0              | -0.468044               | -2.931834 | 0.560223  |
| 24               | 1                | 0              | -0.294788               | -3.863642 | 0.581776  |

### $\text{H}_6\text{Si}_2\text{O}_7$ (Pentahydrate)

Parameters from the HF/6-31+G(d) level of theory  
 Mass/ a.m.u. Energy a.u. ZPE a.u.  
 264.01803 -1485.969843 0.23569



Rotational constant/  $\text{cm}^{-1}$   
 0.0162435707439 0.0113425134931 0.00903324926206  
 Rotational symmetry number  
 1.0

Vibrational Frequencies/  $\text{cm}^{-1}$   
 [ 17.16738006 29.41390787 31.21405015 42.61958484  
 53.26753069 54.03902024 68.32895279 81.6875376  
 87.43548226 107.09108988 121.13775997 130.81265594  
 144.24074431 152.0042923 172.93876548 181.00812914  
 200.45522607 211.03366836 222.20984129 229.63282182  
 235.08885152 249.7402026 257.05197743 266.16389454  
 273.25325797 294.23638364 315.83114067 327.1185193  
 333.92291812 350.33270935 354.34306493 364.80335116  
 371.74675711 390.95059157 402.58548801 422.03258494  
 430.12279968 441.74379541 452.53769875 457.63230992  
 506.33345652 585.65092262 604.72965067 632.54497659  
 660.81902602 671.0638512 693.35364386 708.33166169  
 797.24756985 844.60729768 876.13411386 916.09171224  
 956.11881417 969.96392392 982.58577097 1000.98336409  
 1046.46649573 1055.65486676 1085.73600883 1132.15743856  
 1144.5568742 1157.69999797 1201.75830656 1797.31348691  
 1803.9788786 1842.32399431 1848.26654895 1850.75477651  
 3836.4020681 3910.33300807 3961.71004185 3972.44139198  
 3974.67940671 4025.28495093 4035.53672648 4044.38453005  
 4053.49644716 4058.86907258 4131.50029592 4142.80852562  
 4145.58171779 4146.4227109 4152.3235634 4161.9776083 ]

Ground State Electronic Degeneracy and Irreducible Representation

1 ) (A)

Input orientation:

| Center<br>Number | Atomic<br>Number | Atomic<br>Type | Coordinates (Angstroms) |           |           |
|------------------|------------------|----------------|-------------------------|-----------|-----------|
|                  |                  |                | X                       | Y         | Z         |
| 1                | 14               | 0              | 1.455543                | -0.905395 | -0.465747 |
| 2                | 14               | 0              | -1.339818               | 0.505576  | 0.029031  |
| 3                | 8                | 0              | 0.737118                | 3.696245  | 0.216121  |
| 4                | 1                | 0              | 1.596980                | 3.353516  | -0.037464 |
| 5                | 8                | 0              | -1.030831               | 1.717889  | 1.065222  |
| 6                | 1                | 0              | -0.478317               | 2.451272  | 0.777824  |
| 7                | 8                | 0              | -2.132041               | -0.668825 | 0.887738  |
| 8                | 1                | 0              | -1.814969               | -0.784225 | 1.779133  |
| 9                | 8                | 0              | -2.300797               | 0.964181  | -1.187214 |
| 10               | 1                | 0              | -2.873001               | 0.310338  | -1.575923 |
| 11               | 8                | 0              | 1.293021                | -2.374494 | -1.124377 |
| 12               | 1                | 0              | 0.457528                | -2.828514 | -1.022289 |
| 13               | 8                | 0              | 0.043295                | -0.110839 | -0.529999 |
| 14               | 8                | 0              | 1.998269                | -0.877171 | 1.063510  |
| 15               | 1                | 0              | 1.384489                | -0.707443 | 1.770995  |
| 16               | 8                | 0              | 2.594144                | -0.132935 | -1.364698 |
| 17               | 1                | 0              | 2.784225                | -0.522007 | -2.207991 |
| 18               | 1                | 0              | 0.504794                | 4.355259  | -0.424078 |
| 19               | 1                | 0              | 3.885750                | 2.455152  | 0.153996  |
| 20               | 8                | 0              | 3.224510                | 2.540021  | -0.519908 |
| 21               | 1                | 0              | 3.092634                | 1.661674  | -0.875103 |
| 22               | 1                | 0              | -0.316674               | 0.786427  | 2.737955  |
| 23               | 8                | 0              | -0.140018               | -0.112576 | 3.011391  |
| 24               | 1                | 0              | 0.038830                | -0.104573 | 3.942706  |
| 25               | 1                | 0              | -2.046973               | -3.242518 | -1.304706 |
| 26               | 8                | 0              | -1.416744               | -3.241349 | -0.594463 |
| 27               | 1                | 0              | -1.711652               | -2.549225 | -0.011258 |
| 28               | 1                | 0              | -4.927545               | -1.516480 | -1.364311 |
| 29               | 8                | 0              | -3.998219               | -1.438449 | -1.193378 |

| 30                                                                | 1                | 0                | -3.892477               | -1.296489 | -0.257492 |
|-------------------------------------------------------------------|------------------|------------------|-------------------------|-----------|-----------|
| <b>H<sub>6</sub>Si<sub>2</sub>O<sub>7</sub> (Heptahydrate)</b>    |                  |                  |                         |           |           |
| Parameters from the HF/6-31+G(d) level of theory                  |                  |                  |                         |           |           |
| Mass/ a.m.u.                                                      | Energy a.u.      | ZPE a.u.         |                         |           |           |
| 300.03916                                                         | -1638.030316     | 0.289124         |                         |           |           |
| Rotational constant/ cm <sup>-1</sup>                             |                  |                  |                         |           |           |
| 0.0128268737167                                                   | 0.00738210699083 | 0.00703353251135 |                         |           |           |
| Rotational symmetry number                                        |                  |                  |                         |           |           |
| 1.0                                                               |                  |                  |                         |           |           |
| Vibrational Frequencies/ cm <sup>-1</sup>                         |                  |                  |                         |           |           |
| [ 22.26199123                                                     | 25.89007722      | 29.99078744      | 34.06369623             |           |           |
| 43.34937225                                                       | 48.28412522      | 52.27362974      | 61.67746181             |           |           |
| 69.64952049                                                       | 76.22455755      | 82.16016183      | 90.72995115             |           |           |
| 92.68995163                                                       | 106.81307563     | 119.66428443     | 129.74925142            |           |           |
| 131.73705333                                                      | 146.84017757     | 148.48046166     | 152.73407971            |           |           |
| 163.79904694                                                      | 170.32543151     | 184.12883912     | 190.97494008            |           |           |
| 216.28118737                                                      | 219.49225198     | 227.90913346     | 236.32601494            |           |           |
| 250.21282683                                                      | 253.06942327     | 272.62077555     | 277.63893279            |           |           |
| 289.68390026                                                      | 310.31255776     | 331.39993878     | 334.84036515            |           |           |
| 350.65242573                                                      | 356.49767538     | 363.70519487     | 375.79186448            |           |           |
| 391.31896045                                                      | 403.42648113     | 405.62279372     | 417.16038518            |           |           |
| 425.69542272                                                      | 435.61358116     | 444.47528544     | 455.15103272            |           |           |
| 459.57840968                                                      | 507.54281851     | 549.89828981     | 579.32609839            |           |           |
| 594.42922263                                                      | 620.88922907     | 637.04880747     | 657.94852887            |           |           |
| 663.27945215                                                      | 697.59336121     | 735.60485981     | 783.72217649            |           |           |
| 816.79197176                                                      | 846.87311384     | 890.34064214     | 911.17085997            |           |           |
| 956.31342415                                                      | 983.39896265     | 1001.12932158    | 1010.45669973           |           |           |
| 1043.58209786                                                     | 1050.91472376    | 1100.22750171    | 1132.21999177           |           |           |
| 1157.24822481                                                     | 1168.84141912    | 1204.41334266    | 1797.80001185           |           |           |
| 1809.42795794                                                     | 1812.09689476    | 1838.08427697    | 1846.96683232           |           |           |
| 1851.30385465                                                     | 1892.60287179    | 3834.34476264    | 3902.34009833           |           |           |
| 3955.69103329                                                     | 3963.92025515    | 3966.72124874    | 3977.44564851           |           |           |
| 4016.05487777                                                     | 4025.77842623    | 4032.28395973    | 4043.32807589           |           |           |
| 4053.19758184                                                     | 4059.18183861    | 4061.315598      | 4069.94099017           |           |           |
| 4143.4479584                                                      | 4144.35150472    | 4149.89788905    | 4151.89959167           |           |           |
| 4162.30427505                                                     | 4168.98356745]   |                  |                         |           |           |
| Ground State Electronic Degeneracy and Irreducible Representation |                  |                  |                         |           |           |
| 1 ) (A)                                                           |                  |                  |                         |           |           |
| Input orientation:                                                |                  |                  |                         |           |           |
| Center Number                                                     | Atomic Number    | Atomic Type      | Coordinates (Angstroms) |           |           |
|                                                                   |                  |                  | X                       | Y         | Z         |
| 1                                                                 | 14               | 0                | 0.542880                | -1.399539 | 0.250373  |
| 2                                                                 | 14               | 0                | -1.447670               | 1.015573  | -0.285615 |
| 3                                                                 | 8                | 0                | 1.729636                | 2.973736  | -0.886117 |
| 4                                                                 | 1                | 0                | 2.422817                | 2.314853  | -0.802429 |
| 5                                                                 | 8                | 0                | -0.685128               | 2.302605  | 0.347761  |
| 6                                                                 | 1                | 0                | 0.124350                | 2.611289  | -0.071245 |
| 7                                                                 | 8                | 0                | -2.712596               | 0.656712  | 0.721009  |
| 8                                                                 | 1                | 0                | -2.525490               | 0.772454  | 1.648060  |
| 9                                                                 | 8                | 0                | -2.049933               | 1.318669  | -1.754434 |
| 10                                                                | 1                | 0                | -2.814716               | 0.825415  | -2.033494 |
| 11                                                                | 8                | 0                | -0.169940               | -2.842085 | 0.119223  |
| 12                                                                | 1                | 0                | -1.124600               | -2.875652 | 0.164231  |
| 13                                                                | 8                | 0                | -0.452224               | -0.254694 | -0.320012 |
| 14                                                                | 8                | 0                | 0.985165                | -0.987867 | 1.775380  |
| 15                                                                | 1                | 0                | 0.406384                | -0.407607 | 2.263382  |

|    |   |   |           |           |           |
|----|---|---|-----------|-----------|-----------|
| 16 | 8 | 0 | 1.967530  | -1.410507 | -0.535879 |
| 17 | 1 | 0 | 2.062900  | -1.702818 | -1.436646 |
| 18 | 1 | 0 | 1.739757  | 3.269040  | -1.786682 |
| 19 | 1 | 0 | 4.063110  | 0.916675  | 0.263409  |
| 20 | 8 | 0 | 3.641371  | 0.866664  | -0.590292 |
| 21 | 1 | 0 | 3.072053  | 0.101601  | -0.508300 |
| 22 | 1 | 0 | -0.500812 | 1.845364  | 2.332399  |
| 23 | 8 | 0 | -0.747944 | 1.125226  | 2.911227  |
| 24 | 1 | 0 | -0.603327 | 1.410217  | 3.804284  |
| 25 | 1 | 0 | -3.556780 | -2.412992 | -0.479068 |
| 26 | 8 | 0 | -3.029947 | -2.377091 | 0.310092  |
| 27 | 1 | 0 | -3.045653 | -1.461378 | 0.568799  |
| 28 | 1 | 0 | -5.453607 | 0.081347  | -1.679652 |
| 29 | 8 | 0 | -4.586395 | -0.116373 | -1.351372 |
| 30 | 1 | 0 | -4.494825 | 0.320352  | -0.509864 |
| 31 | 8 | 0 | 3.389905  | -0.981705 | -2.992473 |
| 32 | 1 | 0 | 4.016318  | -1.359187 | -3.594714 |
| 33 | 1 | 0 | 3.845492  | -0.301417 | -2.505855 |
| 34 | 8 | 0 | 3.712596  | 0.029314  | 2.236194  |
| 35 | 1 | 0 | 4.270853  | -0.618182 | 2.644551  |
| 36 | 1 | 0 | 2.855380  | -0.381176 | 2.133982  |

-----

### H<sub>6</sub>Si<sub>2</sub>O<sub>7</sub> (Nonahydrate)

Parameters from the HF/6-31+G(d) level of theory

Mass/ a.m.u. Energy a.u. ZPE a.u.

336.06029 -1790.10514 0.34619

Rotational constant/ cm<sup>-1</sup>

0.00873270801229 0.00685040582308 0.00608754473737

Rotational symmetry number

1.0

Vibrational Frequencies/ cm<sup>-1</sup>

|   |               |               |               |               |
|---|---------------|---------------|---------------|---------------|
| [ | 18.71730952   | 28.63546796   | 36.35036345   | 38.32426464   |
|   | 47.9852599    | 51.48128912   | 52.93391359   | 61.67051146   |
|   | 63.42200125   | 74.77888344   | 78.18455803   | 80.06115423   |
|   | 91.69605068   | 101.48910271  | 114.43761649  | 114.76428324  |
|   | 118.12130533  | 133.78740844  | 139.74386379  | 148.50131272  |
|   | 150.85053315  | 165.49493388  | 167.35067901  | 174.0647232   |
|   | 180.00032748  | 188.47976217  | 195.22160778  | 204.66019164  |
|   | 212.78515815  | 216.21168381  | 222.34189806  | 223.02998334  |
|   | 231.37736126  | 236.75693703  | 244.90275462  | 263.33509953  |
|   | 271.66857673  | 281.64233802  | 302.99383258  | 325.40178129  |
|   | 333.37383997  | 344.64731789  | 350.3883122   | 354.03724925  |
|   | 373.40094191  | 380.97683028  | 382.9924336   | 398.96435238  |
|   | 404.75399918  | 417.87627188  | 427.91953673  | 434.557127    |
|   | 455.4568484   | 461.90677904  | 478.89344984  | 499.55685912  |
|   | 511.74083372  | 545.0330404   | 573.25148698  | 582.57886514  |
|   | 585.79688011  | 618.99873215  | 627.91603929  | 645.25717826  |
|   | 661.7920759   | 687.58484813  | 697.83662368  | 700.71407118  |
|   | 736.65436362  | 776.6258627   | 789.44231972  | 818.51566013  |
|   | 846.97736918  | 896.92957991  | 910.77468967  | 945.51257046  |
|   | 952.69228852  | 995.70804366  | 1003.8608116  | 1029.4520235  |
|   | 1088.33544208 | 1095.68891905 | 1146.73928608 | 1151.72269155 |
|   | 1166.42269512 | 1207.24213768 | 1212.52440847 | 1793.34483346 |
|   | 1807.05788644 | 1831.05746675 | 1835.68640405 | 1837.07647531 |
|   | 1839.66200785 | 1847.96768363 | 1893.42301384 | 1907.62259176 |
|   | 3755.77098465 | 3859.08108071 | 3909.74222779 | 3929.99556605 |
|   | 3951.03429457 | 3966.54053948 | 3973.04607298 | 3974.52649887 |
|   | 3980.76791883 | 3990.21345304 | 4004.65629343 | 4028.68367516 |
|   | 4037.14920914 | 4043.34892696 | 4050.13247471 | 4055.76226331 |
|   | 4072.06779919 | 4101.21759352 | 4145.88058311 | 4149.70327907 |

4150.12030045 4152.40001732 4155.20101091 4166.37023348]

Ground State Electronic Degeneracy and Irreducible Representation

1 ) (A)

Input orientation:

| Center<br>Number | Atomic<br>Number | Atomic<br>Type | Coordinates (Angstroms) |           |           |
|------------------|------------------|----------------|-------------------------|-----------|-----------|
|                  |                  |                | X                       | Y         | Z         |
| 1                | 14               | 0              | -0.349269               | -1.646646 | 0.685408  |
| 2                | 14               | 0              | 1.468466                | 0.614690  | -0.613810 |
| 3                | 8                | 0              | -1.489778               | 1.755338  | -2.362156 |
| 4                | 1                | 0              | -2.157836               | 1.196592  | -1.963115 |
| 5                | 8                | 0              | 1.016292                | 0.641938  | -2.169925 |
| 6                | 1                | 0              | 0.147773                | 1.011422  | -2.376713 |
| 7                | 8                | 0              | 3.009400                | 0.019751  | -0.550506 |
| 8                | 1                | 0              | 3.157587                | -0.728689 | -1.121415 |
| 9                | 8                | 0              | 1.502614                | 2.113955  | 0.034959  |
| 10               | 1                | 0              | 2.224889                | 2.302950  | 0.631169  |
| 11               | 8                | 0              | 0.433013                | -2.399012 | 1.881580  |
| 12               | 1                | 0              | 1.326398                | -2.134077 | 2.092334  |
| 13               | 8                | 0              | 0.506598                | -0.329083 | 0.258439  |
| 14               | 8                | 0              | -0.565920               | -2.574956 | -0.649468 |
| 15               | 1                | 0              | 0.181543                | -2.649992 | -1.236569 |
| 16               | 8                | 0              | -1.863293               | -1.251891 | 1.111302  |
| 17               | 1                | 0              | -2.017786               | -0.784055 | 1.935645  |
| 18               | 1                | 0              | -1.476667               | 2.556939  | -1.848370 |
| 19               | 1                | 0              | -3.657636               | -0.588852 | -1.493265 |
| 20               | 8                | 0              | -3.380480               | 0.121049  | -0.918595 |
| 21               | 1                | 0              | -2.918369               | -0.329950 | -0.212294 |
| 22               | 1                | 0              | 1.418622                | -1.258634 | -2.823944 |
| 23               | 8                | 0              | 1.780339                | -2.056372 | -2.441215 |
| 24               | 1                | 0              | 2.008653                | -2.639247 | -3.153768 |
| 25               | 1                | 0              | 3.264272                | -0.713503 | 2.880138  |
| 26               | 8                | 0              | 3.120117                | -1.349682 | 2.191392  |
| 27               | 1                | 0              | 3.236960                | -0.877400 | 1.373452  |
| 28               | 1                | 0              | 4.781693                | 2.489060  | 1.532411  |
| 29               | 8                | 0              | 4.056180                | 1.911362  | 1.335435  |
| 30               | 1                | 0              | 4.312538                | 1.368088  | 0.596832  |
| 31               | 8                | 0              | -3.332814               | 2.343774  | 1.096797  |
| 32               | 1                | 0              | -2.594000               | 2.837180  | 0.750662  |
| 33               | 1                | 0              | -3.644899               | 1.794389  | 0.383511  |
| 34               | 8                | 0              | -3.157915               | -2.565992 | -2.031131 |
| 35               | 1                | 0              | -3.682565               | -3.311429 | -1.772790 |
| 36               | 1                | 0              | -2.319497               | -2.657978 | -1.581250 |
| 37               | 8                | 0              | -0.959779               | 3.666170  | -0.156703 |
| 38               | 1                | 0              | -0.113636               | 3.252303  | 0.014442  |
| 39               | 1                | 0              | -0.820134               | 4.603791  | -0.141529 |
| 40               | 8                | 0              | -2.487135               | 0.559110  | 3.135518  |
| 41               | 1                | 0              | -3.131000               | 0.451295  | 3.822112  |
| 42               | 1                | 0              | -2.811799               | 1.246799  | 2.549341  |

**H<sub>6</sub>Si<sub>2</sub>O<sub>7</sub>** (11 explicit waters)

Parameters from the HF/6-31+G(d) level of theory

Mass/ a.m.u. Energy a.u. ZPE a.u.

372.08142 -1942.174981 0.401885

Rotational constant/ cm<sup>-1</sup>

0.00690177469374 0.00563990172161 0.00527198052461

Rotational symmetry number

1.0

Vibrational Frequencies/  $\text{cm}^{-1}$

```
[ 11.32908077 22.90837437 33.8134834 37.04539908
 39.70043519 42.44582593 45.08696132 51.34923235
 53.06597036 59.97462452 64.11703688 75.15420268
 78.49037371 86.25392169 88.83945424 96.25548441
112.24825426 123.50783147 128.08811627 132.52939394
133.77350772 143.79592151 148.46656094 151.0659942
160.15010988 164.87635217 167.88585645 173.89791465
180.72316454 186.19309494 187.4719605 200.14246004
207.45423487 212.81295958 220.89622395 232.62842539
234.61622729 240.78814369 246.40403158 251.53339453
255.30048764 267.31765369 272.25240666 278.93169907
302.21539267 324.95000813 344.73072217 347.47611291
359.26391719 367.2151248 373.52604832 376.12548158
382.52675973 391.88193931 399.40222483 406.60279396
424.80577711 440.47188021 445.30237784 456.04762868
469.48266741 475.25146314 491.20948121 496.491752
526.83005725 534.5519031 538.33289693 564.68169766
580.78567321 596.11120886 606.26567941 634.42852314
638.73079369 654.49420178 682.44158447 694.98697759
711.27166241 722.33662964 743.42401065 757.58883679
788.48317055 804.79565679 839.87410504 849.39609317
867.76588488 904.9641918 934.55185857 942.95483934
962.40193627 992.4413762 1002.59584676 1026.33826388
1041.22592708 1116.89445612 1141.89488774 1162.39148847
1188.05915429 1207.56185407 1207.9858258 1810.56781638
1814.44611519 1828.27732423 1832.39193516 1839.52300072
1850.07364159 1855.26555775 1858.9631473 1871.77960432
1888.85662975 1903.67478938 3781.16758658 3794.02574573
3870.59087074 3915.8793924 3926.41613255 3941.62351214
3944.57046321 3962.27997107 3970.07827084 3988.39245969
3991.23515541 3991.90238962 3994.1960072 3999.4921787
4014.20608299 4020.54480794 4055.92212151 4065.7360246
4090.47234268 4099.18113912 4099.52865694 4104.85262987
4124.87660637 4147.8058318 4148.7927824 4151.2740596
4155.22186198 4156.59803253]
```

Ground State Electronic Degeneracy and Irreducible Representation

1 ) (A)

Input orientation:

| Center<br>Number | Atomic<br>Number | Atomic<br>Type | Coordinates (Angstroms) |           |           |
|------------------|------------------|----------------|-------------------------|-----------|-----------|
|                  |                  |                | X                       | Y         | Z         |
| 1                | 14               | 0              | -0.019789               | -1.597277 | 0.438385  |
| 2                | 14               | 0              | 1.449452                | 0.878573  | -0.891915 |
| 3                | 8                | 0              | -1.638411               | 1.377169  | -2.625332 |
| 4                | 1                | 0              | -2.222319               | 0.863898  | -2.066871 |
| 5                | 8                | 0              | 1.035641                | 0.679424  | -2.447204 |
| 6                | 1                | 0              | 0.117752                | 0.883373  | -2.665763 |
| 7                | 8                | 0              | 3.068243                | 0.683911  | -0.692933 |
| 8                | 1                | 0              | 3.415305                | -0.196139 | -0.770634 |
| 9                | 8                | 0              | 1.128469                | 2.412853  | -0.416982 |
| 10               | 1                | 0              | 1.698336                | 2.766640  | 0.261620  |
| 11               | 8                | 0              | 1.028215                | -2.528907 | 1.232937  |
| 12               | 1                | 0              | 1.578487                | -2.167870 | 1.929470  |
| 13               | 8                | 0              | 0.674148                | -0.181257 | 0.040886  |
| 14               | 8                | 0              | -0.586171               | -2.384468 | -0.865121 |
| 15               | 1                | 0              | 0.046132                | -2.561556 | -1.560253 |
| 16               | 8                | 0              | -1.374056               | -1.245911 | 1.300829  |
| 17               | 1                | 0              | -1.323806               | -0.534121 | 1.941169  |
| 18               | 1                | 0              | -1.739271               | 2.280785  | -2.343109 |
| 19               | 1                | 0              | -3.740843               | -0.707176 | -1.006670 |

|    |   |   |           |           |           |
|----|---|---|-----------|-----------|-----------|
| 20 | 8 | 0 | -3.281468 | 0.042791  | -0.628299 |
| 21 | 1 | 0 | -2.678069 | -0.365430 | -0.012883 |
| 22 | 1 | 0 | 1.369679  | -1.205901 | -3.024073 |
| 23 | 8 | 0 | 1.509893  | -2.124267 | -2.801198 |
| 24 | 1 | 0 | 1.752992  | -2.580086 | -3.595787 |
| 25 | 1 | 0 | 2.200487  | -0.426757 | 3.470100  |
| 26 | 8 | 0 | 2.533445  | -1.307948 | 3.283895  |
| 27 | 1 | 0 | 2.686242  | -1.731552 | 4.117467  |
| 28 | 1 | 0 | 3.949550  | 3.196492  | 1.745301  |
| 29 | 8 | 0 | 3.256809  | 2.598554  | 1.495454  |
| 30 | 1 | 0 | 3.646250  | 1.921351  | 0.945966  |
| 31 | 8 | 0 | -2.928964 | 2.448114  | 1.004223  |
| 32 | 1 | 0 | -2.486048 | 3.040485  | 0.401812  |
| 33 | 1 | 0 | -3.348366 | 1.784969  | 0.460752  |
| 34 | 8 | 0 | -3.628029 | -2.725086 | -1.245370 |
| 35 | 1 | 0 | -3.818704 | -3.109787 | -0.393879 |
| 36 | 1 | 0 | -2.682597 | -2.794651 | -1.336163 |
| 37 | 8 | 0 | -1.287552 | 3.837038  | -1.008231 |
| 38 | 1 | 0 | -0.419656 | 3.480939  | -0.815382 |
| 39 | 1 | 0 | -1.177349 | 4.748397  | -1.244626 |
| 40 | 8 | 0 | -1.392212 | 1.112649  | 2.911470  |
| 41 | 1 | 0 | -1.898773 | 1.109293  | 3.713970  |
| 42 | 1 | 0 | -1.885827 | 1.655988  | 2.284735  |
| 43 | 8 | 0 | -3.396193 | -3.367901 | 1.624590  |
| 44 | 1 | 0 | -3.011401 | -4.164745 | 1.963690  |
| 45 | 1 | 0 | -2.718649 | -2.697615 | 1.665762  |
| 46 | 8 | 0 | 1.498581  | 1.295789  | 3.551988  |
| 47 | 1 | 0 | 2.004619  | 1.827205  | 2.945605  |
| 48 | 1 | 0 | 0.581659  | 1.359677  | 3.294867  |

### H<sub>6</sub>Si<sub>2</sub>O<sub>7</sub> (13 explicit waters)

Parameters from the HF/6-31+G(d) level of theory

Mass/ a.m.u.    Energy a.u.    ZPE a.u.  
 408.10255       -2094.247019    0.458053

Rotational constant/ cm<sup>-1</sup>

0.0057933412054    0.00492107109646    0.00440371318481

Rotational symmetry number

1.0

Vibrational Frequencies/ cm<sup>-1</sup>

|   |              |              |              |              |
|---|--------------|--------------|--------------|--------------|
| [ | 29.28880145  | 32.97249029  | 36.86468982  | 41.27816607  |
|   | 44.48228033  | 48.06171382  | 50.14682071  | 52.0095162   |
|   | 58.50114898  | 60.26653948  | 68.36370458  | 76.44696895  |
|   | 79.88739532  | 82.53548107  | 87.76909937  | 91.2790293   |
|   | 95.37278916  | 97.74981102  | 101.83662052 | 116.97449654 |
|   | 122.44442695 | 127.70584667 | 128.69279727 | 133.37038706 |
|   | 142.60741058 | 145.01918422 | 150.98954028 | 156.1397543  |
|   | 158.00244979 | 162.85379849 | 164.13266404 | 166.04401203 |
|   | 168.19167212 | 181.50160444 | 182.64146287 | 189.58486882 |
|   | 195.80543771 | 206.51593677 | 212.33338499 | 215.44019426 |
|   | 231.73877978 | 236.95849737 | 243.40842801 | 252.986019   |
|   | 258.7270133  | 268.85368243 | 272.23850595 | 276.88829431 |
|   | 289.33638245 | 296.44659694 | 323.14986585 | 325.58944091 |
|   | 353.86349035 | 358.90249866 | 361.00845662 | 370.43313977 |
|   | 383.32605071 | 387.30860487 | 388.85853432 | 399.98605476 |
|   | 409.51499325 | 412.50364646 | 430.36606215 | 436.30861679 |
|   | 437.05925527 | 455.06762844 | 459.272594   | 466.20904959 |
|   | 475.9256477  | 484.82210377 | 491.16082871 | 502.76097338 |
|   | 505.86778265 | 524.33487934 | 530.62495179 | 547.2919062  |
|   | 555.23616345 | 562.71474683 | 578.53375777 | 610.56099961 |

```

629.13235164 637.70214096 649.93476805 653.50030083
680.9264068 696.68981489 702.51421347 724.80400612
769.87011638 774.24189049 785.1191981 795.50998077
825.58417249 830.26871263 847.22063165 853.85822192
876.25922028 915.04220843 946.47171963 966.82236288
978.46420968 997.14676742 1002.22052752 1021.23670235
1114.17686681 1149.0746058 1161.11957327 1181.3937626
1194.32142532 1225.8482415 1243.56469971 1814.76583158
1825.08711069 1826.35902589 1829.29902661 1843.08158315
1848.28044966 1855.64087699 1859.43577153 1862.3827226
1871.57804398 1874.27478223 1885.97918224 1902.67393807
3782.16148753 3791.280355 3800.53822959 3876.0051983
3882.53853323 3895.24378454 3923.33712471 3940.12223518
3952.07684802 3969.05656846 3974.85316561 3986.32820387
3987.16919698 3993.53572335 3995.18990815 4003.96820816
4017.5770058 4019.09913383 4019.48140342 4060.36339918
4064.75602437 4089.03361892 4092.02922249 4102.39915409
4114.12440517 4118.96880351 4123.92440755 4140.42455341
4145.79022848 4147.34710829 4148.59122207 4157.55023134]
    
```

Ground State Electronic Degeneracy and Irreducible Representation

1 ) (A)

Input orientation:

| Center<br>Number | Atomic<br>Number | Atomic<br>Type | Coordinates (Angstroms) |           |           |
|------------------|------------------|----------------|-------------------------|-----------|-----------|
|                  |                  |                | X                       | Y         | Z         |
| 1                | 14               | 0              | -1.068193               | -0.510360 | -0.053956 |
| 2                | 14               | 0              | 1.933492                | -0.395983 | -1.010587 |
| 3                | 8                | 0              | 0.871893                | 2.910990  | -1.918600 |
| 4                | 1                | 0              | 0.084035                | 3.040656  | -1.391120 |
| 5                | 8                | 0              | 1.665691                | 0.304712  | -2.455073 |
| 6                | 1                | 0              | 1.385503                | 1.227594  | -2.415098 |
| 7                | 8                | 0              | 2.509337                | -1.909284 | -1.175023 |
| 8                | 1                | 0              | 1.876368                | -2.561398 | -1.486570 |
| 9                | 8                | 0              | 3.057198                | 0.456217  | -0.176142 |
| 10               | 1                | 0              | 3.568715                | -0.049982 | 0.450596  |
| 11               | 8                | 0              | -1.532731               | -2.061433 | 0.178521  |
| 12               | 1                | 0              | -1.178978               | -2.517284 | 0.950557  |
| 13               | 8                | 0              | 0.540864                | -0.433870 | -0.181649 |
| 14               | 8                | 0              | -1.829069               | 0.037167  | -1.380425 |
| 15               | 1                | 0              | -1.569465               | -0.305120 | -2.233470 |
| 16               | 8                | 0              | -1.534060               | 0.475259  | 1.161420  |
| 17               | 1                | 0              | -0.939880               | 0.584515  | 1.907194  |
| 18               | 1                | 0              | 1.576790                | 3.339336  | -1.442611 |
| 19               | 1                | 0              | -2.137727               | 3.421331  | -0.378075 |
| 20               | 8                | 0              | -1.293227               | 3.249199  | 0.037674  |
| 21               | 1                | 0              | -1.416971               | 2.383708  | 0.417880  |
| 22               | 1                | 0              | 0.302992                | -0.527757 | -3.579018 |
| 23               | 8                | 0              | -0.513147               | -0.998382 | -3.756965 |
| 24               | 1                | 0              | -0.750807               | -0.825716 | -4.658943 |
| 25               | 1                | 0              | 0.360802                | -2.713420 | 2.754626  |
| 26               | 8                | 0              | -0.364067               | -3.235179 | 2.398878  |
| 27               | 1                | 0              | -0.824080               | -3.617506 | 3.133877  |
| 28               | 1                | 0              | 4.756503                | -2.298566 | 1.553368  |
| 29               | 8                | 0              | 3.954064                | -1.864690 | 1.293481  |
| 30               | 1                | 0              | 3.633599                | -2.298223 | 0.503512  |
| 31               | 8                | 0              | 0.884781                | 3.548546  | 1.986717  |
| 32               | 1                | 0              | 1.662505                | 3.600418  | 1.436731  |
| 33               | 1                | 0              | 0.145475                | 3.767136  | 1.424255  |
| 34               | 8                | 0              | -3.797698               | 2.396370  | -1.085481 |
| 35               | 1                | 0              | -4.315987               | 2.028523  | -0.372225 |
| 36               | 1                | 0              | -3.315941               | 1.652549  | -1.431297 |
| 37               | 8                | 0              | 3.063874                | 3.318871  | 0.022266  |
| 38               | 1                | 0              | 3.196433                | 2.371460  | -0.026849 |

|    |   |   |           |           |           |
|----|---|---|-----------|-----------|-----------|
| 39 | 1 | 0 | 3.915440  | 3.730302  | -0.043559 |
| 40 | 8 | 0 | 0.328942  | 1.106589  | 3.206153  |
| 41 | 1 | 0 | -0.005154 | 1.297068  | 4.073843  |
| 42 | 1 | 0 | 0.611617  | 1.951394  | 2.834418  |
| 43 | 8 | 0 | -4.580294 | 0.752415  | 1.218170  |
| 44 | 1 | 0 | -4.795258 | -0.157212 | 1.028258  |
| 45 | 1 | 0 | -3.666895 | 0.736651  | 1.480709  |
| 46 | 8 | 0 | 1.698631  | -1.528047 | 3.237205  |
| 47 | 1 | 0 | 2.469769  | -1.607718 | 2.683467  |
| 48 | 1 | 0 | 1.414701  | -0.617850 | 3.204171  |
| 49 | 8 | 0 | 0.226958  | -3.318366 | -2.065245 |
| 50 | 1 | 0 | -0.433128 | -3.274138 | -1.380935 |
| 51 | 1 | 0 | -0.124977 | -2.832818 | -2.805543 |
| 52 | 8 | 0 | -4.492614 | -2.141683 | 0.526184  |
| 53 | 1 | 0 | -4.960363 | -2.519825 | -0.205903 |
| 54 | 1 | 0 | -3.562422 | -2.242520 | 0.340850  |

-----

## 2H<sub>4</sub>SiO<sub>4</sub> Hydrogen-bonded Dimer (No explicit waters)

Parameters from the DFT/B3LYP/6-31+G(d) level of theory

Mass/ a.m.u.    Energy a.u.    ZPE a.u.  
 191.97577       -1186.0108544    0.117334

Rotational constant/ cm<sup>-1</sup>

0.066962992111    0.0133305555005    0.0131751146321

Rotational symmetry number

1.0

Vibrational Frequencies/ cm<sup>-1</sup>

[ 20.52440216    42.23036488    44.6768903    97.72895995  
 120.33151864    155.34741368    198.35621847    210.31083131  
 225.14289165    232.95509214    288.06446725    289.0583682  
 304.02248531    308.65837297    355.573278    358.57583192  
 363.9067552    366.32547919    372.92136732    384.92463265  
 400.55598398    403.55158754    679.19576808    736.93237787  
 752.60543133    756.79649618    827.46771904    831.29041501  
 850.49424947    850.64020695    900.70362339    913.62433575  
 928.025474    930.29129016    952.84519635    956.8625023  
 1009.57400448    1036.43018123    1049.73316319    1084.76295894  
 3509.49900985    3541.17178351    3802.12986118    3802.41482579  
 3811.88121107    3812.21482817    3815.96802058    3816.25993554]

Ground State Electronic Degeneracy and Irreducible Representation

1 ) (A)

Input orientation:

| Center<br>Number | Atomic<br>Number | Atomic<br>Type | Coordinates (Angstroms) |           |           |
|------------------|------------------|----------------|-------------------------|-----------|-----------|
|                  |                  |                | X                       | Y         | Z         |
| 1                | 14               | 0              | 1.322431                | 1.106544  | -1.505280 |
| 2                | 8                | 0              | 1.384636                | 1.177251  | 0.166584  |
| 3                | 1                | 0              | 2.274600                | 1.175806  | 0.549928  |
| 4                | 8                | 0              | 2.649966                | 0.208676  | -1.907135 |
| 5                | 1                | 0              | 3.009024                | 0.344018  | -2.795467 |
| 6                | 8                | 0              | -0.152448               | 0.531598  | -1.902283 |
| 7                | 1                | 0              | -0.568283               | -0.157009 | -1.337300 |
| 8                | 8                | 0              | -0.728817               | 0.391045  | 1.800131  |
| 9                | 8                | 0              | 1.501933                | 2.563588  | -2.262591 |
| 10               | 1                | 0              | 0.038420                | 0.711763  | 1.275922  |
| 11               | 14               | 0              | -1.332463               | -1.096044 | 1.504120  |



|                                                                        |                 |                 |                         |               |           |
|------------------------------------------------------------------------|-----------------|-----------------|-------------------------|---------------|-----------|
| 12                                                                     | 8               | 0               | -0.554416               | -2.402689     | 2.150127  |
| 13                                                                     | 1               | 0               | -0.805095               | -2.651562     | 3.051014  |
| 14                                                                     | 8               | 0               | -1.222042               | -1.347405     | -0.147734 |
| 15                                                                     | 1               | 0               | -1.224620               | -2.274938     | -0.428212 |
| 16                                                                     | 8               | 0               | -2.871290               | -1.129938     | 2.103769  |
| 17                                                                     | 1               | 0               | -3.327315               | -0.277068     | 2.144369  |
| 18                                                                     | 1               | 0               | 0.683544                | 3.044995      | -2.450957 |
| -----                                                                  |                 |                 |                         |               |           |
| <b>2H<sub>4</sub>SiO<sub>4</sub> Hydrogen-bonded Dimer (Dihydrate)</b> |                 |                 |                         |               |           |
| Parameters from the DFT/B3LYP/6-31+G(d) level of theory                |                 |                 |                         |               |           |
| Mass/ a.m.u.                                                           | Energy a.u.     | ZPE a.u.        |                         |               |           |
| 227.9969                                                               | -1338.8905445   | 0.168407        |                         |               |           |
| Rotational constant/ cm <sup>-1</sup>                                  |                 |                 |                         |               |           |
| 0.0255533446408                                                        | 0.0139930137936 | 0.0105983319967 |                         |               |           |
| Rotational symmetry number                                             |                 |                 |                         |               |           |
| 1.0                                                                    |                 |                 |                         |               |           |
| Vibrational Frequencies/ cm <sup>-1</sup>                              |                 |                 |                         |               |           |
| [                                                                      | 21.789367       | 41.5283789      | 65.97278201             | 67.97448462   |           |
|                                                                        | 82.25051646     | 93.23207942     | 108.93988466            | 122.52783123  |           |
|                                                                        | 140.49450227    | 154.52727164    | 176.55990111            | 181.48075337  |           |
|                                                                        | 196.91054436    | 209.55324247    | 233.49721993            | 239.12005817  |           |
|                                                                        | 259.97807743    | 279.06375584    | 300.53340645            | 310.32645848  |           |
|                                                                        | 324.12291573    | 334.42334377    | 349.48476588            | 364.64349297  |           |
|                                                                        | 374.81186424    | 388.36505902    | 391.59002435            | 393.70293266  |           |
|                                                                        | 403.88520464    | 430.30350894    | 628.27745782            | 662.22299799  |           |
|                                                                        | 703.39690872    | 741.6516698     | 751.84089213            | 760.19522041  |           |
|                                                                        | 819.70417106    | 832.22176275    | 836.77424613            | 868.82233903  |           |
|                                                                        | 876.33567419    | 916.63384003    | 926.33653742            | 936.10178803  |           |
|                                                                        | 950.29441559    | 974.20364127    | 980.43811087            | 1014.8840767  |           |
|                                                                        | 1043.60294893   | 1085.69430669   | 1149.35262005           | 1224.06199993 |           |
|                                                                        | 1681.15218205   | 1691.20239726   | 3315.09059375           | 3455.8909117  |           |
|                                                                        | 3484.60283358   | 3530.70454692   | 3547.82327449           | 3596.07264793 |           |
|                                                                        | 3791.30120606   | 3815.91936808   | 3816.55185051           | 3821.7854688  |           |
|                                                                        | 3824.11383816   | 3825.37185265]  |                         |               |           |
| Ground State Electronic Degeneracy and Irreducible Representation      |                 |                 |                         |               |           |
| 1 ) (A)                                                                |                 |                 |                         |               |           |
| Input orientation:                                                     |                 |                 |                         |               |           |
| -----                                                                  |                 |                 |                         |               |           |
| Center                                                                 | Atomic          | Atomic          | Coordinates (Angstroms) |               |           |
| Number                                                                 | Number          | Type            | X                       | Y             | Z         |
| -----                                                                  |                 |                 |                         |               |           |
| 1                                                                      | 14              | 0               | 0.514540                | -1.853418     | -1.023363 |
| 2                                                                      | 8               | 0               | 0.400883                | -1.821766     | 0.626882  |
| 3                                                                      | 1               | 0               | 1.232705                | -1.784080     | 1.156195  |
| 4                                                                      | 8               | 0               | -1.070473               | -2.098986     | -1.518663 |
| 5                                                                      | 1               | 0               | -1.538154               | -2.816218     | -1.064033 |
| 6                                                                      | 8               | 0               | 1.037799                | -0.478659     | -1.734353 |
| 7                                                                      | 1               | 0               | 0.591221                | 0.355892      | -1.459827 |
| 8                                                                      | 8               | 0               | 0.072156                | 0.708964      | 1.806205  |
| 9                                                                      | 8               | 0               | 1.514310                | -3.086444     | -1.464890 |
| 10                                                                     | 1               | 0               | -0.125696               | -0.166623     | 1.405733  |
| 11                                                                     | 14              | 0               | -0.431809               | 2.014878      | 0.900966  |
| 12                                                                     | 8               | 0               | -1.909133               | 2.593588      | 1.337180  |
| 13                                                                     | 1               | 0               | -1.990085               | 3.015607      | 2.203344  |

|    |   |   |           |           |           |
|----|---|---|-----------|-----------|-----------|
| 14 | 8 | 0 | -0.535257 | 1.556052  | -0.681086 |
| 15 | 1 | 0 | -1.406330 | 1.252889  | -1.050960 |
| 16 | 8 | 0 | 0.680118  | 3.209008  | 1.139186  |
| 17 | 1 | 0 | 1.612569  | 2.952111  | 1.153481  |
| 18 | 1 | 0 | 2.024830  | -2.957137 | -2.276805 |
| 19 | 1 | 0 | -2.864597 | 0.451817  | -2.700894 |
| 20 | 8 | 0 | -2.602208 | 0.231420  | -1.794877 |
| 21 | 1 | 0 | -2.151736 | -0.642426 | -1.833877 |
| 22 | 1 | 0 | 1.709582  | -0.123261 | 2.445898  |
| 23 | 8 | 0 | 2.317881  | -0.885845 | 2.346529  |
| 24 | 1 | 0 | 2.498848  | -1.217667 | 3.238388  |

-----

## 2H<sub>4</sub>SiO<sub>4</sub> Hydrogen-bonded Dimer (Tetrahydrate)

Parameters from the DFT/B3LYP/6-31+G(d) level of theory

Mass/ a.m.u.    Energy a.u.    ZPE a.u.  
 264.01803       -1491.7695253    0.220581

Rotational constant/ cm<sup>-1</sup>

0.0258568879675    0.00764161985689    0.00677868954262

Rotational symmetry number

1.0

Vibrational Frequencies/ cm<sup>-1</sup>

[ 13.60184728    18.02922424    29.1219929    54.53249554  
 57.56980124    69.62171907    94.21903001    103.96342955  
 116.00839702    122.6112355    136.67875666    157.73833625  
 177.02557498    184.58756264    188.52841466    197.78628925  
 212.10402323    223.433104    228.89608406    250.8383589  
 264.28729834    272.71113018    284.49198411    302.97298151  
 304.32830099    311.64702617    326.0690155    330.23227892  
 351.47951813    369.56434523    378.24534025    389.64392458  
 393.16775523    400.13201224    402.98860868    414.90846974  
 430.79698424    482.99416006    580.49375825    643.49873812  
 649.67065451    698.46215574    704.93988782    715.46967761  
 730.26003582    743.39620923    751.48642396    760.59834107  
 837.85155136    877.00985876    878.12886612    898.22234619  
 907.97369608    931.19483648    948.37611725    968.5043491  
 995.33967478    1026.60237742    1070.81359385    1081.23217794  
 1119.43828653    1134.97233286    1161.72425426    1177.46681129  
 1658.84848868    1680.86721744    1683.61260818    1701.85034312  
 3315.39640943    3469.93758178    3482.80269129    3508.59546353  
 3524.35192126    3526.90270202    3592.57661871    3605.79619639  
 3626.12598857    3630.92868478    3684.61323685    3802.30362009  
 3817.00362366    3821.74376666    3823.53000823    3825.39965408]

Ground State Electronic Degeneracy and Irreducible Representation

1 ) (A)

Input orientation:

| Center<br>Number | Atomic<br>Number | Atomic<br>Type | Coordinates (Angstroms) |           |           |
|------------------|------------------|----------------|-------------------------|-----------|-----------|
|                  |                  |                | X                       | Y         | Z         |
| 1                | 14               | 0              | 0.542838                | -1.720052 | -1.208781 |
| 2                | 8                | 0              | 0.537444                | -1.740320 | 0.447624  |
| 3                | 1                | 0              | 1.338993                | -1.424101 | 0.914049  |
| 4                | 8                | 0              | -1.005632               | -2.114042 | -1.644930 |
| 5                | 1                | 0              | -1.128904               | -3.061051 | -1.890466 |
| 6                | 8                | 0              | 1.037654                | -0.292962 | -1.835778 |
| 7                | 1                | 0              | 0.556371                | 0.496459  | -1.492111 |

|    |    |   |           |           |           |
|----|----|---|-----------|-----------|-----------|
| 8  | 8  | 0 | -0.590908 | 0.403613  | 1.976481  |
| 9  | 8  | 0 | 1.573947  | -2.894732 | -1.806224 |
| 10 | 1  | 0 | -0.616570 | -0.416212 | 1.442174  |
| 11 | 14 | 0 | -0.457041 | 1.799771  | 1.070485  |
| 12 | 8  | 0 | -1.462051 | 2.954819  | 1.628866  |
| 13 | 1  | 0 | -1.029242 | 3.789652  | 1.915003  |
| 14 | 8  | 0 | -0.695705 | 1.422967  | -0.523497 |
| 15 | 1  | 0 | -1.570718 | 1.052224  | -0.813276 |
| 16 | 8  | 0 | 1.107491  | 2.370506  | 1.209581  |
| 17 | 1  | 0 | 1.780613  | 1.694093  | 1.411767  |
| 18 | 1  | 0 | 2.230778  | -2.569712 | -2.440167 |
| 19 | 1  | 0 | -3.272790 | 0.232228  | -2.200717 |
| 20 | 8  | 0 | -2.813896 | -0.017589 | -1.385222 |
| 21 | 1  | 0 | -2.327941 | -0.852608 | -1.576103 |
| 22 | 1  | 0 | 1.157936  | -0.037678 | 2.602765  |
| 23 | 8  | 0 | 2.066455  | -0.194404 | 2.257419  |
| 24 | 1  | 0 | 2.630286  | -0.425742 | 3.010975  |
| 25 | 1  | 0 | 1.047831  | 4.193643  | 1.858102  |
| 26 | 8  | 0 | 0.461971  | 4.901953  | 2.197599  |
| 27 | 1  | 0 | 0.599942  | 5.671403  | 1.625703  |
| 28 | 1  | 0 | 0.423971  | -4.471690 | -2.231726 |
| 29 | 8  | 0 | -0.513546 | -4.735345 | -2.327914 |
| 30 | 1  | 0 | -0.647527 | -5.502658 | -1.751875 |

## 2H<sub>4</sub>SiO<sub>4</sub> Hydrogen-bonded Dimer (Hexahydrate)

Parameters from the DFT/B3LYP/6-31+G(d) level of theory

Mass/ a.m.u. Energy a.u. ZPE a.u.

300.03916 1644.65987879 0.271941

Rotational constant/ cm<sup>-1</sup>

0.0145263827818 0.0058837370752 0.00531467672879

Rotational symmetry number

1.0

Vibrational Frequencies/ cm<sup>-1</sup>

[ 19.77376368 20.94837389 27.38440383 30.9985891  
36.36426417 47.64469244 60.79476656 67.55746324  
73.40271289 80.53377846 91.32768179 113.65222623  
122.52783123 127.10811603 146.52741153 154.06159776  
180.0767814 191.07919542 199.23891372 209.12927074  
215.99622276 221.3827489 227.25579997 241.6291368  
255.11282802 260.32559525 267.61651901 276.45042187  
287.36943162 296.12688055 318.15951003 326.60419293  
330.83000956 347.33710578 357.4498742 376.8691697  
379.58675902 395.3988196 400.3127215 404.36477923  
407.54109206 422.59556381 429.19145193 437.44847522  
444.66989542 483.5918907 486.76125317 612.74341148  
638.91150296 667.33150987 679.89775406 701.37435503  
720.73804769 745.59947218 749.380466 769.95352065  
801.45948577 841.6464459 852.16928534 863.42886254  
875.32787253 894.17028846 906.60447588 921.52689086  
943.70547782 948.02859944 951.39952224 967.71895884  
990.19641112 1013.13953726 1133.2486445 1163.21858087  
1183.97929514 1194.01560964 1220.30880752 1327.90032306  
1688.2067937 1701.96154882 1707.98055737 1721.66580893  
1724.07758257 1728.88722913 3164.77523804 3235.14064523  
3315.91768615 3375.55869357 3387.62451211 3418.58139907  
3442.90764613 3496.33503501 3527.77844692 3534.70795215  
3598.49832228 3603.94740162 3723.95920387 3784.15623979  
3812.38858708 3816.62830442 3817.51099967 3819.3041916  
3819.70731227 3823.04348329]

Ground State Electronic Degeneracy and Irreducible Representation

1 ) (A)

Input orientation:

| Center<br>Number | Atomic<br>Number | Atomic<br>Type | Coordinates (Angstroms) |           |           |
|------------------|------------------|----------------|-------------------------|-----------|-----------|
|                  |                  |                | X                       | Y         | Z         |
| 1                | 14               | 0              | 1.840823                | -0.149317 | -0.281194 |
| 2                | 8                | 0              | 0.868179                | 0.704254  | -1.354064 |
| 3                | 1                | 0              | 1.190401                | 0.697689  | -2.268892 |
| 4                | 8                | 0              | 1.528972                | 0.463800  | 1.205747  |
| 5                | 1                | 0              | 1.822539                | 1.400855  | 1.383027  |
| 6                | 8                | 0              | 1.515330                | -1.764007 | -0.321630 |
| 7                | 1                | 0              | 0.579169                | -2.007463 | -0.102419 |
| 8                | 8                | 0              | -1.840486               | -0.109468 | -1.344612 |
| 9                | 8                | 0              | 3.411264                | 0.028336  | -0.782007 |
| 10               | 1                | 0              | -0.916512               | 0.227891  | -1.340208 |
| 11               | 14               | 0              | -2.323959               | -0.972554 | 0.003958  |
| 12               | 8                | 0              | -2.726215               | -0.034153 | 1.289019  |
| 13               | 1                | 0              | -3.487680               | 0.590933  | 1.161423  |
| 14               | 8                | 0              | -1.060632               | -1.913736 | 0.523791  |
| 15               | 1                | 0              | -0.829370               | -1.725088 | 1.480816  |
| 16               | 8                | 0              | -3.644289               | -1.825081 | -0.497530 |
| 17               | 1                | 0              | -3.645615               | -2.118913 | -1.419201 |
| 18               | 1                | 0              | 3.888518                | -0.831196 | -0.903246 |
| 19               | 1                | 0              | -1.206495               | -0.264788 | 2.831980  |
| 20               | 8                | 0              | -0.417137               | -0.835810 | 2.885819  |
| 21               | 1                | 0              | 0.317262                | -0.300182 | 2.518926  |
| 22               | 1                | 0              | -5.615806               | 1.263562  | 0.618839  |
| 23               | 8                | 0              | -4.738501               | 1.674800  | 0.604134  |
| 24               | 1                | 0              | -4.520160               | 1.818183  | -0.349194 |
| 25               | 1                | 0              | 4.328560                | 1.594753  | -0.498277 |
| 26               | 8                | 0              | 4.583608                | 2.505897  | -0.226170 |
| 27               | 1                | 0              | 5.491309                | 2.451982  | 0.107588  |
| 28               | 8                | 0              | 4.057844                | -2.614876 | -1.027166 |
| 29               | 1                | 0              | 3.124283                | -2.760245 | -0.764212 |
| 30               | 1                | 0              | 4.602374                | -3.137515 | -0.419869 |
| 31               | 8                | 0              | -3.806478               | 1.784003  | -1.992857 |
| 32               | 1                | 0              | -3.052849               | 1.155301  | -1.901437 |
| 33               | 1                | 0              | -3.437603               | 2.610800  | -2.336576 |
| 34               | 8                | 0              | 2.525331                | 2.949572  | 1.525932  |
| 35               | 1                | 0              | 3.320780                | 2.940576  | 0.936546  |
| 36               | 1                | 0              | 1.982240                | 3.701564  | 1.246887  |

**2H<sub>4</sub>SiO<sub>4</sub> Dimerization/H<sub>2</sub>O-loss transition state (No explicit waters)**

Parameters from the DFT/B3LYP/6-31+G(d) level of theory

Mass/ a.m.u.    Energy a.u.    ZPE a.u.  
191.97577       -1185.9574879    0.115663

Rotational constant/ cm<sup>-1</sup>  
0.0553105975735    0.0227137134984    0.0211506321483  
Rotational symmetry number  
1.0

Imaginary Frequency/ cm<sup>-1</sup>  
-1020.0138

Non-imaginary Vibrational Frequencies/  $\text{cm}^{-1}$   
[ 53.92781454 74.43831598 112.067545 143.1286873  
199.12075766 211.11707264 236.85424202 289.25992853  
298.23283851 305.97553543 317.55482903 330.16972572  
359.18051292 373.48434618 393.65428017 406.08846759  
432.93769398 455.86691942 467.77287976 526.79530547  
541.59261403 590.67603023 597.05645731 629.81348656  
764.00401566 776.0698342 792.96615037 836.635239  
852.9060231 896.83922528 906.24305736 929.21398493  
952.36562177 954.554984 994.29712133 1019.2419501  
1038.03571353 1082.19827747 1338.65947462 1947.47593479  
3643.75904251 3685.14841428 3781.43865047 3785.17794216  
3811.40163649 3817.27468756 3817.67085787]

Ground State Electronic Degeneracy and Irreducible Representation  
1 ) (A)

Input orientation:

| Center<br>Number | Atomic<br>Number | Atomic<br>Type | Coordinates (Angstroms) |           |           |
|------------------|------------------|----------------|-------------------------|-----------|-----------|
|                  |                  |                | X                       | Y         | Z         |
| 1                | 14               | 0              | -0.060306               | 0.040708  | -1.702575 |
| 2                | 14               | 0              | -0.051637               | 0.026145  | 1.412025  |
| 3                | 8                | 0              | 1.906582                | 0.069622  | 1.500810  |
| 4                | 1                | 0              | 1.587528                | 0.417629  | 0.278383  |
| 5                | 8                | 0              | -0.002989               | -1.646249 | 1.408559  |
| 6                | 1                | 0              | 0.863262                | -2.000745 | 1.662814  |
| 7                | 8                | 0              | -1.644762               | 0.276049  | 0.882845  |
| 8                | 1                | 0              | -2.301024               | 0.274479  | 1.594294  |
| 9                | 8                | 0              | -0.215212               | 0.861964  | 2.847163  |
| 10               | 1                | 0              | 0.501336                | 0.771006  | 3.490364  |
| 11               | 8                | 0              | -1.517931               | 0.763837  | -1.882637 |
| 12               | 1                | 0              | -2.003599               | 0.785086  | -1.033486 |
| 13               | 8                | 0              | 0.553497                | 0.594932  | -0.191177 |
| 14               | 8                | 0              | -0.016176               | -1.594322 | -1.629975 |
| 15               | 1                | 0              | -0.179066               | -1.977835 | -0.748152 |
| 16               | 8                | 0              | 0.944574                | 0.510611  | -2.906745 |
| 17               | 1                | 0              | 0.687821                | 1.313088  | -3.382762 |
| 18               | 1                | 0              | 2.350293                | 0.789796  | 1.975490  |

### 2H<sub>4</sub>SiO<sub>4</sub> Dimerization/H<sub>2</sub>O-loss transition state (Dihydrate)

Parameters from the DFT/B3LYP/6-31+G(d) level of theory

Mass/ a.m.u. Energy a.u. ZPE a.u.  
227.9969 -1338.8424987 0.166146

Rotational constant/  $\text{cm}^{-1}$   
0.0239485677788 0.0191002136551 0.0140690664073

Rotational symmetry number  
1.0

Imaginary Frequency/  $\text{cm}^{-1}$   
-1150.0902

Non-imaginary Vibrational Frequencies/  $\text{cm}^{-1}$   
[ 30.79007841 51.98866513 53.94866561 68.91278272  
87.51193618 111.0805944 129.01251366 137.64485618  
149.91918541 183.58671133 196.91749472 219.58955697  
231.82913442 252.36743728 272.64857697 288.32163043  
311.93894114 332.0810737 332.92206681 357.4498742

```

375.86831839 384.49371056 396.99045119 438.692589
454.15018141 474.23671112 499.95302943 527.53204324
533.35644182 547.7853815 583.39900718 605.14667205
630.43206827 654.70966283 687.30683388 745.89138714
765.14387409 797.04600951 836.69779221 849.06942643
914.05525784 932.01497852 942.55866903 955.70874315
972.90392464 1003.20747811 1033.21911662 1053.46550452
1063.41841474 1107.52537583 1264.13775436 1682.06267873
1687.33799916 1941.06075592 3462.57715446 3531.00341224
3594.59222204 3644.30812066 3741.73821528 3775.98957113
3789.68177305 3791.51666711 3802.25496759 3823.33539825
3831.50206691]
    
```

Ground State Electronic Degeneracy and Irreducible Representation

1 ) (A)

Input orientation:

| Center<br>Number | Atomic<br>Number | Atomic<br>Type | Coordinates (Angstroms) |           |           |
|------------------|------------------|----------------|-------------------------|-----------|-----------|
|                  |                  |                | X                       | Y         | Z         |
| 1                | 14               | 0              | -0.117390               | 0.102948  | -1.664947 |
| 2                | 14               | 0              | -0.175419               | 0.215867  | 1.550353  |
| 3                | 8                | 0              | 1.649639                | -0.092391 | 1.772180  |
| 4                | 1                | 0              | 1.537231                | 0.070145  | 0.445082  |
| 5                | 8                | 0              | -0.510854               | -1.345612 | 2.114268  |
| 6                | 1                | 0              | 0.288076                | -1.760603 | 2.476877  |
| 7                | 8                | 0              | -1.763931               | 0.531789  | 0.967332  |
| 8                | 1                | 0              | -2.336626               | -0.247159 | 0.866593  |
| 9                | 8                | 0              | -0.055794               | 1.569925  | 2.511024  |
| 10               | 1                | 0              | -0.896801               | 2.047176  | 2.578287  |
| 11               | 8                | 0              | -1.311122               | 1.216376  | -1.736066 |
| 12               | 1                | 0              | -1.749845               | 1.307951  | -0.863655 |
| 13               | 8                | 0              | 0.537332                | 0.239025  | -0.103416 |
| 14               | 8                | 0              | -0.531525               | -1.448410 | -1.974970 |
| 15               | 1                | 0              | -1.161442               | -1.880286 | -1.354911 |
| 16               | 8                | 0              | 1.104400                | 0.483864  | -2.715236 |
| 17               | 1                | 0              | 1.309100                | -0.211881 | -3.358101 |
| 18               | 1                | 0              | 2.124694                | 0.635993  | 2.202725  |
| 19               | 1                | 0              | 3.936405                | 1.709819  | -1.085724 |
| 20               | 8                | 0              | 3.339189                | 0.957741  | -0.963530 |
| 21               | 1                | 0              | 2.709621                | 0.985311  | -1.709678 |
| 22               | 1                | 0              | -1.548539               | -2.288358 | 0.948530  |
| 23               | 8                | 0              | -2.136628               | -2.325553 | 0.157177  |
| 24               | 1                | 0              | -2.678186               | -3.125544 | 0.228184  |

### 2H<sub>4</sub>SiO<sub>4</sub> Dimerization/H<sub>2</sub>O-loss transition state (Tetrahydrate)

Parameters from the DFT/B3LYP/6-31+G(d) level of theory

Mass/ a.m.u.    Energy a.u.    ZPE a.u.  
 264.01803       -1491.72627671    0.217741

Rotational constant/ cm<sup>-1</sup>  
 0.0177692929153    0.0116283779227    0.010129674443  
 Rotational symmetry number  
 1.0

Imaginary Frequency/ cm<sup>-1</sup>  
 -1254.4512  
 Non-imaginary Vibrational Frequencies/ cm<sup>-1</sup>

```
[ 30.18539741  37.94199505  48.32582736  50.64724636
  67.1195908  98.5630027  107.36215378  117.28726258
 136.84556521 144.52570892 152.37266118 159.93464884
 190.7803301 206.80785173 214.73125792 219.48530162
 225.27494842 246.30672659 251.90871377 268.10999431
 274.23325821 292.23468103 299.72021476 330.51029317
 335.500649 345.80107704 366.21427349 373.53994903
 381.01853241 413.60180275 422.19244314 438.48407831
 464.79117691 484.31472776 502.62891661 515.50097648
 528.83175986 544.15034515 557.02240502 600.14936587
 622.4113571 664.10654455 675.36612175 682.30257734
 725.13067287 760.33422753 766.50614393 811.7599138
 819.59296535 847.65155374 857.66006681 860.73907466
 936.99143363 945.87398898 955.99370776 968.06647665
 972.89697428 1056.46110809 1075.37302758 1139.76112835
1203.44724314 1212.46880562 1314.3749297 1678.37203953
1686.28849536 1692.52296496 1717.38438945 1783.87149782
3293.73214884 3405.90394918 3420.72905917 3459.71360766
3571.63519518 3590.88768213 3595.65562655 3699.11863045
3778.61680582 3788.65312031 3798.84929301 3815.98887164
3823.057384 3827.83922914 3828.0199384 ]
```

Ground State Electronic Degeneracy and Irreducible Representation

1 ) (A)

Input orientation:

| Center<br>Number | Atomic<br>Number | Atomic<br>Type | Coordinates (Angstroms) |           |           |
|------------------|------------------|----------------|-------------------------|-----------|-----------|
|                  |                  |                | X                       | Y         | Z         |
| 1                | 14               | 0              | 1.285280                | -0.205151 | 0.490203  |
| 2                | 14               | 0              | -1.805703               | 0.333675  | -0.519313 |
| 3                | 8                | 0              | -1.583614               | 2.168307  | -0.594002 |
| 4                | 1                | 0              | -0.344592               | 1.756293  | -0.267645 |
| 5                | 8                | 0              | -2.869276               | 0.520220  | 0.789022  |
| 6                | 1                | 0              | -3.070856               | 1.458851  | 0.929908  |
| 7                | 8                | 0              | -1.704983               | -1.385301 | -0.372048 |
| 8                | 1                | 0              | -1.877127               | -1.728829 | 0.523141  |
| 9                | 8                | 0              | -2.245961               | 0.329786  | -2.125445 |
| 10               | 1                | 0              | -2.426912               | -0.557180 | -2.470532 |
| 11               | 8                | 0              | 1.909311                | -1.181928 | -0.677579 |
| 12               | 1                | 0              | 1.347815                | -1.913870 | -1.047609 |
| 13               | 8                | 0              | -0.091584               | 0.623664  | -0.068283 |
| 14               | 8                | 0              | 0.875424                | -1.001638 | 1.853428  |
| 15               | 1                | 0              | -0.055375               | -1.062464 | 2.153941  |
| 16               | 8                | 0              | 2.426335                | 0.952653  | 0.760718  |
| 17               | 1                | 0              | 3.282789                | 0.778144  | 0.296776  |
| 18               | 1                | 0              | -1.614579               | 2.536897  | -1.491285 |
| 19               | 1                | 0              | 1.063577                | 4.002397  | 0.412868  |
| 20               | 8                | 0              | 1.180220                | 3.263574  | -0.201595 |
| 21               | 1                | 0              | 1.813604                | 2.648005  | 0.222720  |
| 22               | 1                | 0              | -2.397358               | -0.539048 | 2.184422  |
| 23               | 8                | 0              | -1.846917               | -1.296107 | 2.497804  |
| 24               | 1                | 0              | -2.205994               | -1.607039 | 3.341844  |
| 25               | 1                | 0              | 3.729280                | -0.662721 | -1.092783 |
| 26               | 8                | 0              | 4.423679                | -0.012648 | -0.852742 |
| 27               | 1                | 0              | 5.172641                | -0.523398 | -0.511511 |
| 28               | 1                | 0              | -0.654885               | -2.496797 | -1.234597 |
| 29               | 8                | 0              | 0.116694                | -2.955662 | -1.653123 |
| 30               | 1                | 0              | 0.099836                | -3.873392 | -1.344015 |

## 2H<sub>4</sub>SiO<sub>4</sub> Dimerization/H<sub>2</sub>O-loss transition state (Hexahydrate)

Parameters from the DFT/B3LYP/6-31+G(d) level of theory

Mass/ a.m.u. Energy a.u. ZPE a.u.

300.03916 1644.61408252 0.269463

Rotational constant/ cm<sup>-1</sup>

0.0107237520965 0.00857593288754 0.00706922386953

Rotational symmetry number

1.0

Imaginary Frequency/ cm<sup>-1</sup>

-1070.6839

Non-imaginary Vibrational Frequencies/ cm<sup>-1</sup>

|   |                |               |               |               |
|---|----------------|---------------|---------------|---------------|
| [ | 19.32199052    | 25.22284302   | 31.79788008   | 40.08965514   |
|   | 45.97660693    | 53.2814314    | 61.46200077   | 71.10909531   |
|   | 81.68058725    | 97.95137135   | 126.9691089   | 134.51719585  |
|   | 144.14343932   | 161.09535834  | 170.89536073  | 180.96642701  |
|   | 194.6933807    | 196.7298351   | 211.47849117  | 215.50969782  |
|   | 220.7780679    | 234.37991518  | 250.63679857  | 260.31864489  |
|   | 274.69198172   | 281.52418197  | 285.79865109  | 295.57085205  |
|   | 300.58205894   | 317.83979364  | 326.20107227  | 334.15923023  |
|   | 348.36575851   | 361.2030666   | 370.66945188  | 390.01924382  |
|   | 404.69144597   | 408.4724398   | 415.3115904   | 418.6686125   |
|   | 446.57429304   | 459.62011182  | 492.14082895  | 529.61715013  |
|   | 549.55772235   | 555.13190811  | 565.65474755  | 592.42056966  |
|   | 630.7448343    | 645.5212918   | 652.86086805  | 669.05519823  |
|   | 718.45833082   | 754.79479356  | 759.73649689  | 773.68586199  |
|   | 797.10856272   | 809.20913304  | 816.58346108  | 857.65311646  |
|   | 868.21765804   | 886.46929368  | 917.26632245  | 935.01753244  |
|   | 959.5661909    | 1003.7496059  | 1011.73556529 | 1016.61471541 |
|   | 1065.94139408  | 1079.75175205 | 1144.31361173 | 1152.34822361 |
|   | 1211.05788329  | 1222.56072297 | 1268.62073417 | 1686.22594215 |
|   | 1690.40310629  | 1704.53318065 | 1725.68311487 | 1731.01403816 |
|   | 1751.1909225   | 2030.96361468 | 3126.57607981 | 3298.60434861 |
|   | 3383.09983016  | 3400.64947982 | 3438.54282237 | 3450.17771882 |
|   | 3468.8533262   | 3528.16766687 | 3592.47236337 | 3602.87009639 |
|   | 3647.79024916  | 3772.88971222 | 3785.935531   | 3792.54531984 |
|   | 3811.38773577  | 3812.6874524  | 3816.48234694 | 3821.54220633 |
|   | 3825.19114339] |               |               |               |

Ground State Electronic Degeneracy and Irreducible Representation

1 ) (A)

Input orientation:

| Center Number | Atomic Number | Atomic Type | Coordinates (Angstroms) |           |           |
|---------------|---------------|-------------|-------------------------|-----------|-----------|
|               |               |             | X                       | Y         | Z         |
| 1             | 14            | 0           | -0.941187               | 1.103518  | 0.364570  |
| 2             | 14            | 0           | 1.668339                | -0.946388 | 0.126231  |
| 3             | 8             | 0           | 1.491181                | -1.075804 | -1.697691 |
| 4             | 1             | 0           | 0.586094                | -0.149954 | -1.369673 |
| 5             | 8             | 0           | 1.179757                | -2.539319 | 0.350688  |
| 6             | 1             | 0           | 1.148068                | -3.015594 | -0.494507 |
| 7             | 8             | 0           | 1.610585                | -0.542544 | 1.808655  |
| 8             | 1             | 0           | 1.040373                | -1.122361 | 2.335954  |
| 9             | 8             | 0           | 3.269038                | -0.442647 | -0.031273 |
| 10            | 1             | 0           | 3.672381                | -0.270860 | 0.833846  |
| 11            | 8             | 0           | -0.382853               | 2.574688  | 0.843306  |
| 12            | 1             | 0           | 0.299187                | 2.551186  | 1.567080  |



|    |   |   |           |           |           |
|----|---|---|-----------|-----------|-----------|
| 13 | 8 | 0 | 0.338271  | 0.196838  | -0.312843 |
| 14 | 8 | 0 | -1.577683 | 0.258184  | 1.587444  |
| 15 | 1 | 0 | -1.589327 | -0.744096 | 1.563215  |
| 16 | 8 | 0 | -1.964953 | 1.377275  | -0.904729 |
| 17 | 1 | 0 | -2.049258 | 2.331303  | -1.155397 |
| 18 | 1 | 0 | 2.259785  | -0.793186 | -2.248125 |
| 19 | 1 | 0 | -3.424839 | -0.696117 | -2.825707 |
| 20 | 8 | 0 | -3.677210 | -0.603562 | -1.894904 |
| 21 | 1 | 0 | -3.129786 | 0.135225  | -1.542056 |
| 22 | 1 | 0 | -0.639694 | -2.680720 | 1.080180  |
| 23 | 8 | 0 | -1.500147 | -2.402131 | 1.451756  |
| 24 | 1 | 0 | -2.191116 | -2.681765 | 0.800590  |
| 25 | 1 | 0 | -1.115441 | 3.961910  | -0.290815 |
| 26 | 8 | 0 | -1.694345 | 4.094384  | -1.071736 |
| 27 | 1 | 0 | -2.384605 | 4.718580  | -0.802721 |
| 28 | 1 | 0 | 1.624655  | 1.110897  | 2.487185  |
| 29 | 8 | 0 | 1.530994  | 2.072565  | 2.700503  |
| 30 | 1 | 0 | 1.256248  | 2.119311  | 3.628566  |
| 31 | 8 | 0 | 3.940036  | -0.255734 | -2.698406 |
| 32 | 1 | 0 | 4.085997  | -0.173526 | -1.732577 |
| 33 | 1 | 0 | 4.114200  | 0.615937  | -3.082902 |
| 34 | 8 | 0 | -3.404603 | -2.940441 | -0.457562 |
| 35 | 1 | 0 | -4.279122 | -3.210130 | -0.140463 |
| 36 | 1 | 0 | -3.543637 | -2.109231 | -0.976562 |

### H<sub>6</sub>Si<sub>2</sub>O<sub>7</sub> (Monohydrate)

Parameters from the DFT/B3LYP/6-31+G(d) level of theory

Mass/ a.m.u.    Energy a.u.    ZPE a.u.  
 191.97577    -1186.00613785    0.11625

Rotational constant/ cm<sup>-1</sup>

0.0374315620709    0.0231480139504    0.0185101387707

Rotational symmetry number

1.0

Vibrational Frequencies/ cm<sup>-1</sup>

[ 15.38113849    26.89092853    40.61093187    50.92526062  
 77.0446996    123.32017185    179.70841252    182.80132107  
 210.01891634    215.27338571    230.80048168    265.46885891  
 272.30800951    280.42602567    307.68532308    322.32972381  
 331.34433593    358.63838512    363.05186138    376.0420773  
 399.36747305    413.60180275    457.13188426    477.93430067  
 562.83985324    662.85548041    772.72671282    830.58147867  
 833.8689972    865.68077799    872.05425471    897.72887089  
 910.87199465    927.95597044    945.57512366    954.58278543  
 991.0096028    1011.21428857    1052.70096533    1701.90594597  
 3708.20969649    3731.99381575    3752.89353715    3798.39751985  
 3813.24348091    3815.07142461    3817.43454576    3818.55355312]

Ground State Electronic Degeneracy and Irreducible Representation

1 ) (A)

Input orientation:

| Center<br>Number | Atomic<br>Number | Atomic<br>Type | Coordinates (Angstroms) |           |           |
|------------------|------------------|----------------|-------------------------|-----------|-----------|
|                  |                  |                | X                       | Y         | Z         |
| 1                | 14               | 0              | -1.630114               | 0.098374  | -0.040110 |
| 2                | 14               | 0              | 1.248488                | -0.564876 | -0.013719 |

|    |   |   |           |           |           |
|----|---|---|-----------|-----------|-----------|
| 3  | 8 | 0 | 0.997204  | -1.284524 | 1.458325  |
| 4  | 1 | 0 | 1.664471  | -1.904012 | 1.786345  |
| 5  | 8 | 0 | 2.688101  | 0.241285  | 0.012852  |
| 6  | 1 | 0 | 3.169395  | 0.273066  | -0.827903 |
| 7  | 8 | 0 | 1.285111  | -1.606624 | -1.287931 |
| 8  | 1 | 0 | 0.406727  | -1.845413 | -1.632924 |
| 9  | 8 | 0 | -2.612507 | 1.315394  | -0.534161 |
| 10 | 1 | 0 | -2.955447 | 1.906045  | 0.151762  |
| 11 | 8 | 0 | -0.025273 | 0.473898  | -0.131767 |
| 12 | 8 | 0 | -2.038137 | -0.284893 | 1.510388  |
| 13 | 1 | 0 | -1.334453 | -0.714944 | 2.025026  |
| 14 | 8 | 0 | -1.757576 | -1.164436 | -1.112741 |
| 15 | 1 | 0 | -2.641625 | -1.506594 | -1.307953 |
| 16 | 1 | 0 | 2.306187  | 2.305654  | 0.280614  |
| 17 | 8 | 0 | 1.859248  | 3.141723  | 0.062696  |
| 18 | 1 | 0 | 0.965573  | 2.858707  | -0.186725 |

-----

### H<sub>6</sub>Si<sub>2</sub>O<sub>7</sub> (Trihydrate)

Parameters from the DFT/B3LYP/6-31+G(d) level of theory

Mass/ a.m.u.    Energy a.u.    ZPE a.u.  
 227.9969       -1338.9020385    0.169054

Rotational constant/ cm<sup>-1</sup>

0.0195435203377    0.0173306561301    0.0132344890411

Rotational symmetry number

1.0

Vibrational Frequencies/ cm<sup>-1</sup>

[    25.07688553    34.98809362    44.71859244    57.81306371  
    61.58710718    79.59548036    100.72456351    140.18868659  
   170.22117616    175.99692225    191.50316716    206.0016104  
   213.14657668    229.81353109    242.2338178    253.23623182  
   259.41509857    270.11169692    291.56744682    300.71411571  
   319.37582238    338.36419579    349.70717728    359.97285353  
   377.63370889    387.1765481    402.03640987    414.08137734  
   429.91428899    461.87897762    497.40919903    508.41856341  
   602.54723879    676.23491629    723.51819021    777.63366437  
   783.72217649    829.70573377    839.97141003    868.14120412  
   900.85653122    912.59568302    919.25412435    929.84646735  
   963.40278758    994.71414271    1010.39414653    1031.41202398  
 1101.56197012    1124.61630197    1165.88751769    1679.79686257  
 1705.56183338    1729.89503079    3233.71582218    3389.75132114  
 3436.01984303    3514.41986211    3529.18241889    3732.44558891  
 3809.82390561    3813.53539587    3815.72475811    3820.83326999  
 3821.98007878    3822.9461783 ]

Ground State Electronic Degeneracy and Irreducible Representation

1 ) (A)

Input orientation:

| Center<br>Number | Atomic<br>Number | Atomic<br>Type | Coordinates (Angstroms) |           |           |
|------------------|------------------|----------------|-------------------------|-----------|-----------|
|                  |                  |                | X                       | Y         | Z         |
| 1                | 14               | 0              | -0.212143               | 0.377415  | -1.725493 |
| 2                | 14               | 0              | -0.816010               | 0.537245  | 1.356588  |
| 3                | 8                | 0              | 2.649757                | -0.758664 | 1.993615  |
| 4                | 1                | 0              | 3.010697                | -0.634903 | 1.078217  |
| 5                | 8                | 0              | -0.041258               | -0.806259 | 1.943786  |

|    |   |   |           |           |           |
|----|---|---|-----------|-----------|-----------|
| 6  | 1 | 0 | 0.954769  | -0.787178 | 1.996237  |
| 7  | 8 | 0 | -2.428392 | 0.196012  | 1.403741  |
| 8  | 1 | 0 | -2.659835 | -0.721923 | 1.179625  |
| 9  | 8 | 0 | -0.524273 | 1.917055  | 2.203220  |
| 10 | 1 | 0 | -0.985448 | 2.004788  | 3.049007  |
| 11 | 8 | 0 | -0.896816 | 1.449080  | -2.777667 |
| 12 | 1 | 0 | -1.836391 | 1.326460  | -2.972459 |
| 13 | 8 | 0 | -0.276589 | 0.843391  | -0.163128 |
| 14 | 8 | 0 | -0.880710 | -1.102747 | -1.935401 |
| 15 | 1 | 0 | -1.101195 | -1.656945 | -1.154196 |
| 16 | 8 | 0 | 1.406804  | 0.419619  | -2.146118 |
| 17 | 1 | 0 | 1.582903  | 0.829357  | -3.006023 |
| 18 | 1 | 0 | 3.041254  | -0.056528 | 2.534278  |
| 19 | 1 | 0 | 3.853641  | -1.249923 | -0.990240 |
| 20 | 8 | 0 | 3.533122  | -0.437151 | -0.571792 |
| 21 | 1 | 0 | 2.804691  | -0.105086 | -1.146053 |
| 22 | 1 | 0 | -0.842436 | -2.198916 | 1.089227  |
| 23 | 8 | 0 | -1.520531 | -2.483618 | 0.428823  |
| 24 | 1 | 0 | -1.597426 | -3.448182 | 0.474418  |

### H<sub>6</sub>Si<sub>2</sub>O<sub>7</sub> (Pentahydrate)

Parameters from the DFT/B3LYP/6-31+G(d) level of theory

Mass/ a.m.u.    Energy a.u.    ZPE a.u.  
 264.01803       -1491.78213665    0.220518

Rotational constant/ cm<sup>-1</sup>

0.01658047048    0.0115860152826    0.00894285339226

Rotational symmetry number

1.0

Vibrational Frequencies/ cm<sup>-1</sup>

[ 20.09348007    27.55121238    39.63093163    45.90015301  
 50.77930313    60.15533378    75.13335161    90.08356802  
 119.16385878    133.7457063    145.13734027    152.60202294  
 158.70443577    186.56146383    199.78799187    206.64799354  
 213.35508737    222.36274913    228.36090662    234.4563691  
 247.31452825    255.0850266    270.06304443    272.31495987  
 294.15992972    307.2057485    327.15327108    329.1549737  
 337.19653594    349.88788654    354.59327776    379.05853194  
 392.72988278    404.32307709    415.57570394    425.39655739  
 434.557127    455.88082013    515.79289144    574.19673544  
 600.00340838    615.07178084    659.90157899    681.2113714  
 695.84882177    719.43833106    742.43706006    774.797919  
 820.92743376    853.03807987    881.06191648    902.60802101  
 907.02844762    929.86731842    966.69725646    1004.27783298  
 1016.51046007    1049.00337578    1074.82394943    1107.69218438  
 1120.29318035    1131.67091362    1174.56156235    1665.10380935  
 1680.58225284    1703.87984716    1710.84410417    1734.30850704  
 3200.88928937    3362.38776838    3450.18466917    3470.02793641  
 3534.51334217    3561.81434172    3574.79065694    3595.96839258  
 3623.15123608    3642.695638    3808.09326689    3815.00192105  
 3815.79426167    3817.84461678    3819.10958162    3828.43695978]

Ground State Electronic Degeneracy and Irreducible Representation

1 ) (A)

Input orientation:

-----  
 Center            Atomic            Atomic            Coordinates (Angstroms)

| Number | Number | Type | X         | Y         | Z         |
|--------|--------|------|-----------|-----------|-----------|
| 1      | 14     | 0    | 1.643141  | -0.884748 | -0.421129 |
| 2      | 14     | 0    | -1.270764 | 0.272951  | -0.330779 |
| 3      | 8      | 0    | 0.577429  | 3.465024  | 0.200271  |
| 4      | 1      | 0    | 1.480683  | 3.140652  | -0.056491 |
| 5      | 8      | 0    | -1.138785 | 1.487805  | 0.785775  |
| 6      | 1      | 0    | -0.539324 | 2.253174  | 0.553020  |
| 7      | 8      | 0    | -2.007467 | -0.991527 | 0.519042  |
| 8      | 1      | 0    | -1.697079 | -1.038415 | 1.447793  |
| 9      | 8      | 0    | -2.193497 | 0.584196  | -1.638558 |
| 10     | 1      | 0    | -3.155549 | 0.443845  | -1.504743 |
| 11     | 8      | 0    | 1.643526  | -2.447054 | -0.903574 |
| 12     | 1      | 0    | 0.784458  | -2.923736 | -0.822371 |
| 13     | 8      | 0    | 0.208947  | -0.181016 | -0.841894 |
| 14     | 8      | 0    | 1.975163  | -0.591760 | 1.158889  |
| 15     | 1      | 0    | 1.236981  | -0.553735 | 1.799447  |
| 16     | 8      | 0    | 2.889141  | -0.121848 | -1.223021 |
| 17     | 1      | 0    | 3.149444  | -0.525070 | -2.063683 |
| 18     | 1      | 0    | 0.322904  | 4.115357  | -0.470956 |
| 19     | 1      | 0    | 3.645181  | 2.535083  | 0.320395  |
| 20     | 8      | 0    | 3.077078  | 2.565784  | -0.464461 |
| 21     | 1      | 0    | 3.071357  | 1.644780  | -0.811279 |
| 22     | 1      | 0    | -0.630348 | 0.654100  | 2.343742  |
| 23     | 8      | 0    | -0.397941 | -0.221764 | 2.737942  |
| 24     | 1      | 0    | -0.381597 | -0.125469 | 3.702078  |
| 25     | 1      | 0    | -1.413080 | -3.804720 | -1.288263 |
| 26     | 8      | 0    | -0.941353 | -3.456814 | -0.516615 |
| 27     | 1      | 0    | -1.451720 | -2.675721 | -0.213855 |
| 28     | 1      | 0    | -5.277116 | 0.013946  | -0.097259 |
| 29     | 8      | 0    | -4.575270 | -0.433879 | -0.592284 |
| 30     | 1      | 0    | -3.963487 | -0.815378 | 0.068041  |

### H<sub>6</sub>Si<sub>2</sub>O<sub>7</sub> (Heptahydrate)

Parameters from the DFT/B3LYP/6-31+G(d) level of theory

Mass/ a.m.u.    Energy a.u.    ZPE a.u.  
 300.03916       -1644.65860266    0.271498

Rotational constant/ cm<sup>-1</sup>

0.0132174772722    0.00766296795899    0.00706755604906

Rotational symmetry number

1.0

Vibrational Frequencies/ cm<sup>-1</sup>

|   |              |              |              |              |
|---|--------------|--------------|--------------|--------------|
| [ | 28.82312758  | 30.92213518  | 31.81873115  | 38.85944208  |
|   | 42.6890884   | 53.03816893  | 57.35434019  | 74.68852881  |
|   | 77.43391955  | 85.8716521   | 105.19364261 | 118.1421564  |
|   | 142.60741058 | 145.71421985 | 151.30230631 | 154.00599491 |
|   | 163.6461391  | 174.63465242 | 188.02798901 | 195.9027427  |
|   | 203.55508498 | 207.77395126 | 213.00756955 | 230.35565888 |
|   | 238.09140544 | 248.51693989 | 249.58729476 | 258.44899905 |
|   | 270.82063326 | 272.30105916 | 287.18872235 | 305.82262759 |
|   | 310.25000456 | 324.53993711 | 333.35993926 | 343.85497727 |
|   | 356.01115044 | 369.43228846 | 384.40335593 | 389.9427899  |
|   | 401.57768635 | 419.12038565 | 427.66237355 | 438.89414933 |
|   | 459.09188474 | 479.48423013 | 502.55941305 | 521.04041045 |
|   | 582.43290766 | 600.66369223 | 613.41759605 | 641.9418583  |
|   | 661.59746592 | 686.41718827 | 699.89392914 | 734.97237739 |
|   | 756.19181518 | 765.72770402 | 780.25394869 | 835.25906846 |

```
840.65254495 864.77723167 885.21822955 909.10660415
938.41625667 967.57300136 976.92818094 993.22676646
1045.84096366 1073.32267247 1100.97118984 1107.84509222
1122.03771979 1151.49332979 1180.28170559 1667.83529938
1679.824664 1682.58395545 1702.49672625 1704.13701034
1728.86637806 1787.32582491 3182.40829197 3336.46988974
3443.12310717 3465.64921194 3485.18666351 3515.6778766
3558.41561749 3563.85079612 3582.70711276 3592.81293082
3617.57009997 3627.32840021 3644.95450379 3656.214081
3811.54064361 3815.15482889 3817.64305644 3818.06007782
3828.33965479 3833.71923057]
```

Ground State Electronic Degeneracy and Irreducible Representation

1 ) (A)

Input orientation:

```
-----
Center      Atomic      Atomic      Coordinates (Angstroms)
Number      Number      Type          X           Y           Z
-----
  1          14          0           0.710076    -1.541301    0.164474
  2          14          0          -1.434352    0.649410   -0.514511
  3           8          0           1.541065    2.834733   -0.767706
  4           1          0           2.261912    2.151958   -0.707543
  5           8          0          -0.802937    1.986608    0.227451
  6           1          0           0.052891    2.344804   -0.147506
  7           8          0          -2.660955    0.134246    0.530332
  8           1          0          -2.423368    0.267998    1.471581
  9           8          0          -2.105017    0.876432   -1.982535
 10          1          0          -3.040593    1.172832   -1.966360
 11          8          0           0.039011   -3.027178    0.202087
 12          1          0          -0.943889   -3.054804    0.274456
 13          8          0          -0.289825   -0.506197   -0.642609
 14          8          0           1.081374   -0.912804    1.662004
 15          1          0           0.376582   -0.426903    2.141148
 16          8          0           2.200874   -1.571611   -0.535707
 17          1          0           2.337900   -1.686468   -1.497584
 18          1          0           1.535152    3.143793   -1.685823
 19          1          0           3.822876    0.977507    0.376870
 20          8          0           3.467417    0.891496   -0.535201
 21          1          0           2.978317    0.037602   -0.470617
 22          1          0          -0.727913    1.551115    2.016968
 23          8          0          -0.920312    0.834038    2.669778
 24          1          0          -0.862826    1.214340    3.559444
 25          1          0          -3.273596   -3.106487   -0.295061
 26          8          0          -2.738810   -2.739347    0.424904
 27          1          0          -2.875255   -1.768455    0.399308
 28          1          0          -5.184167    2.084567   -0.863770
 29          8          0          -4.723434    1.263305   -1.090705
 30          1          0          -4.353616    0.908122   -0.258501
 31          8          0           3.410858   -0.814844   -2.900303
 32          1          0           4.126121   -1.236091   -3.399063
 33          1          0           3.825350   -0.111252   -2.363776
 34          8          0           3.543941    0.381068    2.212811
 35          1          0           4.174567   -0.206001    2.655136
 36          1          0           2.719938   -0.145317    2.099610
-----
```
